# Supplementary material for: Identification of Genes Affecting Vacuole Membrane Fragmentation in Saccharomyces cerevisiae
Source: PLoS One. 2013 Feb 1;8(2):e54160. doi: 10.1371/journal.pone.0054160 (PMC3562189; doi:10.1371/journal.pone.0054160)
Supplement: Table S1 — List of primary screening results. Screens were performed in three media, HC, YPD and diluted YPD. Diluted YPD gives the strongest fragmentation response and the easiest readout. Therefore, this screen was performed twice. Clones or plates showing irregularities, such as contaminations or atypical vacuole structure or cell morphology, were re-analyzed separately. (XLSX) [file pone.0054160.s001.xlsx]

## Sheet: Sheet1
Table S1
ORF	gene name(s)	function		round 1	round 2	round 2bis	round 2ter	round 3	SUM	times phenotype	times seen	sum/times seen	x ph. /x seen
YHR091C	MSR1	Mitochondrial arginyl-tRNA synthetase: overlaps with HXT4 promotor (Glc transporter)			3	4			7	2	2	3.5	1
YOL030W	GAS5	,3-beta-glucanosyltransferase		2	4	4	3	3	16	5	5	3.2	1
YBR081C	SPT7, GIT2	Subunit of the SAGA transcriptional Subunit of the SAGA transcriptional regulatory complexregulatory complex					3		3	1	1	3	1
YGR206W	MVB12	ESCRT-I subunit necessary for the efficient transport of cargo proteins to the vacuolar lumen		4	2	2		4	12	4	4	3	1
YKL061W	BLI1	likely member of BLOC complex involved in endosomal cargo sorting						3	3	1	1	3	1
YKL135C	APL2	clathrin-associated protein (AP-1) complex;						3	3	1	1	3	1
YLR357W	RSC2 and YLR358C	telomere maintenance; overlaps with protein of unknown function; expressed at both mRNA and protein levels		2	3	3		4	12	4	4	3	1
YNL324W	FIG4 5' region	dubious ORF; overlaps with Fig4 5' region		1	3	4	3	3	14	5	5	2.8	1
YNL325C	FIG4	forms a complex with Vac14p and is involved in turnover of PI3,5P2		1	4	4	3	2	14	5	5	2.8	1
YDL133C-A	RPL41B, RPL47B	ribosomal protein		3	3	2		3	11	4	4	2.75	1
YML097C	VPS9, VPL31	vesicle-mediated vacuolar protein transport		2	2	3		4	11	4	4	2.75	1
YNL229C	URE2	Nitrogen catabolite repression regulator		2	2	3		4	11	4	4	2.75	1
YLR417W	VPS36	Component of the ESCRT-II complex, is involved in interactions with ESCRT-I and ubiquitin-dependent sorting of proteins into the endosome			2	3		3	8	3	3	2.66667	1
YBR173C	UMP1	maturation of the 20S proteasome		2	3	3		2	10	4	4	2.5	1
YFR021W	NMR1, ATG18	autophagy		2	3	2		3	10	4	4	2.5	1
YNL135C	FPR1	Peptidyl-prolyl cis-trans isomerase (PPIase), binds to the drugs FK506 and rapamycin			2	0	4	4	10	3	4	2.5	0.75
YOR096W	RPS7A	ribosomal protein			4	2	2	2	10	4	4	2.5	1
YPR116W	RRG8	uncharacterized, unknown function		3	2	3		2	10	4	4	2.5	1
YPR119W	CLB2	B-type cyclin involved in cell cycle progression		2	2	2		4	10	4	4	2.5	1
YDR509W	overlaps GNP1	dubious, overlaps YDR508c, a high-affinity glutamine permease, also transports Leu, Ser, Thr, Cys, Met and Asn		3	3	2		1	9	4	4	2.25	1
YFR019W	FAB1, SVL7	vacuolar membrane kinase, vacuolar sorting and homeostasis		2	2	2		3	9	4	4	2.25	1
YHR150W	PEX28	regulation of peroxisome size and number		3	2	1		3	9	4	4	2.25	1
YJR061W		uncharacterized, unknown function		2	2	2		3	9	4	4	2.25	1
YLR360W	VPS38, VPL17	Part of a Vps34p phosphatidylinositol 3-kinase complex		3	2	0		4	9	3	4	2.25	0.75
YOR351C	MEK1	Meiosis-specific serine/threonine protein kinase		1	2	4		2	9	4	4	2.25	1
YAL002W	VPS8, FUN15	Membrane-associated hydrophilic -CORVET protein that interacts with the small GTPase, Vps21p, to facilitate soluble vacuolar protein localization		0	2	2		4	8	3	4	2	0.75
YBR077C	EGO3	EGO-Komplex; TORC1 activator					3	1	4	2	2	2	1
YBR127C	VMA2	Subunit B of V1 peripheral membrane domain of V-ATPase			0	2	4		6	2	3	2	0.666667
YCR020W-B	HTL1	Subunit of the chromatin remodeling complex		2	3	2		1	8	4	4	2	1
YDL151C	FYV3; overlaps RPC53	dubious; RPC53 is RNA-Pol III subunit		2	2	2		2	8	4	4	2	1
YDR140W	FYV9, MTQ2	Methyltransferase		2	2	0		4	8	3	4	2	0.75
YDR207C	UME6	transcriptional regulator of early meiotic genes		4	0	2			6	2	3	2	0.666667
YDR215C		dubious		1	2	2		3	8	4	4	2	1
YDR488C	PAC11	Dynein intermediate chain		2	3	2		1	8	4	4	2	1
YEL072W	RMD6	Protein required for sporulation						2	2	1	1	2	1
YGR165W	MRPS35	Mitochondrial ribosomal protein		2	2	2			6	3	3	2	1
YHR012W	VPS29, PEP11	endosome-to-Golgi retrograde transport		2	0	3		3	8	3	4	2	0.75
YIL023C	YKE4	Zinc transporter		2	2	2		2	8	4	4	2	1
YIL040W	APQ12; GVP36 upstream region	Protein involved in nucleocytoplasmic transport of mRNA; GVP36=BAR domain-containing protein of Golgi vesicles; required for adaptation to varying nutrient concentrations and vacuole biogenesis		1	2	3		2	8	4	4	2	1
YJL024C	APS3, YKS7	subunit of the clathrin-associated adaptator complex AP-3		2	3	3		0	8	3	4	2	0.75
YJR044C	VPS55	Late endosomal and vacuolar protein involved in late endosome to vacuole trafficking		0	2	2		4	8	3	4	2	0.75
YJR051W	OSM1	Mitochondrial fumarate reductase; reduction of fumarate to succinate; required for the reoxidation of intracellular NADH; see also Rib4; Osmosensitive		2	2	1		3	8	4	4	2	1
YJR052W	RAD7	DNA repair		2	2	2		2	8	4	4	2	1
YJR063W	RPA12, RRN4	ribosomal protein					0	4	4	1	2	2	0.5
YKL155C	RSM22	Mitochondrial ribosomal protein; RPS27A is 40S ribosomal protein		4	2	2		0	8	3	4	2	0.75
YKR082W	NUP133	Sbunit of Nup84p subcomplex of the nuclear pore complex		3	3	2		0	8	3	4	2	0.75
YLR025W	SNF7	subunits of the endosomal sorting complex required for transport III (ESCRT-III);		0	2	2		4	8	3	4	2	0.75
YLR169W	overlaps APS1	dubious; APS1 is an AP-1 subunit		1	2	2		3	8	4	4	2	1
YLR226W	BUR2, CST4	Cyclin for the Sgv1p (Bur1p) protein kinase				0	4		4	1	2	2	0.5
YLR287C-A	RPS30A; MEC3 promoter	40S ribosomal protein; MEC3 is DNA damage and meiotic pachytene checkpoint protein						2	2	1	1	2	1
YLR386W	VAC14	Protein involved in regulated synthesis of PtdIns(3,5)P(2), in control of trafficking of some prot to the vacuole via the MVB, and in maintenance of vacuole size and acidity		4	2	2		0	8	3	4	2	0.75
YNL005C	MRP7; LST8 upstream region	Mitochondrial Ribosomal Protein; LST8 is TORC1 subunit		2	0	4			6	2	3	2	0.666667
YNL252C	MRPL17, YML30	Mitochondrial ribosomal protein; TEX1 is Protein involved in mRNA export, component of the transcription export		1	3	2			6	3	3	2	1
YOL086C	ADH1, ADC1	Alcohol dehydrogenase, MHF1 is a replication fork factor		1	2	3			6	3	3	2	1
YOL143C	RIB4,	Lumazine synthase; catalyzes synthesis of immediate precursor to riboflavin; Vit B2 influences NADH;				2			2	1	1	2	1
YOR302W	CPA1 uORF	regulates translation of the CPA1 mRNA; CPA1 is small subunit of carbamoyl phosphate synthetase, which catalyzes a step in the synthesis of citrulline, an arginine precursor		2	3	1		2	8	4	4	2	1
YOR303W	CPA1	synthesis of citrulline		2	3	0		3	8	3	4	2	0.75
YPL203W	TPK2, PKA2	sbunit of cytoplasmic cAMP-dep. Kinase		2	1	2	2	3	10	5	5	2	1
YPR072W	NOT5	transcription initiation, elongat., mRNA degrad.; LTP1 is Protein phosphotyrosine phosphatase of unknown cellular role; activated by adenine		2					2	1	1	2	1
YDL160C	DHH1	stimulates mRNA decapping		2	0	0	3	4	9	3	5	1.8	0.6
YER074W	RPS24A, RPS24EA	ribosomal protein		1	2	2	3	1	9	5	5	1.8	1
YML002W		uncharacterized, unknown function	4	4	1	2	2	0	9	4	5	1.8	0.8
YMR003W		uncharacterized, unknown function	4	4	0	3	2	0	9	3	5	1.8	0.6
YMR006C	PLB2	Phospholipase B	4	4	0	2	2	1	9	4	5	1.8	0.8
YMR009W	ADI1	methionine salvage	4	4	0	2	2	1	9	4	5	1.8	0.8
YPL084W	BRO1	Cytoplasmic class E vacuolar protein sorting (VPS) factor that coordinates deubiquitination in the multivesicular body (MVB) pathway by recruiting Doa4p to endosomes		0	0	2	3	4	9	3	5	1.8	0.6
YCL050C	APA1	catabolism of bis(5'-nucleosidyl) tetraphosphates; these compounds are synthesized by aminoacyl-tRNA synthases (Maria's leucinol effects!)		2	0	2		3	7	3	4	1.75	0.75
YCR102W-A		dubious; sensitive to hypertonic stress		2	3	2		0	7	3	4	1.75	0.75
YDR128W	SEA3	Subunit of the SEA (Seh1-associated) complex, a coatomer-related complex that associates dynamically with the vacuole; ARO1 is in aromatic amino acid synthesis		2	3	0		2	7	3	4	1.75	0.75
YDR214W	AHA1	Co-chaperone that binds to Hsp82p and activates its ATPase activity		1	2	2		2	7	4	4	1.75	1
YDR486C	VPS60	vacuole-localized; late endosome to vacuole transport, interacts with Vta1 (see 106)		3	2	1		1	7	4	4	1.75	1
YGL115W	SNF4	Transcription activating gamma subunit of AMP-activated Snf1p kinase complex (Snf1p and a Sip1p/Sip2p/Gal83p family member); mediates glucose regulation and lipid synthesis.SNF1 is recruited to vacuoles upon Glu-Gly shift		2	2	2		1	7	4	4	1.75	1
YGR160W	overlaps NSR1	dubious; NSR1 is Nucleolar protein that binds nuclear localization sequences, required for pre-rRNA processing and ribosome biogenesis		2		2	3	0	7	3	4	1.75	0.75
YHL035C	VMR1	Vacuolar membrane ABC-protein involved in multiple drug resistancem metal sensitivity, drug transport; potential Cdc28p substrate; induced under respiratory conditions		1	2	2		2	7	4	4	1.75	1
YHR061C	GIC1	involved in initiation of budding and cellular polarization, interacts with Cdc42p via the Cdc42/Rac-interactive binding (CRIB) domain		0	2	3		2	7	3	4	1.75	0.75
YHR135C	YCK1; upstream region of SPL2	plasma membrane-bound casein kinase I isoform; morphogenesis, proper septin assembly, endocytosis; SPL2 is similar to CKIs; interacts with SPX domains		2	2	3		0	7	3	4	1.75	0.75
YHR151C		uncharacterized, unknown function		4	0	2		1	7	3	4	1.75	0.75
YHR163W	SOL3	pentose phosphate pathway		2	2	3		0	7	3	4	1.75	0.75
YIL013C	PDR11	multiple drug resistance; sterol uptake		2	2	2		1	7	4	4	1.75	1
YIR038C	GTT1	ER associated glutathione S-transferase		2	2	2		1	7	4	4	1.75	1
YJR062C	NTA1, DEA1	Amidase, removes amide group from N-terminal asparagine and glutamine residues to generate proteins that are targets of ubiquitin-mediated degradation		1	2	2		2	7	4	4	1.75	1
YJR145C	RPS4A	ribosomal protein		2	1	2		2	7	4	4	1.75	1
YLR181C	VTA1, SAM1 upstream region	Multivesicular body (MVB) protein involved in endosomal protein sorting; SAM1 is S-adenosylmethionine synthase		2	1	0		4	7	3	4	1.75	0.75
YLR348C	DIC1	Mitochondrial dicarboxylate carrier		1	2	3		1	7	4	4	1.75	1
YLR396C	VPS33	subunit of the HOPS complex; AGP2 is ATPase of the CDC48/PAS1/SEC18 (AAA) family; pre-60S maturation		3	2	2		0	7	3	4	1.75	0.75
YLR415C		uncharacterized, unknown function		1	2	3		1	7	4	4	1.75	1
YLR422W		Protein of unknown function with similarity to human DOCK proteins (guanine nucleotide exchange factors); interacts with Ino4.		2	2	2		1	7	4	4	1.75	1
YLR441C	RPS1A	ribosomal protein		2	2	2		1	7	4	4	1.75	1
YML063W	RPS1B, RP10B	ribosomal protein		0	2	4		1	7	3	4	1.75	0.75
YML104C	MDM1	Intermediate filament protein, required for nuclear and mitochondrial transmission to daughter buds, contains a Phox homology (PX) domain		0	2	2		3	7	3	4	1.75	0.75
YNL228W	overlaps YNL227c (JJJ1)	dubious;JJJ1 is Co-chaperone of Ssa1p, required for a late step of ribosome biogenesis; associated with the cytosolic large ribosomal subunit; mutation causes defects in fluid-phase endocytosis			1	2	2	2	7	4	4	1.75	1
YOL044W	PEX15	peroxisome biogenesis		2	0	3		2	7	3	4	1.75	0.75
YOL104C	NDJ1, TAM1	Meiosis-specific telomere protein		1	2	2		2	7	4	4	1.75	1
YOR081C	TGL5	Triacylglycerol lipase		2	2	2		1	7	4	4	1.75	1
YOR226C	ISU2	synthesis of mitochondrial and cytosolic iron-sulfur proteins; mito matrix protein.		2	1	2		2	7	4	4	1.75	1
YPL002C	SNF8, VPS22	Component of the ESCRT-II complex, which is involved in ubiquitin-dependent sorting of proteins into the endosome			2	3	0	2	7	3	4	1.75	0.75
YPL003W	ULA1; SNF8 upstream region	acts in NEDDylation; SNF8 is ESCRT II component		4	0		3	0	7	2	4	1.75	0.5
YPL008W	CHL1	to establish sister-chromatid pairing in S-phase;		4	0		3	0	7	2	4	1.75	0.5
YPR029C	APL4	AP-1 subunit; Deletion mutants of AP-1 complex components are compromised in their ability to synthesize PtdIns(3,5)P2		2	2	2		1	7	4	4	1.75	1
YPR057W	BRR1	pre-mRNA splicing and snRNP biogenesis		2	2	2		1	7	4	4	1.75	1
YBL032W	HEK2	RNA binding protein		2			3	0	5	2	3	1.66667	0.666667
YDL056W	MBP1	Transcription factor involved in regulation of cell cycle		0	3	2			5	2	3	1.66667	0.666667
YDR495C	VPS3, PEP6			1	0			4	5	2	3	1.66667	0.666667
YFL036W	RPO41	Mitochondrial RNA polymerase		0	2	3			5	2	3	1.66667	0.666667
YGL064C	MRH4	Mitochondrial ATP-dependent RNA helicase		1	0			4	5	2	3	1.66667	0.666667
YGR184C	UBR1, PTR1	Ubiquitin-protein ligase (E3)		1	2	2			5	3	3	1.66667	1
YHR108W	GGA2			1	1			3	5	3	3	1.66667	1
YHR161C	YAP1801	Protein involved in clathrin cage assembly			2	3		0	5	2	3	1.66667	0.666667
YJL127C	SPT10, SUD1	histone acetylase	2	2	1	2			5	3	3	1.66667	1
YJR025C	BNA1, HAD1	3-hydroxyanthranilic acid dioxygenase		1	0			4	5	2	3	1.66667	0.666667
YLR170C	APS1, YAP19	Small subunit of the clathrin-associated adaptor complex AP-1		1	1			3	5	3	3	1.66667	1
YLR235C		dubious		1	2	2			5	3	3	1.66667	1
YLR266C	PDR8	Transcription factor		1	2	2			5	3	3	1.66667	1
YLR418C	CDC73	Constituent of Paf1 complex with RNA polymerase II			2	3		0	5	2	3	1.66667	0.666667
YML016C	PPZ1	regulation of potassium transport			2	2		1	5	3	3	1.66667	1
YMR158W	MRPS8	Mitochondrial ribosomal protein		1	2	2			5	3	3	1.66667	1
YOR024W	IRC12	dubious		2		2		1	5	3	3	1.66667	1
YOR036W	VPS6			1	0			4	5	2	3	1.66667	0.666667
YOR080W	DIA2	DNA replication		1	2	2			5	3	3	1.66667	1
YPL005W	AEP3	Peripheral mitochondrial inner membrane protein; NCR1 is Vacuolar membrane protein that transits through the biosynthetic vacuolar protein sorting pathway, involved in sphingolipid metabolism		4	0	1			5	2	3	1.66667	0.666667
YPR099C		dubious		1	2	2			5	3	3	1.66667	1
YHR051W	COX6	Subunit VI of cytochrome c oxidase		0	2	3	2	1	8	4	5	1.6	0.8
YML001W	YPT7, VAM4	Rab GTPase, vacuole fusion	4	4	0	2	2	0	8	3	5	1.6	0.6
YMR002W	MIC17	mitochondrial intermembrane space motif prot	4	4	0	2	2	0	8	3	5	1.6	0.6
YMR008C	PLB1	Phospholipase B	4	4	0	2	2	0	8	3	5	1.6	0.6
YMR070W	MOT3	Nuclear transcription factor		1	2	2	0	3	8	4	5	1.6	0.8
YPL065W	VPS28	Component of the ESCRT-I complex, which is involved in ubiquitin-dependent sorting of proteins into the endosome; involved in transport of precursors for soluble vacuolar hydrolases from the late endosome to the vacuole		0	0	2	2	4	8	3	5	1.6	0.6
YBR082C	UBC4	Ubiquitin-conjugating enzyme		2	1	1		2	6	4	4	1.5	1
YBR106W	PHO88	phosphate transport					0	3	3	1	2	1.5	0.5
YCL032W	STE50	Protein involved in mating response		2	3	1		0	6	3	4	1.5	0.75
YCL034W	LSB5	unknown function; binds Las17p, which is a homolog or human Wiskott-Aldrich Syndrome protein involved in actin patch assembly and actin polymerization		1	3	2		0	6	3	4	1.5	0.75
YCL037C	SRO9	Cytoplasmic RNA-binding protein		1	3	2		0	6	3	4	1.5	0.75
YCL039W	GID7	unknown function		2	2	2		0	6	3	4	1.5	0.75
YCL044C	MGR1	subunit mitochondrial inner membrane protease complex		1	3	2		0	6	3	4	1.5	0.75
YCL047C		uncharacterized, unknown function		2	3	1		0	6	3	4	1.5	0.75
YCR027C	RHB1	Putative Rheb-related GTPase involved in regulating canavanine resistance and arginine uptake; member of the Ras superfamily of G-proteins		0	2	2		2	6	3	4	1.5	0.75
YCR095C	OCA4	uncharacterized, unknown function		1	2	2		1	6	4	4	1.5	1
YDL050C		dubious		1	2	3		0	6	3	4	1.5	0.75
YDL090C	RAM1, FUS8	membrane localization of Ras proteins					0	3	3	1	2	1.5	0.5
YDR058C	TGL2	TriacylGlycerol Lipase		2	2	2		0	6	3	4	1.5	0.75
YDR092W	UBC13	Ubiquitin-conjugating enzyme		2	2	0		2	6	3	4	1.5	0.75
YDR225W	HTA1	histone H2A subtypes		2	2	0		2	6	3	4	1.5	0.75
YDR319C		uncharacterized, unknown function		2	2	2		0	6	3	4	1.5	0.75
YDR333C		uncharacterized, unknown function		2	2	2		0	6	3	4	1.5	0.75
YDR335W	MSN5, STE21	Karyopherin involved in nuclear import and export		2	2	2		0	6	3	4	1.5	0.75
YDR442W		dubious		2	2	2		0	6	3	4	1.5	0.75
YDR446W	ECM11	involved in meiosis		2	2	2		0	6	3	4	1.5	0.75
YDR448W	ADA2, SWI8	Transcription coactivator		2	2	2		0	6	3	4	1.5	0.75
YDR455C		dubious		2	2	2		0	6	3	4	1.5	0.75
YDR505C	PSP1, GIN5	unknown function		2	0	2		2	6	3	4	1.5	0.75
YDR508C	GNP1	High-affinity glutamine permease		1	3	1		1	6	4	4	1.5	1
YDR533C	HSP31	Possible chaperone and cysteine protease		2	2	2		0	6	3	4	1.5	0.75
YEL050C	RML2	Mitochondrial ribosomal protein		0	3	3		0	6	2	4	1.5	0.5
YER056C-A	RPL34A	ribosomal protein		1	2	3		0	6	3	4	1.5	0.75
YGL009C	LEU1	leucine biosynthesis		0	3	3		0	6	2	4	1.5	0.5
YGL072C		dubious		0	2	3		1	6	3	4	1.5	0.75
YGL125W	MET13	Isozyme of methylenetetrahydrofolate reductase		2	2	2		0	6	3	4	1.5	0.75
YGL129C	RSM23	Mitochondrial ribosomal protein		2	2	2		0	6	3	4	1.5	0.75
YGL209W	MIG2, MLZ1	involved in repression		4	2	0		0	6	2	4	1.5	0.5
YGR018C		dubious		2	1	3		0	6	3	4	1.5	0.75
YGR078C	PAC10, RKS2	promotes efficient protein folding		2	2	2		0	6	3	4	1.5	0.75
YGR205W		unknown function		2	2	2		0	6	3	4	1.5	0.75
YGR228W		dubious		1	2				3	2	2	1.5	1
YGR239C	PEX21	Peroxisome related protein		3	0	3		0	6	2	4	1.5	0.5
YHL002W	HSE1	Sbunit of the endosomal Vps27p-Hse1p complex required for sorting of ubiquitinated membrane proteins into intralumenal vesicles prior to vacuolar degradation		0	2	2		2	6	3	4	1.5	0.75
YHL012W		uncharacterized, unknown function		2	0	2		2	6	3	4	1.5	0.75
YHL040C	ARN1	transporter, uptake of iron		2	0	2		2	6	3	4	1.5	0.75
YHL043W	ECM34	unknown function		2	0		2	2	6	3	4	1.5	0.75
YHR015W	MIP6	Putative RNA-binding protein		1	2	2		1	6	4	4	1.5	1
YHR028C	DAP2, DPP2	Dipeptidyl aminopeptidase; localizes to the vacuole		1	2	2		1	6	4	4	1.5	1
YHR111W	UBA4	UBiquitin-like protein Activating		0	2	2		2	6	3	4	1.5	0.75
YHR116W	COX23	mitochondrial copper homeostasis		2	2	2		0	6	3	4	1.5	0.75
YHR152W	SPO12	unknown function		3	2	1		0	6	3	4	1.5	0.75
YHR167W	THP2	transcription elongation and mitotic recombination		2	2	2		0	6	3	4	1.5	0.75
YHR210C		uncharacterized, unknown function		1	2	3		0	6	3	4	1.5	0.75
YJL007C		dubious		2	0	4		0	6	2	4	1.5	0.5
YJL138C	TIF2	translation initiation factor		0	2	3		1	6	3	4	1.5	0.75
YJL164C	TPK1, PKA1	cAMP-dependent protein kinase		0	2	2		2	6	3	4	1.5	0.75
YJL208C	NUC1	mitochondrial nuclease		0	2	3		1	6	3	4	1.5	0.75
YJL215C		dubious		0	3	2		1	6	3	4	1.5	0.75
YJR018W		dubious		2	2	1		1	6	4	4	1.5	1
YJR019C	TES1, PTE1	involved in fatty acid oxidation		2	2	2		0	6	3	4	1.5	0.75
YJR040W	GEF1	chloride channel localized to late- or post-Golgi vesicles, involved in iron metabolism		2	2	2		0	6	3	4	1.5	0.75
YJR050W	ISY1, UTR3	Component of the spliceosome complex		1	2	1		2	6	4	4	1.5	1
YJR066W	TOR1, DRR1	subunit of TORC1, a complex that controls growth in response to nutrients		0	2	2		2	6	3	4	1.5	0.75
YJR126C	VPS70	unknown function involved in vacuolar protein sorting		1	2	3		0	6	3	4	1.5	0.75
YKL136W		dubious		0	2	2		2	6	3	4	1.5	0.75
YKL143W	LTV1, YKL2	sorting of amino acid permease Gap1p; ribosomal small subunit export from nucleus; required for growth at low T		2	0	3		1	6	3	4	1.5	0.75
YKR091W							3	0	3	1	2	1.5	0.5
YLL042C	ATG10	autophagy		3	0	2		1	6	3	4	1.5	0.75
YLR017W	MEU1	methionine salvage, polyamine biosynthesis		3		2	1	0	6	3	4	1.5	0.75
YLR048W				1				2	3	2	2	1.5	1
YLR239C	LIP2	Lipoyl ligase, involved in the modification of mitoch. enzymes by attachment of lipoic acid		3			0		3	1	2	1.5	0.5
YLR315W	NKP2	Non-essential kinetochore protein		1	2	2		1	6	4	4	1.5	1
YLR420W	URA4	biosynthesis of pyrimidines		2		2	2	0	6	3	4	1.5	0.75
YLR425W	TUS1	GEF) that functions to modulate Rho1p activity as part of the cell integrity signaling pathway		3	2	0		1	6	3	4	1.5	0.75
YML013W	SEL1	involved in ER-associated protein degradation			1	2	2	1	6	4	4	1.5	1
YML055W	SPC2, SPY1	Signal Peptidase Complex		3				0	3	1	2	1.5	0.5
YML057W	CMP2, CNA2	Calcineurin A; one isoform (the other is CNA1) of the catalytic subunit of calcineurin, a Ca++/calmodulin-regulated protein phosphatase		1	2	2		1	6	4	4	1.5	1
YMR078C	CTF18, CHL12			1				2	3	2	2	1.5	1
YMR125W	STO1, CBC1	sb of nuclear mRNA cap-binding prot complex		4	2	0		0	6	2	4	1.5	0.5
YMR129W	POM152	Nuclear pore membrane glycoprotein		4	2	0		0	6	2	4	1.5	0.5
YMR302C	PRP12, RNA12	similarity to exonucleases		0	2	2		2	6	3	4	1.5	0.75
YNL008C	ASI3	Amino acid Sensor-Independent		2	2	2		0	6	3	4	1.5	0.75
YNL197C	WHI3	cytoplasmic retention factor for Cdc28p and associated cyclins		0	2	2		2	6	3	4	1.5	0.75
YNL255C	GIS2	proposed to be involved in RAS/cAMP signaling		0	2	2	2		6	3	4	1.5	0.75
YNL320W		uncharacterized, unknown function		0	2	2		2	6	3	4	1.5	0.75
YNR010W	CSE2, MED9	regulation of RNA polymerase II activity		2	1	3		0	6	3	4	1.5	0.75
YOL011W	PLB3	Phospholipase B		0	4	2		0	6	2	4	1.5	0.5
YOL103W	ITR2, HRB612	Myo-inositol transporter		1	2	2		1	6	4	4	1.5	1
YOR035C	DIM1	myosin function regulator, endocytosis, actin polarization, and asymetric mRNA localzation		3	2	1		0	6	3	4	1.5	0.75
YOR084W		Putative lipase of the peroxisomal matrix		1	2	2		1	6	4	4	1.5	1
YOR087W	YVC1	Vacuolar cation channel, mediates release or Ca(2+) from the vacuole in response to hyperosmotic shock		2	2	1		1	6	4	4	1.5	1
YOR089C	VPS21	GTPase required for transport during endocytosis and for correct sorting of vacuolar hydrolases		2		1	0	3	6	3	4	1.5	0.75
YOR187W	TUF1	Mitochondrial translation elongation factor		0	0	3	3		6	2	4	1.5	0.5
YOR189W	IES4	chromatin remodeling complex under [low-salt]		0	2	2		2	6	3	4	1.5	0.75
YOR302W		translation of the CPA1 mRNA regulator		0		1	2	3	6	3	4	1.5	0.75
YOR309C		dubious		2	2	2		0	6	3	4	1.5	0.75
YPL031C	PHO85	Cyclin-dependent kinase, involved in fission			0		3		3	1	2	1.5	0.5
YPL195W	APL5, YKS4	Delta adaptin-like subunit of the clathrin associated protein complex (AP-3)		0	3	3		0	6	2	4	1.5	0.5
YPL225W		unknown function		0	2	2		2	6	3	4	1.5	0.75
YDR241W	BUD26	dubious		2	0	0	2	3	7	3	5	1.4	0.6
YDR249C		uncharacterized, unknown function		3	0	1	3	0	7	3	5	1.4	0.6
YMR044W	IOC4	transcription, elongation	4	4	0	2	0	1	7	3	5	1.4	0.6
YNL139C	RLR1	Subunit of the THO complex, which is required for efficient transcription elongation		1	2	0	4	0	7	3	5	1.4	0.6
YAL016W	TPD3, FUN32	Regulatory subunit of the protein phosphatase 2A		0	2	2			4	2	3	1.33333	0.666667
YBL039C	URA7	Major CTP synthase isozyme		2	0			2	4	2	3	1.33333	0.666667
YCL056C	PEX34	Peroxisomal protein that interacts with Pex11p, Pex25p, and Pex27p to control constitutive peroxisome division, morphology and abundance		1	0			3	4	2	3	1.33333	0.666667
YCR014C	POL4	DNA polymerase IV			2	2		0	4	2	3	1.33333	0.666667
YDL047W	SIT4, LGN4	serine-threonine phosphatase, mitotic cycle			2	2		0	4	2	3	1.33333	0.666667
YDL053C	PBP4	Pbp1p binding protein		0	2	2			4	2	3	1.33333	0.666667
YDL083C	RPS16B	40S ribosomal protein		2			2	0	4	2	3	1.33333	0.666667
YDR105C				0	1			3	4	2	3	1.33333	0.666667
YDR354W	TRP4			1	0			3	4	2	3	1.33333	0.666667
YDR445C		dubious		3		1		0	4	2	3	1.33333	0.666667
YEL001C	IRC22	uncharacterized, unknown function			2	1		1	4	3	3	1.33333	1
YER031C	YPT31, YPT8	GTPase of the Ypt/Rab family, very similar to Ypt32p; involved in the exocytic pathway; mediates intra-Golgi traffic or the budding of post-Golgi vesicles from the trans			2	2		0	4	2	3	1.33333	0.666667
YER050C	RSM18	Mitochondrial ribosomal protein			2	2		0	4	2	3	1.33333	0.666667
YFL016C	MDJ1	folding of mitochondrially synthesized proteins		0	2	2			4	2	3	1.33333	0.666667
YFL033C	RIM15, TAK1			0	1			3	4	2	3	1.33333	0.666667
YGL079W		uncharacterized, unknown function		1	0			3	4	2	3	1.33333	0.666667
YGL095C	VPS45	Protein of the Sec1p/Munc-18 family, essential for vacuolar protein sorting			2	2	0		4	2	3	1.33333	0.666667
YGL206C	CHC1	Clathrin heavy chain, subunit of the major coat protein involved in intracellular protein transport and endocytosis				2	2	0	4	2	3	1.33333	0.666667
YGR006W	PRP18	Splicing factor		2	2	0			4	2	3	1.33333	0.666667
YGR064W		dubious		2	2	0			4	2	3	1.33333	0.666667
YGR084C	MRP13	Mitochondrial ribosomal protein		1	3			0	4	2	3	1.33333	0.666667
YGR155W	CYS4, VMA41	cysteine biosynthesis		2	0	2			4	2	3	1.33333	0.666667
YGR187C	HGH1	unknown function		2	2	0			4	2	3	1.33333	0.666667
YHR018C	ARG4	Argininosuccinate lyase		0	2	2			4	2	3	1.33333	0.666667
YHR064C	PDR13	Hsp70 protein		0		2	2		4	2	3	1.33333	0.666667
YHR076W	PTC7	Mitochondrially localized type 2C protein phosphatase		0	2	2			4	2	3	1.33333	0.666667
YJL080C	SCP160	effector of mating response		0	2	2			4	2	3	1.33333	0.666667
YJL107C		uncharacterized, unknown function	4	4	0			0	4	1	3	1.33333	0.333333
YJL117W	PHO86	ER exit of the high-affinity phosphate transporter Pho84p, specifically required for packaging of Pho84p into COPII vesicles			2	2		0	4	2	3	1.33333	0.666667
YJR001W	AVT1	Vacuolar transporter, imports large neutral amino acids			2	2		0	4	2	3	1.33333	0.666667
YJR032W	CPR7	Peptidyl-prolyl cis-trans isomerase (cyclophilin)		1	0			3	4	2	3	1.33333	0.666667
YJR074W	MOG1	nuclear protein import		2	0	2			4	2	3	1.33333	0.666667
YJR077C	MIR1	Mitochondrial phosphate carrier		2	2	0			4	2	3	1.33333	0.666667
YKR035W-A	DID2	Class E protein of the vacuolar protein-sorting (Vps) pathway; binds Vps4p and directs it to dissociate ESCRT-III		0	0			4	4	1	3	1.33333	0.333333
YLR001C		unknown function		2	0	2			4	2	3	1.33333	0.666667
YLR052W	IES3	Subunit of the chromatin remodeling complex			2	2	0		4	2	3	1.33333	0.666667
YLR192C	HCR1	translation initiation		1	1	2			4	3	3	1.33333	1
YLR372W	SUR4, ELO3	Elongase, fatty acid and sphingolipid biosynth.			2	2		0	4	2	3	1.33333	0.666667
YLR447C	VMA6			1			3	0	4	2	3	1.33333	0.666667
YMR320W		dubious			4	0	0		4	1	3	1.33333	0.333333
YNL032W	SIW14	Tyrosine phosphatase that plays a role in actin filament organization and endocytosis; localized to the cytoplasm		0	2	2			4	2	3	1.33333	0.666667
YNL226W		dubious			0	2	2		4	2	3	1.33333	0.666667
YNL284C	MRPL10	Mitochondrial ribosomal protein		4	0		0		4	1	3	1.33333	0.333333
YNL334C	SNO2			0	1			3	4	2	3	1.33333	0.666667
YNR052C	POP2, CAF1			1	0			3	4	2	3	1.33333	0.666667
YOR135C	IRC14	dubious			1		2	1	4	3	3	1.33333	1
YOR290C	SNF2	transcriptional regulation		0	2	2			4	2	3	1.33333	0.666667
YPL114W		dubious			2	2		0	4	2	3	1.33333	0.666667
YPL199C		uncharacterized, unknown function		1	0			3	4	2	3	1.33333	0.666667
YPL271W	ATP15	subunit of mitochondrial F1F0 ATP synthase		0	2	2			4	2	3	1.33333	0.666667
YPR133W-A	TOM5, MOM8A			1	0			3	4	2	3	1.33333	0.666667
YPR160W	GPH1	Non-essential glycogen phosphorylase		0	0			4	4	1	3	1.33333	0.333333
YAL027W		uncharacterized, unknown function	1	1	2	2		0	5	3	4	1.25	0.75
YBL024W	NCL1, TRM4	S-adenosyl-L-methionine-dependent tRNA		0	2	0		3	5	2	4	1.25	0.5
YBR032W		dubious		1		0	4	0	5	2	4	1.25	0.5
YBR189W	RPS9B, RPS13A	ribosomal protein		1	2	2		0	5	3	4	1.25	0.75
YBR199W	KTR4	Putative mannosyltransferase involved in prot glycosylation		1	2	2		0	5	3	4	1.25	0.75
YBR266C	SLM6	dubious		2	2	1		0	5	3	4	1.25	0.75
YBR290W	BSD2	Heavy metal ion homeostasis protein		0	2	3		0	5	2	4	1.25	0.5
YCL033C		uncharacterized, unknown function		1	2	2		0	5	3	4	1.25	0.75
YCL036W	GFD2	unknown function		1	2	2		0	5	3	4	1.25	0.75
YCL046W		dubious		3	0	2		0	5	2	4	1.25	0.5
YCL048W	SPS22	unknown function		1	2	2		0	5	3	4	1.25	0.75
YCR001W		dubious		1	2	2		0	5	3	4	1.25	0.75
YCR004C	YCP4	unknown function		1	2	2		0	5	3	4	1.25	0.75
YDL048C	STP4	protein with similarity to Stp1p		0	3	2		0	5	2	4	1.25	0.5
YDL049C	KNH1	cell wall beta 1,6-glucan synthesis		1	2	2		0	5	3	4	1.25	0.75
YDL052C	SLC1	1-acyl-sn-gylcerol-3-phosphate acyltransferase		1	2	2		0	5	3	4	1.25	0.75
YDL054C	MCH1	similarity to mammalian monocarboxylate permeases		0	3	2		0	5	2	4	1.25	0.5
YDL057W		uncharacterized, unknown function		0	3	2		0	5	2	4	1.25	0.5
YDR098C	GRX3	Hydroperoxide and superoxide-radical responsive glutathione-dependent oxidoreductase		1	2	2		0	5	3	4	1.25	0.75
YDR116C	MRPL1	Mitochondrial ribosomal protein		1	3	1		0	5	3	4	1.25	0.75
YDR179W-A		uncharacterized, unknown function		2	0	2		1	5	3	4	1.25	0.75
YDR210W		uncharacterized, unknown function		2	2	1		0	5	3	4	1.25	0.75
YDR213W	UPC2	Sterol regulatory element binding protein		1	2	2		0	5	3	4	1.25	0.75
YDR220C		dubious		1	2	2		0	5	3	4	1.25	0.75
YDR221W	GTB1	Glucosidase II beta subunit		1	2	2		0	5	3	4	1.25	0.75
YDR237W	MRPL7	Mitochondrial ribosomal protein		1	2	2		0	5	3	4	1.25	0.75
YDR245W	MNN10, BED1	Subunit of a Golgi mannosyltransferase complex		2	0	1		2	5	3	4	1.25	0.75
YDR269C		dubious		1	2	2		0	5	3	4	1.25	0.75
YDR300C	PRO1	proline biosynthesis		0	2	0	3		5	2	4	1.25	0.5
YDR318W	MCM21	involved in minichromosome maintenance		2	1	2		0	5	3	4	1.25	0.75
YDR329C	PEX3, PAS3	Peroxisomal prot required to recruit Pex19p		2	0	2		1	5	3	4	1.25	0.75
YDR358W	GGA1	facilitates traffic through the late Golgi		2	0	1		2	5	3	4	1.25	0.75
YDR387C		uncharacterized, unknown function		2	1		2	0	5	3	4	1.25	0.75
YDR447C	RPS17B, RPL51B	ribosomal protein		1	2	2		0	5	3	4	1.25	0.75
YDR450W	RPS18A	ribosomal protein		1	1		3	0	5	3	4	1.25	0.75
YDR456W	NHX1	Endosomal Na+/H+ exchanger		1	2	2		0	5	3	4	1.25	0.75
YDR462W	MRPL28	Mitochondrial ribosomal protein		2	2	1		0	5	3	4	1.25	0.75
YDR492W	IZH1	zinc metabolism		2	2	1		0	5	3	4	1.25	0.75
YDR516C	EMI2	unknown function		2	0	3		0	5	2	4	1.25	0.5
YEL014C		dubious		2	2	0		1	5	3	4	1.25	0.75
YEL017W	GTT3	unknown function		1	2	2		0	5	3	4	1.25	0.75
YER005W	YND1, YEJ5	Apyrase with wide substrate specificity		1	2	2		0	5	3	4	1.25	0.75
YER123W	YCK3, CKI3	Palmitoylated, vacuolar membrane-localized casein kinase I isoform; negatively regulates vacuole fusion during hypertonic stress via phosphorylation of the HOPS complex subunit, Vps41p		1	2	2		0	5	3	4	1.25	0.75
YER155C	BEM2, IPL2	control of cytoskeleton organization and cellular morphogenesis; required for bud emergence		1	2	2		0	5	3	4	1.25	0.75
YFL018C	LPD1, HPD1	Dihydrolipoamide dehydrogenase		1	2	2		0	5	3	4	1.25	0.75
YFL033C	RIM15	signal transduction during cell proliferation		2	0	2		1	5	3	4	1.25	0.75
YGL216W	KIP3	Kinesin-related motor protein involved in mitotic spindle positioning		2	0		3	0	5	2	4	1.25	0.5
YGL219C	MDM34	Mitochondrial Distribution and Morphology		2	0	2		1	5	3	4	1.25	0.75
YGL236C	MTO1, IPS1	Mitochondrial protein		4	0	1		0	5	2	4	1.25	0.5
YGR079W		uncharacterized, unknown function		1	2	2		0	5	3	4	1.25	0.75
YGR101W	PCP1	Mitochondrial serine protease		0	3	2		0	5	2	4	1.25	0.5
YGR122W		uncharacterized, unknown function			2	0	3	0	5	2	4	1.25	0.5
YGR204W	ADE3	biosynthesis of purines, thymidylate, methionine, histidine			2	2	1	0	5	3	4	1.25	0.75
YGR213C	RTA1	involved in 7-aminocholesterol resistance		2	2	1		0	5	3	4	1.25	0.75
YHL006C	SHU1	involved in mutation suppression		0	2	1		2	5	3	4	1.25	0.75
YHL010C		uncharacterized, unknown function			0	2	3	0	5	2	4	1.25	0.5
YHL023C	RMD11	Protein required for sporulation		0	2	2		1	5	3	4	1.25	0.75
YHL029C	OCA5	uncharacterized, unknown function		0	2	2		1	5	3	4	1.25	0.75
YHL034C	SBP1, SSBR1	Nucleolar single-strand nucleic acid binding protein		0	3	2		0	5	2	4	1.25	0.5
YHL041W		dubious		2	0	2		1	5	3	4	1.25	0.75
YHR038W	FIL1, KIM4	mitochondrial protein synthesis, respiratory function of mirochondria		0	2	3		0	5	2	4	1.25	0.5
YHR048W		uncharacterized, unknown function		0	2	3		0	5	2	4	1.25	0.5
YHR066W	SSF1	Constituent of 66S pre-ribosomal particles		0	2	2		1	5	3	4	1.25	0.75
YHR077C	NMD2	involved in the nonsense-mediated mRNA decay pathway		0	2	3		0	5	2	4	1.25	0.5
YHR079C-B	SAE3	Meiosis specific protein		2	2		0	1	5	3	4	1.25	0.75
YHR087W		uncharacterized, unknown function		0	2	2		1	5	3	4	1.25	0.75
YHR100C		uncharacterized, unknown function		1	2	2		0	5	3	4	1.25	0.75
YHR123W	EPT1	ethanolamine- and cholinephosphotranferase		2	0	1		2	5	3	4	1.25	0.75
YHR124W	NDT80	Meiosis-specific transcription factor		2	1	2		0	5	3	4	1.25	0.75
YHR209W	CRG1	uncharacterized, unknown function		1	2	2		0	5	3	4	1.25	0.75
YIL036W	CST6	Basic leucine zipper (bZIP) transcription factor		1	2	2		0	5	3	4	1.25	0.75
YIL045W	PIG2	tethers Glc7p to Gsy2p		2	1	2		0	5	3	4	1.25	0.75
YIL049W	DFG10	filamentous growth		3	0	2		0	5	2	4	1.25	0.5
YIL116W	HIS5	histidine biosynthesis		1	2	2		0	5	3	4	1.25	0.75
YIL123W	SIM1	DNA replication		2	2	0		1	5	3	4	1.25	0.75
YIR017C	MET28	regulation of sulfur metabolism		2	2	1		0	5	3	4	1.25	0.75
YJL046W		uncharacterized, unknown function		0	2		3	0	5	2	4	1.25	0.5
YJL094C	KHA1	Putative K+/H+ antiporter		2	2	1		0	5	3	4	1.25	0.75
YJL154C	VPS35, GRD9	required for retrograde transport		0		2	2	1	5	3	4	1.25	0.75
YJL206C-A	NCE1, RCY1 upstream region	unknown function; RCY1 is F-box protein involved in recycling plasma membrane proteins internalized by endocytosis		0	2	2		1	5	3	4	1.25	0.75
YJR014W	TMA22	unknown function		1	2	2		0	5	3	4	1.25	0.75
YJR035W	RAD26	transcription-coupled repair nucleotide		1	2	2		0	5	3	4	1.25	0.75
YJR043C	POL32	subunit of DNA polymerase delta		0	2	2		1	5	3	4	1.25	0.75
YJR140C	HIR3, HPC1	histone regulation		2	0	3		0	5	2	4	1.25	0.5
YKL009W	MRT4	Protein involved in mRNA turnover and ribosome assembly		0	3	2		0	5	2	4	1.25	0.5
YKL069W		uncharacterized, unknown function		3		0	2	0	5	2	4	1.25	0.5
YKL079W	SMY1	Protein that interacts with Myo2p, exocytosis		2		0	2	1	5	3	4	1.25	0.75
YKL212W	SAC1, RSD1	Lipid phosphoinositide phosphatase of the ER and Golgi, involved in protein trafficking and secretion		0	3	2		0	5	2	4	1.25	0.5
YKR024C	DBP7	Putative ATP-dependent RNA helicase		1	2	2		0	5	3	4	1.25	0.75
YKR027W	BCH2	ChAPs protein		3	0	2		0	5	2	4	1.25	0.5
YKR084C	HBS1	ribosomal protein components		2	2	1		0	5	3	4	1.25	0.75
YKR093W	PTR2	Integral membrane peptide transporter		2	1	1		1	5	4	4	1.25	1
YKR099W	BAS1	purine and histidine biosynthesis		2	2	1		0	5	3	4	1.25	0.75
YLL051C	FRE6	Putative ferric reductase		2	0	1	2		5	3	4	1.25	0.75
YLR013W	GAT3	Prot containing GATA family Zn finger motifs		2	2	1		0	5	3	4	1.25	0.75
YLR094C	GIS3	unknown function		2		0	2	1	5	3	4	1.25	0.75
YLR134W	PDC5	Minor isoform of pyruvate decarboxylase		2		0	3	0	5	2	4	1.25	0.5
YLR142W	PUT1	Proline oxidase		0		2	3	0	5	2	4	1.25	0.5
YLR143W		uncharacterized, unknown function		0		2	3	0	5	2	4	1.25	0.5
YLR171W		dubious		2	0	0		3	5	2	4	1.25	0.5
YLR271W		uncharacterized, unknown function		1	3	1		0	5	3	4	1.25	0.75
YLR273C	PIG1	Putative targeting subunit for Glc7p		2	3	0		0	5	2	4	1.25	0.5
YLR299W	ECM38, CIS2	Gamma-glutamyltranspeptidase		1	2	1		1	5	4	4	1.25	1
YLR306W	UBC12	Enzyme that mediates the conjugation of Rub1p, a ubiquitin-like protein, to other proteins		0	3	2		0	5	2	4	1.25	0.5
YLR320W	MMS22	Protein involved in resistance to ionizing radiation		1	2	1		1	5	4	4	1.25	1
YLR374C		dubious		1	2	2		0	5	3	4	1.25	0.75
YLR387C	REH1	unknown function		0	3	2		0	5	2	4	1.25	0.5
YLR401C	DUS3	Dihydrouridine synthase		1	1	3		0	5	3	4	1.25	0.75
YLR403W	SFP1	Transcription factor that controls expression of many ribosome biogenesis genes in response to nutrients and stress		1	2	2		0	5	3	4	1.25	0.75
YLR455W		uncharacterized, unknown function		0	2	3		0	5	2	4	1.25	0.5
YML021C	UNG1	Uracil-DNA glycosylase		1	2	2		0	5	3	4	1.25	0.75
YML080W	DUS1	Dihydrouridine synthase,		0	2	2		1	5	3	4	1.25	0.75
YMR014W	BUD22	involved in bud-site selection		0		2	3	0	5	2	4	1.25	0.5
YMR040W	YET2; promotor of ARA2	unknown function; may interact with ribosomes; ARA2 is NAD-dependent arabinose dehydrogenase		0	2	2		1	5	3	4	1.25	0.75
YMR127C	SAS2	catalytic subunit of the SAS complex (histone acetyl transferase)		4	1	0		0	5	2	4	1.25	0.5
YMR153W	NUP53	Subunit of the nuclear pore complex		0		2	2	1	5	3	4	1.25	0.75
YMR159C	APG16, SAP18	autophagy		0		2	1	2	5	3	4	1.25	0.75
YMR198W	CIK1	Kinesin-associated prot, spindle organization		0	2		2	1	5	3	4	1.25	0.75
YMR305C	SCW10	Cell wall protein with similarity to glucanases		0	2	2		1	5	3	4	1.25	0.75
YNL054W	VAC7	in vacuole inheritance and morphology		2	3	0		0	5	2	4	1.25	0.5
YNL299W	TRF5	nuclear RNA quality control		1	2	2		0	5	3	4	1.25	0.75
YNR008W	LRO1	Acyltransferase that catalyzes diacylglycerol esterification		1	2	2		0	5	3	4	1.25	0.75
YOL029C		uncharacterized, unknown function		1	2	2		0	5	3	4	1.25	0.75
YOL032W	OPI10	possible role in phospholipid biosynthesis		0	3	2		0	5	2	4	1.25	0.5
YOL041C	NOP12	required for pre-25S rRNA processing		0	3	2		0	5	2	4	1.25	0.5
YOL046C		dubious		2	0	2		1	5	3	4	1.25	0.75
YOL058W	ARG1	Arginosuccinate synthetase, potential Cdc28p substrate		0	3	2		0	5	2	4	1.25	0.5
YOL072W	BUD29	Nuclear pore-associated protein		1	2	0	2		5	3	4	1.25	0.75
YOL153C		pseudogene		0	2	3		0	5	2	4	1.25	0.5
YOR152C		uncharacterized, unknown function		1	2	2		0	5	3	4	1.25	0.75
YOR270C	VPH1	sbunit of the V-ATPase		1	2	2		0	5	3	4	1.25	0.75
YOR276W	CAF20, CAP20	translational control		2	3	0		0	5	2	4	1.25	0.5
YOR344C	TYE7	contributes to the activation of glycolytic genes		0	2	2		1	5	3	4	1.25	0.75
YOR364W		dubious		1	2	2		0	5	3	4	1.25	0.75
YPL079W	RPL21B	ribosomal protein		1	0		2	2	5	3	4	1.25	0.75
YPL090C	RPS6A	ribosomal protein		3		0	2	0	5	2	4	1.25	0.5
YPL104W		Mitochondrial aspartyl-tRNA synthetase		2	2	1		0	5	3	4	1.25	0.75
YPL129W	TAF14	chromatin modification		0	0	2	3		5	2	4	1.25	0.5
YPL137C	GIP3	Glc7-interacting protein whose overexpression relocalizes Glc7p from the nucleus and prevents chromosome segregation		3	0		2	0	5	2	4	1.25	0.5
YPR120C	CLB5	B-type cyclin involved in DNA replication		3	2	0		0	5	2	4	1.25	0.5
YPR141C	KAR3, OSR11	Minus-end-directed microtubule motor that functions in mitosis and meiosis		0	2	2		1	5	3	4	1.25	0.75
YPR166C	MRP2	Mitochondrial ribosomal protein		0	2	3		0	5	2	4	1.25	0.5
YDL183C	MKR1	mitochondrial K+/H+ exchanger		2	0	0	2	2	6	3	5	1.2	0.6
YGR081C	SLX9	for pre-rRNA processing		2	0	0	3	1	6	3	5	1.2	0.6
YGR088W	CTT1	protection from oxidative damage		1	0	1	4	0	6	3	5	1.2	0.6
YGR104C	SRB5	Subunit of the RNA polymerase II		2	0	0	4	0	6	2	5	1.2	0.4
YHL033C	RPL8A, MAK7	ribosomal protein		0	2	2	2	0	6	3	5	1.2	0.6
YIL110W	MNI1	uncharacterized, unknown function		2	2	0	0	2	6	3	5	1.2	0.6
YIL120W	QDR1	Multidrug transporter		2	2	2	0	0	6	3	5	1.2	0.6
YJL036W	SNX4	retrieval of late-Golgi SNAREs from the post Golgi endosome to the trans-Golgi network and cytoplasm to vacuole transport		0	1	2	3	0	6	3	5	1.2	0.6
YLL046C	RNP1	ribonucleoprotein		3	0	1	2	0	6	3	5	1.2	0.6
YMR007W		dubious	4	4	0	2	0	0	6	2	5	1.2	0.4
YMR010W		uncharacterized, unknown function	4	4	0	2	0	0	6	2	5	1.2	0.4
YMR027W	HRT2	ubiquitination, degradation	4	4	0	2	0	0	6	2	5	1.2	0.4
YMR153C-A		dubious	2	2	1	1	2	0	6	4	5	1.2	0.8
YNL059C	ARP5	Nuclear actin-related protein involved in chromatin remodeling		2	0	0	2	2	6	3	5	1.2	0.6
YOR010C	TIR2	Putative cell wall mannoprotein		2	1	2	0	1	6	4	5	1.2	0.8
YOR038C	HIR2	cell cycle-regulated transcription of histone		3	1	0	2	0	6	3	5	1.2	0.6
YOR191W	RIS1	DNA-dependent ATPases		0	1	2	1	2	6	4	5	1.2	0.8
YPL009C		unknown function		4	0	0	2	0	6	2	5	1.2	0.4
YPL179W	PPQ1	Putative protein serine/threonine phosphatase		0	0	2	2	2	6	3	5	1.2	0.6
YAL021C	CCR4, FUN27, NUT21	mRNA poly(A) tail shortening		0	0			3	3	1	3	1	0.333333
YAL023C	PMT2, FUN25	O-mannosyltransferase		0	2	2		0	4	2	4	1	0.5
YAL024C	LTE1, MSI2	Putative GDP/GTP exchange factor required for mitotic exit		0	2	2		0	4	2	4	1	0.5
YAL035W	FUN12	GTPase, require for general translation, binds to ribosomes		1	0			2	3	2	3	1	0.666667
YAL048C	GEM1	Outer mitochondrial membrane GTPase		1	0			2	3	2	3	1	0.666667
YAL067C	SEO1	Putative permease		0	2	2		0	4	2	4	1	0.5
YAR040C		???		0	2	2		0	4	2	4	1	0.5
YAR044W	OSH1	oxysterol-binding protein		0	2	2		0	4	2	4	1	0.5
YBL042C	FUI1	High affinity uridine permease		2	0	0	3	0	5	2	5	1	0.4
YBL072C	RPS8A	ribosomal protein		0	0	3	2	0	5	2	5	1	0.4
YBR019C	GAL10	UDP-glucose-4-epimerase		0	2	2		0	4	2	4	1	0.5
YBR021W	FUR4	Uracil permease		2		2	0	0	4	2	4	1	0.5
YBR035C	PDX3	Pyridoxine (pyridoxamine) phosphate oxidas					0	2	2	1	2	1	0.5
YBR074W		uncharacterized, unknown function		0	2		2	0	4	2	4	1	0.5
YBR078W	ECM33						2	0	2	1	2	1	0.5
YBR085W	AAC3, ANC3						2	0	2	1	2	1	0.5
YBR101C	FES1	nucleotide exchange factor					0	2	2	1	2	1	0.5
YBR111C	YSA1, RMA2	ADP-ribose pyrophosphatase activity;		1	0			2	3	2	3	1	0.666667
YBR130C	SHE3						2	0	2	1	2	1	0.5
YBR134W		dubious		2	0	2		0	4	2	4	1	0.5
YBR224W		dubious		0	2	2		0	4	2	4	1	0.5
YBR248C	HIS7	histidine biosynthesis		1	1	2		0	4	3	4	1	0.75
YBR286W	APE3	Vacuolar aminopeptidase Y		0	2	2		0	4	2	4	1	0.5
YBR295W	PCA1	copper and iron homeostasis		2	0	2		0	4	2	4	1	0.5
YCL008C	STP22	Component of the ESCRT-I complex		1	0			2	3	2	3	1	0.666667
YCL014W	BUD3	budding pattern		2	2	0		0	4	2	4	1	0.5
YCL016C	DCC1	required sister chromatid cohesion and telomere length maintenance		1	1	2		0	4	3	4	1	0.75
YCL024W	KCC4	kinase of the bud neck, septin checkpoint		2	0	2		0	4	2	4	1	0.5
YCL030C	HIS4	histidine biosynthesis		2	2	0		0	4	2	4	1	0.5
YCL049C		uncharacterized, unknown function		1	0			2	3	2	3	1	0.666667
YCL051W	LRE1	involved in control of cell wall structure and stress response		2	0	2		0	4	2	4	1	0.5
YCL057W	PRD1	Zinc metalloendopeptidase		2	0	1		1	4	3	4	1	0.75
YCL064C	CHA1	Catabolic L-serine (L-threonine) deaminase		1	3	0		0	4	2	4	1	0.5
YCL069W	VBA3	Permease of basic amino acids in the vacuolar membrane		1	3	0		0	4	2	4	1	0.5
YCR008W	SAT4	Ser/Thr protein kinase involved in salt tolerance		2	0	2		0	4	2	4	1	0.5
YCR010C	ADY2	Acetate transporter required for normal sporulation		0	2	2		0	4	2	4	1	0.5
YDL001W	RMD1	Cytoplasmic protein required for sporulation		0	2	2		0	4	2	4	1	0.5
YDL005C	MED2	Subunit of the RNA polymerase II mediator complex		0	2	2		0	4	2	4	1	0.5
YDL038C		uncharacterized, unknown function		0	2	2		0	4	2	4	1	0.5
YDL051W	LHP1, YLA1	RNA binding protein		0	2	2		0	4	2	4	1	0.5
YDL119C		uncharacterized, unknown function		0	0	0		4	4	1	4	1	0.25
YDL185W	TFP1, VMA1	Vacuolar ATPase V1 domain subunit A		2	0	0	3	0	5	2	5	1	0.4
YDL188C	PPH22, PPH2	Catalytic subunit of protein phosphatase 2A		2	0	2		0	4	2	4	1	0.5
YDL229W	SSB1, YG101	ribosome-associated molecular chaperone,		2	2	0		0	4	2	4	1	0.5
YDR073W	SNF11	transcriptional regulation		2	0	1			3	2	3	1	0.666667
YDR076W	RAD55	involved in the recombinational repair		2	0	2		0	4	2	4	1	0.5
YDR099W	BMH2, SCD3	controls proteome at post-transcriptional level, binds proteins and DNA, involved in regulation of many processes including exocytosis, vesicle transport, Ras/MAPK signaling, and rapamycin-sensitive signaling		0	2	2		0	4	2	4	1	0.5
YDR102C				0	1			2	3	2	3	1	0.666667
YDR115W				1	0			2	3	2	3	1	0.666667
YDR138W	HPR1	transcription elongation		2		0	2	0	4	2	4	1	0.5
YDR142C	PEX7, PAS7	Peroxisomal signal receptor for the N-terminal nonapeptide signal (PTS2)		0	2	2		0	4	2	4	1	0.5
YDR176W	NGG1	glucose repression		2	0		2	0	4	2	4	1	0.5
YDR183W	PLP1	in folding of beta-tubulin		2	0	2		0	4	2	4	1	0.5
YDR194C	MSS1 16	splicing of mitochondrial Group I and II introns		2	0	0	3	0	5	2	5	1	0.4
YDR195W	REF2	RNA-binding protein		0	2	2		0	4	2	4	1	0.5
YDR205W	MSC2	Member of the cation diffusion facilitator family, localizes to the ER and nucleus		3	0	1		0	4	2	4	1	0.5
YDR209C		dubious		1	2	1		0	4	3	4	1	0.75
YDR219C	MFB1	Mitochondria-associated F-box protein involved in maintenance of normal mitochondrial morphology		0	2	2		0	4	2	4	1	0.5
YDR255C	RMD5	Cytosolic protein required for sporulation		2	0	0	1	2	5	3	5	1	0.6
YDR256C	CTA1	Catalase A, breaks down hydrogen peroxide in the peroxisomal matrix		2	0	2		0	4	2	4	1	0.5
YDR271C		dubious		0	2	2		0	4	2	4	1	0.5
YDR272W	GLO2	Cytoplasmic glyoxalase II		0	2	2		0	4	2	4	1	0.5
YDR313C	PIB1	RING-type ubiquitin ligase of the endosomal and vacuolar membranes, binds phosphatidylinositol (3)-phosphate; contains a FYVE finger domain		2	0	0	3	0	5	2	5	1	0.4
YDR323C	VAC1, VPS19	Multivalent adaptor protein that facilitates vesicle-mediated vacuolar protein sorting by ensuring high-fidelity vesicle docking and fusion, which are essential for targeting or vesicles to the endosome; required for vacuole inheritance			2	2	0	0	4	2	4	1	0.5
YDR330W	UBX5	ubiquitin regulatory domain-containing protein that interacts with Cdc48p		2	0	2		0	4	2	4	1	0.5
YDR334W	SWR1	exchanges histone variant		2	0	2		0	4	2	4	1	0.5
YDR338C		uncharacterized, unknown function		0	0	0	3	2	5	2	5	1	0.4
YDR348C		uncharacterized, unknown function		1	0	1	2		4	3	4	1	0.75
YDR363W-A	SEM1						0	2	2	1	2	1	0.5
YDR374C				1	0			2	3	2	3	1	0.666667
YDR378C	LSM6	Lsm (Like Sm) protein		2	1	0		1	4	3	4	1	0.75
YDR385W	EFT2	Elongation factor 2		1	2	1		0	4	3	4	1	0.75
YDR388W	RVS167	Actin-associated protein, involved in regulation of actin cytoskeleton, endocytosis, and viability following starvation or osmotic stress; homolog of mammalian amphiphysin		3	0	0	2	0	5	2	5	1	0.4
YDR414C	ERD1	Predicted membrane protein required for the retention of lumenal endoplasmic reticulum proteins		0	2	2		0	4	2	4	1	0.5
YDR425W	SNX41	Sorting nexin, involved in the retrieval of late-Golgi SNAREs from the post-Golgi endosome to the trans-Golgi network		0	2	2		0	4	2	4	1	0.5
YDR426C		dubious		0	2	2		0	4	2	4	1	0.5
YDR433W	KRE22	dubious		0	2	0	3	0	5	2	5	1	0.4
YDR440W	DOT1, PCH1	functions in gene silencing at telomeres		2	2	0		0	4	2	4	1	0.5
YDR451C	YHP1	homeobox transcriptional repressors		1	1		2	0	4	3	4	1	0.75
YDR461W	MFA1	Mating pheromone a-factor, made by a cells		0	2	2		0	4	2	4	1	0.5
YDR466W	PHKH3	redundant upstream activators of Pkc1p		2	1	0			3	2	3	1	0.666667
YDR471W	RPL27B	ribosomal protein		2	2	0		0	4	2	4	1	0.5
YDR474C		merged with YDR475C		2	2	0		0	4	2	4	1	0.5
YDR480W	DIG2, RST2	Regulatory protein of unknown function		2	2	0		0	4	2	4	1	0.5
YDR497C	ITR1	Myo-inositol transporter		2	0	2		0	4	2	4	1	0.5
YDR503C	LPP1	Lipid phosphate phosphatase		1	2	0		1	4	3	4	1	0.75
YDR504C	SPG3	Protein required for survival at high temperature during stationary phase		2	2	0		0	4	2	4	1	0.5
YDR506C	GMC1	meiotic progression		1	0			2	3	2	3	1	0.666667
YDR519W	FKB2, FPR2	Membrane-bound peptidyl-prolyl cis-trans isomerase, binds to the drugs FK506 and rapamycin		0	2	2		0	4	2	4	1	0.5
YDR532C	KRE28	uncharacterized, unknown function		2	2	0		0	4	2	4	1	0.5
YDR537C		dubious		2	0	2		0	4	2	4	1	0.5
YDR538W							2	0	2	1	2	1	0.5
YEL006W	YEA6	Putative mitochondrial NAD+ transporter		0	2	2		0	4	2	4	1	0.5
YEL009C	GCN4, ARG9	Transcriptional activator of amino acid biosynthetic genes in response to amino acid starvation		0	2	2		0	4	2	4	1	0.5
YER032W	FIR1, PIP1	3' mRNA processing		2	0	3	0	0	5	2	5	1	0.4
YER046W	SPO73	Meiosis-specific protein of unknown function		1	2	1		0	4	3	4	1	0.75
YER055C	HIS1	histidine biosynthesis		1	1	2		0	4	3	4	1	0.75
YER056C	FCY2, BRA7	Purine-cytosine permease			1	3	0	0	4	2	4	1	0.5
YER057C	HIG1	Member of the p14.5 prot family with similarity to Mmf1p		0	2	2		0	4	2	4	1	0.5
YER066W		uncharacterized, unknown function			2	2	0	0	4	2	4	1	0.5
YER087C-A	SBH1, SEB1	subunit of Sec61p ER translocating complex		2	0	2	1	0	5	3	5	1	0.6
YER087W		uncharacterized, unknown function		2	0	2		0	4	2	4	1	0.5
YER090W	TRP2	tryptophan biosynthesis		1	2	0			3	2	3	1	0.666667
YER091C-A		dubious		2	1	0			3	2	3	1	0.666667
YER109C	FLO8, PHD5	Transcription factor required for flocculation		2		0	2	0	4	2	4	1	0.5
YER145C	FTR1	transport of iron across the plasma membrane		2	2	0		0	4	2	4	1	0.5
YER151C	UBP3	Ubiquitin-specific protease that interacts with Bre5p to co-regulate anterograde and retrograde transport between endoplasmic reticulum and Golgi compartments		0	2	2		0	4	2	4	1	0.5
YFL051C		uncharacterized, unknown function		2		1	0	1	4	3	4	1	0.75
YFL052W		uncharacterized, unknown function		2	0	0	2	1	5	3	5	1	0.6
YFR039C		uncharacterized, unknown function		4	0	0		0	4	1	4	1	0.25
YFR047C	BNA6	biosynthesis of nicotinic acid		2	0	2		0	4	2	4	1	0.5
YGL016W	KAP122, PDR6	Karyopherin beta		1	3	0		0	4	2	4	1	0.5
YGL019W	CKB1	sbunit of casein kinase 2, cell growth and proliferation		1	2	0		1	4	3	4	1	0.75
YGL020C	GET1	mitochondrial morphology and inheritance		2	2	0		0	4	2	4	1	0.5
YGL026C	TRP5	Tryptophan synthase		2	2		0	0	4	2	4	1	0.5
YGL038C	OCH1, NGD29	Mannosyltransferase of the cis-Golgi apparatus		2	0				2	1	2	1	0.5
YGL045W	RIM8	unknown function		2		0	2	0	4	2	4	1	0.5
YGL046W		unknown function		2	2	0		0	4	2	4	1	0.5
YGL071W	RCS1, AFT1	involved iron utilization and homeostasis		2	0	2		0	4	2	4	1	0.5
YGL080W	FMP37	uncharacterized, unknown function		1		3	0	0	4	2	4	1	0.5
YGL086W	MAD1	spindle-assembly checkpoint		2	0	2		0	4	2	4	1	0.5
YGL089C	MF(ALPHA)2	Mating pheromone alpha-factor		0	2	1		1	4	3	4	1	0.75
YGL114W		uncharacterized, unknown function		1	1		0	2	4	3	4	1	0.75
YGL141W	HUL5	similarity to hect domain E3 ub-protein ligases		2	0	2		0	4	2	4	1	0.5
YGL148W	ARO2	synthesis of aromatic amino acids		2	0	2		0	4	2	4	1	0.5
YGL152C		dubious		2		1		0	3	2	3	1	0.666667
YGL158W	RCK1	involved in the response to oxidative stress		2		0	2	0	4	2	4	1	0.5
YGL160W		uncharacterized, unknown function		2	0	2		0	4	2	4	1	0.5
YGL173C	KEM1	involved in mRNA decay		2	0	2		0	4	2	4	1	0.5
YGL174W	BUD13	involved in bud-site selection		2		2	0	0	4	2	4	1	0.5
YGL205W	POX1, FOX1	Fatty-acyl coenzyme A oxidase		3	1	0		0	4	2	4	1	0.5
YGL214W		dubious		0	1	3		0	4	2	4	1	0.5
YGL224C	SDT1	Pyrimidine nucleotidase		2	2	0		0	4	2	4	1	0.5
YGL235W		uncharacterized, unknown function		0	2	2		0	4	2	4	1	0.5
YGR027C	RPS25A, RPS31A	ribosomal protein		2	0	2		0	4	2	4	1	0.5
YGR028W	MSP1, YTA4	Mitochondrial protein involved in proteins sorting		2	0	2		0	4	2	4	1	0.5
YGR036C	CAX4, CWH8	synthesis and protein N-glycosylation		2	0		2	0	4	2	4	1	0.5
YGR052W	FMP48	uncharacterized, unknown function		2	1	1		0	4	3	4	1	0.75
YGR057C	LST7	involved in a post-Golgi secretory pathway		2	0	2		0	4	2	4	1	0.5
YGR066C		uncharacterized, unknown function		1	1		2	0	4	3	4	1	0.75
YGR069W		dubious			2	0	2	0	4	2	4	1	0.5
YGR076C	MRPL25, YMR26	Mitochondrial ribosomal protein		2	0	0	3	0	5	2	5	1	0.4
YGR077C	PEX8, PAS6	organizer of the peroxisomal import machinery		2	0		2	0	4	2	4	1	0.5
YGR080W	TWF1	actin monomer-sequestering protein involved in regulation of the cortical actin cytoskeleton		2	0	2		0	4	2	4	1	0.5
YGR087C	PDC6	isoform of pyruvate decarboxylase		2	2	0		0	4	2	4	1	0.5
YGR093W		uncharacterized, unknown function		2	0	2		0	4	2	4	1	0.5
YGR097W	ASK10	Component of the RNA polymerase II		2	2	0		0	4	2	4	1	0.5
YGR100W	MDR1, MIC1	GTPase-activating protein for Ypt/Rab transport GTPases; involved in recycling of internalized prot and regulation of Golgi secretory function		2	0	2		0	4	2	4	1	0.5
YGR105W	VMA21	Integral membrane protein that is required for V-ATPase function, although not an actual component of the V-ATPase complex; functions in the assembly of the V-ATPase; localized to the yeast endoplasmic reticulum		0	2	0	2		4	2	4	1	0.5
YGR117C		uncharacterized, unknown function		2	0	2		0	4	2	4	1	0.5
YGR126W		uncharacterized, unknown function		2	2	0		0	4	2	4	1	0.5
YGR150C		uncharacterized, unknown function		0	0	1	3		4	2	4	1	0.5
YGR170W	PSD2	Phosphatidylserine decarboxylase of the Golgi and vacuolar membranes		1	0	0	4	0	5	2	5	1	0.4
YGR188C	BUB1	Protein kinaseinvolved in cell cycle		0	2	2		0	4	2	4	1	0.5
YGR196C	FYV8	unknown function		2	0		2	0	4	2	4	1	0.5
YGR199W	PMT6	Protein O-mannosyltransferase		2	0	0	2		4	2	4	1	0.5
YGR200C	ELP2	Subunit of Elongator complex		2	2	0		0	4	2	4	1	0.5
YGR207C		interacts with frataxin (Yfh1p)		2	2	0		0	4	2	4	1	0.5
YGR208W	SER2	serine and glycine biosynthesis		1	2	0			3	2	3	1	0.666667
YGR209C	TRX2	protects against oxidative and reductive stress		2	2	0		0	4	2	4	1	0.5
YGR219W		dubious		0	2		1		3	2	3	1	0.666667
YGR220C				1					1	1	1	1	1
YGR223C	HSV2	Phosphatidylinositol 3,5-bisP-binding protein		2	1		0		3	2	3	1	0.666667
YGR226C		dubious		1	2	1		0	4	3	4	1	0.75
YGR229C	SMI1	in the regulation of cell wall synthesis		2	0		2	0	4	2	4	1	0.5
YGR238C	KEL2	negative regulation of mitotic exit		2	0	2		0	4	2	4	1	0.5
YGR248W	SOL4	6-phosphogluconolactonase		3	0	1		0	4	2	4	1	0.5
YHL031C	GOS1	v-SNARE protein involved in Golgi transport		0	2	2		0	4	2	4	1	0.5
YHL037C		dubious		1	0			2	3	2	3	1	0.666667
YHL042W		uncharacterized, unknown function		0	0			3	3	1	3	1	0.333333
YHR009C		uncharacterized, unknown function		0	2	2		0	4	2	4	1	0.5
YHR044C	DOG1	-deoxyglucose-6-phosphate phosphatase		0	2	2		0	4	2	4	1	0.5
YHR046C	INM1	Inositol monophosphatase		0	2	2		0	4	2	4	1	0.5
YHR057C	CPR2	Peptidyl-prolyl cis-trans isomerase		0	2	2		0	4	2	4	1	0.5
YHR073W	OSH3	Member of an oxysterol-binding protein family		0	2	2		0	4	2	4	1	0.5
YHR075C	PPE1	Protein with carboxyl methyl esterase activity that may have a role in demethylation of the phosphoprotein phosphatase catalytic subunit		0	2	2		0	4	2	4	1	0.5
YHR079C	IRE1	Serine-threonine kinase and endoribonuclease		0	2	2		0	4	2	4	1	0.5
YHR080C		uncharacterized, unknown function		0	2	2		0	4	2	4	1	0.5
YHR081W	LRP1	exosome activity in the processing of stable RNAs		0	2	2		0	4	2	4	1	0.5
YHR082C	KSP1	Nonessential putative serine/threonine protein kinase		1	2	2	0	0	5	3	5	1	0.6
YHR086W	NAM8	RNA binding protein		0	2	2		0	4	2	4	1	0.5
YHR094C	HXT1	Low-affinity glucose transporter		0	2	2		0	4	2	4	1	0.5
YHR097C		uncharacterized, unknown function		2	0	2		0	4	2	4	1	0.5
YHR110W	ERP5	involved in ER to Golgi transport		0	2	2		0	4	2	4	1	0.5
YHR113W		Cytoplasmic aspartyl aminopeptidase		1	2	0		1	4	3	4	1	0.75
YHR126C		uncharacterized, unknown function		0	2	2		0	4	2	4	1	0.5
YHR142W	CHS7	unknown function		2	2	0		0	4	2	4	1	0.5
YHR147C	MRPL6	Mitochondrial ribosomal protein		0	0	2	3	0	5	2	5	1	0.4
YHR153C	SPO16	unknown function		2	2	0		0	4	2	4	1	0.5
YHR157W	REC104	meiotic recombination		2	0	2		0	4	2	4	1	0.5
YHR176W	FMO1	oxidation of biological thiols		2	0	2		0	4	2	4	1	0.5
YHR184W	SSP1	Protein involved in the control of meiotic nuclear division and coordination of meiosis with spore formation		2	0	2		0	4	2	4	1	0.5
YHR191C	CTF8	sister chromatid cohesion		0	2		1		3	2	3	1	0.666667
YHR194W	MDM31	Mitochondrial inner membrane protein required for normal mitochondrial morphology and inheritance		0	2	2		0	4	2	4	1	0.5
YIL001W		uncharacterized, unknown function		2	0	2		0	4	2	4	1	0.5
YIL008W	URM1	Ubiquitin-like protein		0	2	0	2	1	5	3	5	1	0.6
YIL010W	DOT5	Nuclear thiol peroxidase		0	2	0	1	2	5	3	5	1	0.6
YIL014W	MNT3	MaNnosylTransferase		2	0	2		0	4	2	4	1	0.5
YIL015W	BAR1, SST1	helps cells find mating partners		2	0	2		0	4	2	4	1	0.5
YIL020C	HIS6	catalyzes the fourth step in histidine biosynthesis		0	2	2		0	4	2	4	1	0.5
YIL032C		dubious		3	0	1		0	4	2	4	1	0.5
YIL041W		unknown function		1	0	2	1	1	5	4	5	1	0.8
YIL042C	PKP1			1	0			2	3	2	3	1	0.666667
YIL043C	CBR1, CBR5	Cytochrome b Reductase		2	0	2		0	4	2	4	1	0.5
YIL053W	RHR2, GPP1	glycerol biosynthesis		2	0	2		0	4	2	4	1	0.5
YIL056W	VHR1	Transcriptional activator		2	0	2		0	4	2	4	1	0.5
YIL089W		uncharacterized, unknown function		2	2	0	0	1	5	3	5	1	0.6
YIL097W	FYV10			1				1	2	2	2	1	1
YIL108W		uncharacterized, unknown function		1	2	2	0	0	5	3	5	1	0.6
YIL122W	POG1	Promoter of Growth		3	2	0	0	0	5	2	5	1	0.4
YIL131C	FKH1	Forkhead family transcription factor		2	2	0		0	4	2	4	1	0.5
YIL137C	TMA108	Translation Machinery Associated protein		2	2	0		0	4	2	4	1	0.5
YIL138C	TPM2	isoform of tropomyosin, stabilizes F-actin		2	2	0		0	4	2	4	1	0.5
YIL161W		uncharacterized, unknown function		2	0	0		2	4	2	4	1	0.5
YIL166C		uncharacterized, unknown function		3	0	0		1	4	2	4	1	0.5
YIL167W	SDL1	pseudogene		2	0	2		0	4	2	4	1	0.5
YIL168W		pseudogene		2	0	2		0	4	2	4	1	0.5
YIL170W	HXT12	pseudogene		2	0	2		0	4	2	4	1	0.5
YIL173W	VTH1	vacuolar protein sorting		2	0	2		0	4	2	4	1	0.5
YIR002C	MPH1			1	0			2	3	2	3	1	0.666667
YIR016W		uncharacterized, unknown function		0	2	2		0	4	2	4	1	0.5
YIR018W							1		1	1	1	1	1
YIR028W	DAL4	Allantoin permease		2	0	2		0	4	2	4	1	0.5
YIR030C	DCG1	unknown function		0	2	2		0	4	2	4	1	0.5
YIR033W	MGA2	ER membrane protein involved in regulation of OLE1 transcription		2	0	2		0	4	2	4	1	0.5
YJL017W		uncharacterized, unknown function		2	0	2		0	4	2	4	1	0.5
YJL023C	PET130	Protein required for respiratory growth		0	1			2	3	2	3	1	0.666667
YJL063C	MRPL8	Mitochondrial ribosomal protein		0	2	2		0	4	2	4	1	0.5
YJL082W	IML2	unknown function		0	2	2		0	4	2	4	1	0.5
YJL083W	TAX4	Protein involved in regulation of [phosphatidylinositol 4,5-bisphosphate]			2	0	2	0	4	2	4	1	0.5
YJL084C	ALY2	Cytoplasmic protein of unknown function that interacts with the cyclin Pcl7p		0	2	2		0	4	2	4	1	0.5
YJL095W	BCK1, SSP31	MAP kinase		0	2	2		0	4	2	4	1	0.5
YJL124C	LSM1, SPB8	degradation of cytoplasmic mRNAs		1	1		2	0	4	3	4	1	0.75
YJL130C	URA2	biosynthesis of pyrimidines		0	2	2		0	4	2	4	1	0.5
YJL131C		uncharacterized, unknown function	3	3			0	0	3	1	3	1	0.333333
YJL132W		uncharacterized, unknown function		2	0	2		0	4	2	4	1	0.5
YJL133W	MRS3	mitochondrial iron transporteur	3	3	1		0	0	4	2	4	1	0.5
YJL135W		dubious		0	2	2		0	4	2	4	1	0.5
YJL169W		dubious		0	2	2		0	4	2	4	1	0.5
YJL172W	CPS1	Vacuolar carboxypeptidase		3	0	1		0	4	2	4	1	0.5
YJL184W	GON7	modification of N-linked oligosaccharides, osmotic stress response, telomere uncapping and elongation, transcription		2	0	2		0	4	2	4	1	0.5
YJL196C	ELO1	Elongase I		0	2		2	0	4	2	4	1	0.5
YJL197W	UBP12	Ubiquitin-specific protease		0	2	0	2	1	5	3	5	1	0.6
YJL200C	ACO2	Putative mitochondrial aconitase		0	2	2		0	4	2	4	1	0.5
YJL216C		uncharacterized, unknown function		0	2	2		0	4	2	4	1	0.5
YJR015W		uncharacterized, unknown function		1		2		0	3	2	3	1	0.666667
YJR034W	PET191	assembly of cytochrome c oxidase		0	1			2	3	2	3	1	0.666667
YJR039W		uncharacterized, unknown function		2	0	2		0	4	2	4	1	0.5
YJR054W		uncharacterized, unknown function		1	0			2	3	2	3	1	0.666667
YJR056C		uncharacterized, unknown function		2	0	1		1	4	3	4	1	0.75
YJR059W	PTK2, STK2			1	1			1	3	3	3	1	1
YJR060W	CBF1, CPF1	nucleosome positioning		2	0	2		0	4	2	4	1	0.5
YJR110W	YMR1	Phosphatidylinositol 3-phosphate [PI(3)P] phosphatase, regulates the localization and levels of PI(3)P; involved in cytoplasm to vacuole (CVT) transport		0	0	2	3	0	5	2	5	1	0.4
YJR113C	RSM7	Mitochondrial ribosomal protein		2	0	2		0	4	2	4	1	0.5
YJR134C	SGM1	unknown function, localizes to COPI coated vesicles		1	0	3		0	4	2	4	1	0.5
YKL002W	DID4	Class E Vps protein of the ESCRT-III complex, required for sorting of integral membrane proteins into lumenal vesicles of MVB, and for delivery of newly synthesized vacuolar enzymes to the vacuole, involved in endocytosis		0	2	2		0	4	2	4	1	0.5
YKL006W	RPL14A	ribosomal protein		0	2	2		0	4	2	4	1	0.5
YKL054C	VID31			0	0			3	3	1	3	1	0.333333
YKL057C	NUP120, RAT2			1	0			2	3	2	3	1	0.666667
YKL077W		uncharacterized, unknown function		3	0	0	2	0	5	2	5	1	0.4
YKL080W	VMA5, VAT3	subunit V1 of vacuolar H+-ATPase (V-ATPase)		2	0	0	2		4	2	4	1	0.5
YKL084W				1		1	0	2	4	3	4	1	0.75
YKL129C	MYO3	One of two type I myosins		1	0			2	3	2	3	1	0.666667
YKL135C	APL2	sb of the clathrin-associated prot (AP-1) complex		2	0	2		0	4	2	4	1	0.5
YKL174C	TPO5	Transport of polyamines		2	0	2		0	4	2	4	1	0.5
YKL202W		dubious		3	0	0		1	4	2	4	1	0.5
YKL204W	EAP1	inhibits cap-dependent translation		2	0	0		2	4	2	4	1	0.5
YKR006C	MRPL13, YML13	Mitochondrial ribosomal protein		0	2	2		0	4	2	4	1	0.5
YKR010C	TOF2	unknown function		2	0	2		0	4	2	4	1	0.5
YKR014C	YPT52	GTPase, similar to Ypt51p and Ypt53p and to mammalian rab5; required for vacuolar protein sorting and endocytosis		0	2	2		0	4	2	4	1	0.5
YKR020W	VPS51	Component of the Golgi-associated retrograde protein complex, Vps51p-Vps52p-Vps53p-Vps54p, which is required for the recycling of proteins from endosomes to the late Golgi		0	2	2		0	4	2	4	1	0.5
YKR026C	GCN3, AAS2	Alpha subunit of the translation initiation factor eIF2B		1	1		2	0	4	3	4	1	0.75
YKR031C	SPO14, PLD1	Phospholipase D, sporulation		2	2		0	0	4	2	4	1	0.5
YKR050W	TRK2, RPD2	Component of the Trk1p-Trk2p potassium transport system		1	2	0			3	2	3	1	0.666667
YKR070W		uncharacterized, unknown function		2	2	0		0	4	2	4	1	0.5
YKR085C	MRPL20, YML20	Mitochondrial ribosomal protein		2	1	1		0	4	3	4	1	0.75
YKR088C	TVP38	Integral membrane protein localized to late Golgi vesicles along with the v-SNARE Tlg2p		0	2	2		0	4	2	4	1	0.5
YKR095W	MLP1, MPL1	Myosin-like protein associated with the nuclear envelope		0	2	2		0	4	2	4	1	0.5
YKR096W		uncharacterized, unknown function		0	2	2		0	4	2	4	1	0.5
YLL007C		uncharacterized, unknown function		0	2	2		0	4	2	4	1	0.5
YLL014W		unknown function		1	0	2	2	0	5	3	5	1	0.6
YLL047W		dubious		2	1	1		0	4	3	4	1	0.75
YLL052C	AQY2	Water channel that mediates the transport of water across cell membranes		0		2	2	0	4	2	4	1	0.5
YLL055W	YCT1	High-affinity cysteine-specific transporter		0		2	2	0	4	2	4	1	0.5
YLL063C	AYT1	Acetyltransferase		0		2	2	0	4	2	4	1	0.5
YLR011W	LOT6	quinone detoxification		0		2	2	0	4	2	4	1	0.5
YLR018C	POM34	protein of the nuclear pore		2	0	1	2	0	5	3	5	1	0.6
YLR046C		uncharacterized, unknown function		2				0	2	1	2	1	0.5
YLR079W	SIC1	CDK inhibitor of Cdc28/Clb; prevents premature S phase		2				0	2	1	2	1	0.5
YLR081W	GAL2	Galactose permease		2	0	2		0	4	2	4	1	0.5
YLR130C	ZRT2	zinc transporter of the plasma membrane		2		0	2	0	4	2	4	1	0.5
YLR131C	ACE2	Transcription factor		3	0	0		1	4	2	4	1	0.5
YLR133W	CKI1	Choline kinase		2		0	2	0	4	2	4	1	0.5
YLR178C	TFS1, DKA1	Carboxypeptidase Y inhibitor		2	0	2		0	4	2	4	1	0.5
YLR180W	SAM1, ETH10	S-adenosylmethionine synthetase		1			2	0	3	2	3	1	0.666667
YLR221C	RSA3	Protein with a likely role in ribosomal maturation			2	0	2	0	4	2	4	1	0.5
YLR246W	ERF2			1	0			2	3	2	3	1	0.666667
YLR252W		dubious		2	0	0	2		4	2	4	1	0.5
YLR284C	ECI1	Peroxisomal delta3,delta2-enoyl-CoA isomerase		1	1		2	0	4	3	4	1	0.75
YLR288C	MEC3, PIP3	DNA damage and meiotic pachytene checkpoint protein		0	2	2		0	4	2	4	1	0.5
YLR290C					2	0		1	3	2	3	1	0.666667
YLR309C	IMH1, SYS3	Protein involved in vesicular transport, mediates transport between an endosomal compartment and the Golgi		0	3	1		0	4	2	4	1	0.5
YLR312C	QNQ1	uncharacterized, unknown function		0	2	0	2	1	5	3	5	1	0.6
YLR312W-A	MRPL15	Mitochondrial Ribosomal Protein		0	2	2		0	4	2	4	1	0.5
YLR330W	CHS5, CAL3	export from the Golgi to plasma membrane		2	0	0		2	4	2	4	1	0.5
YLR332W	MID2, KAI1	O-glycosylated plasma membrane protein that acts as a sensor for cell wall integrity		0	2	2		0	4	2	4	1	0.5
YLR346C		uncharacterized, unknown function		2	0	1		1	4	3	4	1	0.75
YLR375W	STP3	Zinc-finger protein of unknown function		1	2	1		0	4	3	4	1	0.75
YLR381W	CITF3	Outer kinetochore protein		2	0	2		0	4	2	4	1	0.5
YLR388W	RPS29A	ribosomal protein		0	2	2		0	4	2	4	1	0.5
YLR390W	ECM19	unknown function		2	1	1		0	4	3	4	1	0.75
YLR390W-A	CCW14, SSR1	Covalently linked cell wall glycoprotein		0	2	2		0	4	2	4	1	0.5
YLR395C	COX8	Subunit of cytochrome c oxidase,		2	0	0	3	0	5	2	5	1	0.4
YLR402W		dubious		1	0	3		0	4	2	4	1	0.5
YLR416C		dubious				3	0	0	3	1	3	1	0.333333
YLR439W	MRPL4, YML4	Mitochondrial ribosomal protein		0	2	2		0	4	2	4	1	0.5
YLR442C		to establish a transcriptionally silent chromatin		2	0	2		0	4	2	4	1	0.5
YLR443W	ECM7	Non-essential protein of unknown function		2	2	0		0	4	2	4	1	0.5
YLR446W		uncharacterized, unknown function		2			0	1	3	2	3	1	0.666667
YML003W		uncharacterized, unknown function		0		2	2	0	4	2	4	1	0.5
YML014W	TRM9	tRNA methyltransferase				0	1	2	3	2	3	1	0.666667
YML019W	OST6	catalyzes asparagine-linked glycosylation			0	0	2	2	4	2	4	1	0.5
YML035C	AMD1, AMD3	AMP deaminase		0	2	2		0	4	2	4	1	0.5
YML053C								1	1	1	1	1	1
YML066C	SPO77, SMA2	Spore Membrane Assembly		2	1			0	3	2	3	1	0.666667
YML095C-A		dubious		1	0			2	3	2	3	1	0.666667
YMR023C	MSS1, PET53	Mitochondrial protein		0		2	2	0	4	2	4	1	0.5
YMR032W	HOF1, CYK2	Bud neck-localized, required for cytokinesis; regulates actomyosin ring dynamics and septin localization		0	2	2		0	4	2	4	1	0.5
YMR077C	VPS20					0	0	3	3	1	3	1	0.333333
YMR091C	NPL6			1				1	2	2	2	1	1
YMR123W	PKR1	V-ATPase assembly factor			3	1	0	0	4	2	4	1	0.5
YMR124W		uncharacterized, unknown function		4	0	0		0	4	1	4	1	0.25
YMR130W		uncharacterized, unknown function		4	0	0		0	4	1	4	1	0.25
YMR141C	SIP5 promotor	SIP5=Protein of unknown function; interacts with both the Reg1p/Glc7p phosphatase and the Snf1p kinase; moderate enrichment around vacuoles		0		2	1		3	2	3	1	0.666667
YMR143W	RPS16A	ribosomal protein		0		2	1	1	4	3	4	1	0.75
YMR145C	NDE1	Mitochondrial external NADH dehydrogenase		0		2	2	0	4	2	4	1	0.5
YMR147W		uncharacterized, unknown function		0		2	2	0	4	2	4	1	0.5
YMR148W		uncharacterized, unknown function		0		2	2	0	4	2	4	1	0.5
YMR154C	RIM13, CPL1	Calpain-like cysteine protease involved in proteolytic activation of Rim101p in response to alkaline pH		0	2	2		0	4	2	4	1	0.5
YMR156C	TPP1	in repair of endogenousDNA damage		0	2	2		0	4	2	4	1	0.5
YMR157C	FMP39	uncharacterized, unknown function		0	2	2		0	4	2	4	1	0.5
YMR215W	GAS3	Putative 1,3-beta-glucanosyltransferase		0	2	2		0	4	2	4	1	0.5
YMR231W	VAM1, VPS11	Peripheral vacuolar membrane prot required for prot trafficking and vacuole biogenesis; forms complex with Pep3p that promotes vesicular docking/fusion reactions in SNARE proteins		0	2	2		0	4	2	4	1	0.5
YMR267W	PPA2, IPP2	Mitochondrial inorganic pyrophosphatase		0		2	2	0	4	2	4	1	0.5
YMR269W	TMA23	unknown function		0		2	2	0	4	2	4	1	0.5
YMR271C	URA10	biosynthesis of pyrimidines		0	2	2		0	4	2	4	1	0.5
YMR282C	AEP2, ATP13	unknown function		0		2	2	0	4	2	4	1	0.5
YMR291W		uncharacterized, unknown function		0	2	2		0	4	2	4	1	0.5
YMR292W	GOT1	non-essential protein present in early Golgi that may be involved in ER-Golgi transport		0	2	2		0	4	2	4	1	0.5
YMR293C		uncharacterized, unknown function		0	2	2		0	4	2	4	1	0.5
YMR294W	JNM1, INS1	nuclear migration and spindle partitioning		0	2	2		0	4	2	4	1	0.5
YMR294W-A		dubious		0	2	2		0	4	2	4	1	0.5
YMR303C	ADH2, ADR2	Glucose-repressible alcohol dehydrogenase II		0	2	2	1	0	5	3	5	1	0.6
YNL003C	PET8	S-adenosylmethionine transporter of the mitochondrial inner membrane		1	0	2			3	2	3	1	0.666667
YNL009W	IDP3	growth on unsaturated fatty acids		2	0	2		0	4	2	4	1	0.5
YNL043C				0	2				2	1	2	1	0.5
YNL044W	YIP3	Protein localized to COPII vesicles, proposed to be involved in ER to Golgi transport; interacts with members of the Rab GTPase family		1	3	0		0	4	2	4	1	0.5
YNL064C	YDJ1	chaperone involved in protein translocation		2			0		2	1	2	1	0.5
YNL066W	SUN4	Cell wall protein related to glucanases		2	0		2	0	4	2	4	1	0.5
YNL076W	MKS1						0	2	2	1	2	1	0.5
YNL122C		uncharacterized, unknown function		1		0	2		3	2	3	1	0.666667
YNL123W						0	2		2	1	2	1	0.5
YNL125C	ESBP6	similarity to monocarboxylate permeases		0	2	2		0	4	2	4	1	0.5
YNL130C	CPT1	Cholinephosphotransferase		0	3	1		0	4	2	4	1	0.5
YNL191W	DUG3	Probable glutamine amidotransferase		0	2	1		1	4	3	4	1	0.75
YNL211C		uncharacterized, unknown function		2	0	2	0	1	5	3	5	1	0.6
YNL212W	VID27	Cytoplasmic protein of unknown function; possibly involved in vacuolar protein degradation		1	2	0	0	2	5	3	5	1	0.6
YNL227C				0	1			2	3	2	3	1	0.666667
YNL231C	PDR16	Phosphatidylinositol transfer protein		0	2	2		0	4	2	4	1	0.5
YNL236W	SIN4, GAL22	Subunit of the Mediator complex		0		2	2	0	4	2	4	1	0.5
YNL237W	YTP1			0	1			2	3	2	3	1	0.666667
YNL239W	LAP3, GAL6	Cysteine aminopeptidase		0	1	2	2	0	5	3	5	1	0.6
YNL246W	VPS75	proposed role in vacuolar protein sorting		0	0	2	2		4	2	4	1	0.5
YNL250W	RAD50	processing double-strand DNA breaks		1	2	2	0	0	5	3	5	1	0.6
YNL274C	GOR1	Glyoxylate reductase		0	2	2		0	4	2	4	1	0.5
YNL294C	RIM21	cell wall construction and alkaline pH response		0	2	2		0	4	2	4	1	0.5
YNL296W	KRE25	dubious		0	1	2	2	0	5	3	5	1	0.6
YNL321W				0	1			2	3	2	3	1	0.666667
YNL330C	RPD3, REC3	Histone deacetylase		0	2	2		0	4	2	4	1	0.5
YNR006W	VPS27, SSV17	recycling Golgi proteins		1	0			2	3	2	3	1	0.666667
YNR019W	ARE2, SAT1	Acyl-CoA:sterol acyltransferase			2	0	2	0	4	2	4	1	0.5
YNR075W	COS10			0			0	3	3	1	3	1	0.333333
YOL002C	IZH2	zinc metabolism and osmotin-induced apoptosis		0	2	2		0	4	2	4	1	0.5
YOL020W	TAT2	High affinity tryptophan and tyrosine permease		0	2	1			3	2	3	1	0.666667
YOL031C	SIL1	Nucleotide exchange factor for the ER		0	2	2		0	4	2	4	1	0.5
YOL037C		dubious		0	2	2		0	4	2	4	1	0.5
YOL083W		uncharacterized, unknown function		0		2	2	0	4	2	4	1	0.5
YOL101C	IZH4	Membrane protein involved in zinc metabolism		2	1	1		0	4	3	4	1	0.75
YOL107W		uncharacterized, unknown function		0	2	0	2	1	5	3	5	1	0.6
YOL110W	SHR5	Subunit of a palmitoyltransferase		0	2	0	2	1	5	3	5	1	0.6
YOL117W	RRI2	in the mating pheromone response		2		2	0	0	4	2	4	1	0.5
YOL152W	FRE7	Putative ferric reductase		2	2	0		0	4	2	4	1	0.5
YOR015W		dubious		2	0	2		0	4	2	4	1	0.5
YOR026W	BUB3	Kinetochore checkpoint WD40 repeat protein		2	1	0	2	0	5	3	5	1	0.6
YOR062C				1	1			1	3	3	3	1	1
YOR078W	BUD21	Component of small ribosomal subunit		2	2	0		0	4	2	4	1	0.5
YOR085W	OST3	asparagine-linked glycosylation		2	0	2		0	4	2	4	1	0.5
YOR088W		merged with YOR087W		1	2	0	0	2	5	3	5	1	0.6
YOR121C		dubious		2	0	0		2	4	2	4	1	0.5
YOR125C	CAT5	ubiquinone synthesis		2	1	1		0	4	3	4	1	0.75
YOR127W	RGA1	GTPase-activating protein for Cdc42p; implicated in control of septin organization		1		2	0	1	4	3	4	1	0.75
YOR141C	ARP8	Nuclear actin-related protein involved in chromatin remodeling		0		2	1	1	4	3	4	1	0.75
YOR147W	MDM32	normal mitochondrial morphology and inheritance		0	2	2		0	4	2	4	1	0.5
YOR161C	PNS1	unknown function		0		1	2		3	2	3	1	0.666667
YOR178C	GAC1	Regulatory subunit for Glc7p		2	0	1	2	0	5	3	5	1	0.6
YOR179C	SYC1	3' end formation of RNAs		2	0	2		0	4	2	4	1	0.5
YOR188W	MSB1	Multicopy Suppressor of a Budding defect		0	2	0	2	1	5	3	5	1	0.6
YOR205C	FMP38	uncharacterized, unknown function		0	2	2		0	4	2	4	1	0.5
YOR215C				0	1			2	3	2	3	1	0.666667
YOR216C	RUD3	cis-Golgi structural organization		0	2	2	1	0	5	3	5	1	0.6
YOR245C	DGA1	Diacylglycerol acyltransferase		0	2	2		0	4	2	4	1	0.5
YOR266W	PNT1	Mitochondrial inner membrane protein involved in export		1	3		0	0	4	2	4	1	0.5
YOR296W		uncharacterized, unknown function		1	0	1		2	4	3	4	1	0.75
YOR305W		uncharacterized, unknown function		0		2	2	0	4	2	4	1	0.5
YOR333C		dubious		0	2	1	2	0	5	3	5	1	0.6
YOR348C	PUT4	Proline permease		0	2	2		0	4	2	4	1	0.5
YOR380W	RDR1	control of multidrug resistance		0	2	2		0	4	2	4	1	0.5
YOR385W		uncharacterized, unknown function		0	2	2		0	4	2	4	1	0.5
YPL034W		uncharacterized, unknown function		1	3	0		0	4	2	4	1	0.5
YPL040C	ISM1	Mitochondrial isoleucyl-tRNA synthetase		0	0	2	3	0	5	2	5	1	0.4
YPL091W	GLR1	glutathione oxidoreductase		2	0	2		0	4	2	4	1	0.5
YPL095C	EEB1	Acyl-coenzymeA		1	2	1		0	4	3	4	1	0.75
YPL097W	MSY1	Mitochondrial tyrosyl-tRNA synthetase		0	2	2		0	4	2	4	1	0.5
YPL112C	PEX25	Peripheral peroxisomal membrane peroxin required for the regulation of peroxisome size and maintenance, recruits GTPase Rho1p to peroxisomes		0	2	2		0	4	2	4	1	0.5
YPL168W		uncharacterized, unknown function			2	0	2	0	4	2	4	1	0.5
YPL174C	NIP100	partioning the mitotic spindle		2	1	2	0	0	5	3	5	1	0.6
YPL178W	CBC2	package mRNA for export		1	0	2	2	0	5	3	5	1	0.6
YPL183W-A		uncharacterized, unknown function		2	0	2		0	4	2	4	1	0.5
YPL194W	DDC1	DNA damage checkpoint protein		0	2	2		0	4	2	4	1	0.5
YPL201C	YIG1	anaerobic glycerol production		0	0	2	0	3	5	2	5	1	0.4
YPL205C				1	1			1	3	3	3	1	1
YPL206C		phosphatidylcholine metabolism		2	0	1		1	4	3	4	1	0.75
YPL223C	GRE1	Hydrophilin of unknown function		0	2	1		1	4	3	4	1	0.75
YPL226W	NEW1	ATP binding cassette family member		0	0	2	2	1	5	3	5	1	0.6
YPL234C	VMA11	Vacuolar ATPase V0 domain subunit c'		0	2	2		0	4	2	4	1	0.5
YPL241C	CIN2	Tubulin folding factor C (putative)		0	2	2		0	4	2	4	1	0.5
YPL261C		dubious		1	3	0	1	0	5	3	5	1	0.6
YPL264C		uncharacterized, unknown function		1	2	0	2	0	5	3	5	1	0.6
YPL273W	SAM4	methionine/AdoMet ratio control		2	2	0		0	4	2	4	1	0.5
YPR042C	PUF2			1					1	1	1	1	1
YPR093C	ASR1	alcohol stress response		2		0	2	0	4	2	4	1	0.5
YPR131C	NAT3	Catalytic subunit of the NatB N-terminal acetyltransferase		0	2	2		0	4	2	4	1	0.5
YPR173C	VPS4	AAA-ATPase involved in MVB protein sorting		0	1			2	3	2	3	1	0.666667
	MSB3			0	0			3	3	1	3	1	0.333333
	AFT2			0	0			3	3	1	3	1	0.333333
	CSM4			0	0			3	3	1	3	1	0.333333
	PDR18			0	0			3	3	1	3	1	0.333333
YBL043W	ECM13	unknown function		2	0	0	2	0	4	2	5	0.8	0.4
YCL007C		dubious		2	0	0	2	0	4	2	5	0.8	0.4
YDL059C	RAD59	repair of double-strand breaks in DNA		0	2	0	2	0	4	2	5	0.8	0.4
YDL069C	CBS1	MP prot that interacts with translating ribosomes		2	0	0	2	0	4	2	5	0.8	0.4
YDL080C	THI3, KID1	Probable decarboxylase		2	0	0	2	0	4	2	5	0.8	0.4
YDL168W	SFA1	alcohol dehydrogenase, glutathione-dependent formaldehyde dehydrogenase		2	0	0	2	0	4	2	5	0.8	0.4
YDL170W	UGA3	Transcriptional activator for gamma-aminobutyrate		0	2	0	2	0	4	2	5	0.8	0.4
YDL176W		uncharacterized, unknown function		2	0	0	2	0	4	2	5	0.8	0.4
YDL178W	AIP2, DLD2	D-lactate dehydrogenase		2	0	0	2	0	4	2	5	0.8	0.4
YDL190C	UFD2	cooperates with a ubiquitin-activating enzyme		2	0	0	2	0	4	2	5	0.8	0.4
YDR028C	REG1, HEX2	Regulatory subunit of Glc7p		0	0	2	2	0	4	2	5	0.8	0.4
YDR069C	DOA4, SSV7	Ubiquitin hydrolase		2	0	0	0	2	4	2	5	0.8	0.4
YDR229W	IVY1	Phospholipid-binding protein that interacts with both Ypt7p and Vps33p		2	0	0	2	0	4	2	5	0.8	0.4
YDR248C		uncharacterized, unknown function		2	0	0	2	0	4	2	5	0.8	0.4
YDR250C		dubious		2	0	0	1	1	4	3	5	0.8	0.6
YDR372C	VPS74	unknown function involved in vacuolar protein sorting		2	0	0	2	0	4	2	5	0.8	0.4
YDR399W	HPT1, BRA6	inosine monophosphate and guanosine monophosphate formation		2	0	0	2	0	4	2	5	0.8	0.4
YDR420W	HKR1	bud site selection		0	2	0	2	0	4	2	5	0.8	0.4
YDR431W		dubious		0	2	0	2	0	4	2	5	0.8	0.4
YDR452W	PHM5, PPN1	Vacuolar endopolyphosphatase with a role in phosphate metabolism		0	2	0	2	0	4	2	5	0.8	0.4
YDR513W	TTR1, GRX2	maintaining redox state of target proteins		3	0	0	0	1	4	2	5	0.8	0.4
YDR534C	FIT1	Mannoprotein		0	0	2	2	0	4	2	5	0.8	0.4
YER058W	PET117	Protein required for assembly of cytochrome c oxidase		1	1	2	0	0	4	3	5	0.8	0.6
YER085C		uncharacterized, unknown function		0	0	2	2	0	4	2	5	0.8	0.4
YFR008W	FAR7	Protein involved in G1 cell cycle arrest		0	0	2	2	0	4	2	5	0.8	0.4
YGL024W		dubious		0	0	2	2	0	4	2	5	0.8	0.4
YGL050W	TYW3	uncharacterized, unknown function		2	0	0	2	0	4	2	5	0.8	0.4
YGL212W	VAM7	t-SNARE on vacuole		2	0	0	2	0	4	2	5	0.8	0.4
YGL215W	CLG1	Cyclin-like protein that interacts with Pho85p		2	0	0	2	0	4	2	5	0.8	0.4
YGL220W		uncharacterized, unknown function		1	0	0	3	0	4	2	5	0.8	0.4
YGL221C	NIF3	unknown function		2	0	0	2	0	4	2	5	0.8	0.4
YGL222C	EDC1	RNA-binding protein		2	0	0	2	0	4	2	5	0.8	0.4
YGL226C-A	OST5	subunit of the oligosaccharyltransferase complex of the ER lumen		0	0	2	2	0	4	2	5	0.8	0.4
YGR025W		dubious		0	0	2	2	0	4	2	5	0.8	0.4
YGR043C	NQM1	uncharacterized, unknown function		2	0	0	2	0	4	2	5	0.8	0.4
YGR045C		dubious		2	0	0	2	0	4	2	5	0.8	0.4
YGR070W	ROM1, SKC1	GDP/GTP exchange protein (GEP) for Rho1p		2	0	0	2	0	4	2	5	0.8	0.4
YGR085C	RPL11B	ribosomal protein		2	0	0	0	2	4	2	5	0.8	0.4
YGR130C		uncharacterized, unknown function		0	2	0	2	0	4	2	5	0.8	0.4
YGR139W		dubious		2	0	0	2	0	4	2	5	0.8	0.4
YGR197C	SNG1	involved in multidrug resistance		2	0	0	2	0	4	2	5	0.8	0.4
YGR202C	PCT1, BSR2	phosphatidylcholine synthesis		2	0	0	2	0	4	2	5	0.8	0.4
YGR221C	TOS2	involved in localization of Cdc24p to the site of bud growth		0	2	0	2	0	4	2	5	0.8	0.4
YHL046C	PAU13	unknown function		0	2	1	0	1	4	3	5	0.8	0.6
YHR011W	DIA4	Probable mitochondrial seryl-tRNA synthetase		0	2	2	0	0	4	2	5	0.8	0.4
YHR045W		uncharacterized, unknown function		0	2	0	2	0	4	2	5	0.8	0.4
YIL028W		dubious		0	2	0	0	2	4	2	5	0.8	0.4
YIR004W	DPJ1	Cytosolic J-domain-containing protein, required for peroxisomal protein import and involved in peroxisome assembly		0	2	0	1	1	4	3	5	0.8	0.6
YIR005W	IST3	Component of the U2 snRNP		0	2	2	0	0	4	2	5	0.8	0.4
YKL120W	OAC1	Mitochondrial inner membrane transporter		0	0	3	1	0	4	2	5	0.8	0.4
YKL169C		dubious		0	2	0	2	0	4	2	5	0.8	0.4
YKL184W	SPE1, ORD1, SPE10	polyamine biosynthesis		0	0	0	0	4	4	1	5	0.8	0.2
YKL198C	PTK1, KKT8, STK1	Putative serine/threonine protein kinase		0	2	0	2	0	4	2	5	0.8	0.4
YKR060W	UPT30	maturation of pre-18S rRNA		0	2	0	2	0	4	2	5	0.8	0.4
YLL015W	BPT1	transport bilirubin, heavy metal detoxification		0	0	2	2	0	4	2	5	0.8	0.4
YLL032C		uncharacterized, unknown function		0	0	2	2	0	4	2	5	0.8	0.4
YLR120C	YPS1	Aspartic protease		2	0	0	2	0	4	2	5	0.8	0.4
YLR144C	ACF2	Intracellular beta-1,3-endoglucanase, expression is induced during sporulation; may have a role in cortical actin cytoskeleton assembly		0	0	2	2	0	4	2	5	0.8	0.4
YLR204W	QRI5	Mitochondrial protein of unknown function		0	0	2	2	0	4	2	5	0.8	0.4
YLR278C		uncharacterized, unknown function		0	2	0	2	0	4	2	5	0.8	0.4
YLR356W		uncharacterized, unknown function		0	2	0	2	0	4	2	5	0.8	0.4
YML122C		dubious		0	2	0	2	0	4	2	5	0.8	0.4
YMR025W	CSI1	required for deneddylation		0	1	2	0	1	4	3	5	0.8	0.6
YMR186W	HSC82	Cytoplasmic chaperone of the Hsp90 family		0	0	2	1	1	4	3	5	0.8	0.6
YMR228W	MTF1	Mitochondrial RNA polymerase		0	1	2	1	0	4	3	5	0.8	0.6
YNL022C		uncharacterized, unknown function		2	0	0	2	0	4	2	5	0.8	0.4
YNL177C	MRPL22	Mitochondrial ribosomal protein		0	2	1	1	0	4	3	5	0.8	0.6
YNL194C				1	0	1	0	2	4	3	5	0.8	0.6
YNL217W		uncharacterized, unknown function		2	0	1	0	1	4	3	5	0.8	0.6
YNL241C	ZWF1, MET19	Glucose-6-phosphate dehydrogenase		0	0	2	2	0	4	2	5	0.8	0.4
YNL248C	RPA49	RNA polymerase I subunit A49		0	2	2	0	0	4	2	5	0.8	0.4
YNL253W	TEX1	mRNA export		0	1	2	1	0	4	3	5	0.8	0.6
YNL266W		dubious		0	2	0	2	0	4	2	5	0.8	0.4
YNL305C		uncharacterized, unknown function		0	2	2	0	0	4	2	5	0.8	0.4
YNL328C	MDJ2	mitochondrial import motor constituent		3	0	0	1	0	4	2	5	0.8	0.4
YNR014W		uncharacterized, unknown function		0	2	0	2	0	4	2	5	0.8	0.4
YOL012C	HTZ1	Histone variant H2AZ		0	0	2	2	0	4	2	5	0.8	0.4
YOL033W	MSE1	Mitochondrial glutamyl-tRNA synthetase		0	2	0	2	0	4	2	5	0.8	0.4
YOL052C	SPE2	S-adenosylmethionine decarboxylase		1	0	1	2	0	4	3	5	0.8	0.6
YOL091W	SPO21			0	2	0	0	2	4	2	5	0.8	0.4
YOR017W	PET127	mitochondrial RNA stability and/or processing		0	0	2	2	0	4	2	5	0.8	0.4
YOR032C	HMS1	similarity to myc-family transcription factors		0	2	0	2	0	4	2	5	0.8	0.4
YOR156C				2	0	2	0	0	4	2	5	0.8	0.4
YOR158W	PET123	mitochondrial ribosomal protein		0	0	2	2	0	4	2	5	0.8	0.4
YOR167C	RPS28A	component of 40S ribosomal sbunit		2	0	0	0	2	4	2	5	0.8	0.4
YOR184W	SER1	3-phosphoserine aminotransferase		0	0	1	2	1	4	3	5	0.8	0.6
YOR199W		dubious		0	0	2	2	0	4	2	5	0.8	0.4
YOR208W	PTP2	inactivation of mitogen-activated protein kinase		0	2	2	0	0	4	2	5	0.8	0.4
YOR308C	SUN66	pre-mRNA splicing via spliceosome		0	0	2	2	0	4	2	5	0.8	0.4
YOR330C	MIP1	Catalytic subunit of the mitochondrial DNA pol.		0	2	0	2	0	4	2	5	0.8	0.4
YOR334W	MRS2	Mitochondrial inner membrane Mg(2+) channel		0	1	1	2	0	4	3	5	0.8	0.6
YOR374W	ALD4	Mitochondrial aldehyde dehydrogenase		2	2	0	0	0	4	2	5	0.8	0.4
YPL029W	SUV3	ATP-dependent RNA helicase		0	2	0	2	0	4	2	5	0.8	0.4
YPL100W	ATG21	Phosphatidylinositol 3,5-bisphosphate-binding protein		0	2	2	0	0	4	2	5	0.8	0.4
YPL154C	PEP4	Vacuolar aspartyl protease (proteinase A)		0	4	0	0	0	4	1	5	0.8	0.2
YPL157W	TGS1	Trimethyl guanosine synthase		1	2	1	0	0	4	3	5	0.8	0.6
YPL173W	MRPL40	Mitochondrial ribosomal protein		0	2	1	1	0	4	3	5	0.8	0.6
YPR032W	SRO7, SOP1	Putative effector of Rab GTPase Sec4p, involved in exocytosis and docking and fusion of post-Golgi vesicles with plasma membrane		2	0	0	2	0	4	2	5	0.8	0.4
YPR070W	MED1	Subunit of the RNA poly. II mediator complex		2	0	2	0	0	4	2	5	0.8	0.4
YBL021C	HAP3	Subunit of the heme-activated		1	2	0		0	3	2	4	0.75	0.5
YBL049W	MOH1	unknown function		0	2	1		0	3	2	4	0.75	0.5
YBR132C	AGP2	High affinity polyamine permease		1	0	2		0	3	2	4	0.75	0.5
YBR177C	ETH1	Acyl-coenzymeA		0	2	1		0	3	2	4	0.75	0.5
YBR181C	RPS6B	ribosomal protein		0	0	0		3	3	1	4	0.75	0.25
YBR201W	DER1	ER-associated protein degradation of misfolded proteins		0	0		0	3	3	1	4	0.75	0.25
YBR217W	ATG12	Ubiquitin-like modifier, essential for autophagy		1	0	2		0	3	2	4	0.75	0.5
YBR218C	PYC2	Pyruvate carboxylase isoform		2	1	0		0	3	2	4	0.75	0.5
YBR293W	VBA2	Permease of basic amino acids in the vacuolar membrane		2	1	0		0	3	2	4	0.75	0.5
YBR299W	MAL32, MAL3S	Maltase (alpha-D-glucosidase)		0	2	1		0	3	2	4	0.75	0.5
YCL029C	BIK1	Microtubule-associated protein, component of the interface between microtubules and kinetochore, involved in sister chromatid separation		1	2	0		0	3	2	4	0.75	0.5
YCL040W	GLK1	Glucokinase		1	2		0	0	3	2	4	0.75	0.5
YCL045C		uncharacterized, unknown function		1	2		0	0	3	2	4	0.75	0.5
YCL062W		merged with YCL063W		0	2	1		0	3	2	4	0.75	0.5
YCR007C		uncharacterized, unknown function		1	2	0		0	3	2	4	0.75	0.5
YCR017C	CWH43	Putative sensor/transporter protein involved in cell wall biogenesis		2	0	1		0	3	2	4	0.75	0.5
YCR106W	RDS1	Regulator of Drug Sensitivity		2	0	1		0	3	2	4	0.75	0.5
YDL013W	HEX3	a role in sumoylation and in genome stability		0	1	2		0	3	2	4	0.75	0.5
YDL023C		dubious		0	2	1		0	3	2	4	0.75	0.5
YDL037C	BSC1	unknown function		0	2	1		0	3	2	4	0.75	0.5
YDL081C	RPP1A, RPLA1	ribosomal protein		1		1	1	0	3	3	4	0.75	0.75
YDL123W		unknown function, localized to vacuolar outer membrane		0		0	3	0	3	1	4	0.75	0.25
YDL146W	LDB17	unknown function		1	2	0		0	3	2	4	0.75	0.5
YDL149W	APG9, AUT9	Transmembrane protein involved in formation of Cvt and autophagic vesicles		1		0	2	0	3	2	4	0.75	0.5
YDL198C	YHM1	Mitochondrial GTP/GDP transporter			2	1	0	0	3	2	4	0.75	0.5
YDR055W	PST1	Cell wall protein that contains a putative GPI-attachment site		2		1	0	0	3	2	4	0.75	0.5
YDR057W	YOS9	ER quality-control lectin		1		2	0	0	3	2	4	0.75	0.5
YDR072C	IPT1, SYR4	involved in synthesis of sphingolipid in cells		2	0	1		0	3	2	4	0.75	0.5
YDR077W	SED1	~role in mitochondrial genome maintenance		2	0	1		0	3	2	4	0.75	0.5
YDR094W		dubious		0	2		1	0	3	2	4	0.75	0.5
YDR096W	GIS1	transcription factor		2	1	0		0	3	2	4	0.75	0.5
YDR127W	ARO1	biosynthesis of chorismate			3	0	0	0	3	1	4	0.75	0.25
YDR191W	HST4	silencing at telomeres		2	0		0	1	3	2	4	0.75	0.5
YDR192C	NUP42	Subunit of the nuclear pore complex		1	2	0		0	3	2	4	0.75	0.5
YDR193W		dubious		1	2	0		0	3	2	4	0.75	0.5
YDR197W	CBS2	Mitochondrial translational activator of the COB mRNA; interacts with translating ribosomes		1	2	0		0	3	2	4	0.75	0.5
YDR202C	RAV2	Subunit of RAVE complex that promotes assembly and reassembly of the V-ATPase		1		2	0	0	3	2	4	0.75	0.5
YDR226W	ADK1	Adenylate kinase, required for purine metabolism		1	2	0		0	3	2	4	0.75	0.5
YDR252W	BTT1	Beta3 subunit which binds ribosomes		3	0	0		0	3	1	4	0.75	0.25
YDR257C	RMS1	Nuclear protein that mediates methyltransferase activity		1	2	0		0	3	2	4	0.75	0.5
YDR265W	PEX10, PAS4	RING finger peroxisomal membrane peroxin		3	0	0		0	3	1	4	0.75	0.25
YDR275W	BSC2	unknown function			0	0	3	0	3	1	4	0.75	0.25
YDR314C	RAD34	involved in nucleotide excision repair		3	0	0		0	3	1	4	0.75	0.25
YDR392W	SPT3	Subunit of the SAGA and SAGA-like transcriptional regulatory complexes		1	2	0		0	3	2	4	0.75	0.5
YDR393W	SHE9	mitochondrial morphology		2	1	0		0	3	2	4	0.75	0.5
YDR428C		uncharacterized, unknown function		0	2	1		0	3	2	4	0.75	0.5
YDR443C	SSN2, SCA1	sb of the RNA polymerase II mediator complex		2	1	0		0	3	2	4	0.75	0.5
YDR463W	STP1, SSY2	Transcription factor		2	1	0		0	3	2	4	0.75	0.5
YDR475C	JIP4	uncharacterized, unknown function		2	0	1		0	3	2	4	0.75	0.5
YDR479C	PEX29	regulation of peroxisome size and number		2	1	0		0	3	2	4	0.75	0.5
YDR481C	PHO8	Repressible alkaline phosphatase, a glycoprotein localized to the vacuole		1	2	0		0	3	2	4	0.75	0.5
YDR501W	PLM2	Protein required for partitioning of the 2-micron plasmid		1	2	0		0	3	2	4	0.75	0.5
YDR507C	GIN4, ERC47	kinase involved in bud growth and assembly of septin ring		1	2	0		0	3	2	4	0.75	0.5
YDR529C	QCR7, UCR7	Sbunit 7 of the ubiquinol cytochrome-c reductase complex		1	2	0		0	3	2	4	0.75	0.5
YDR530C	APA2	Diadenosine 5',5''-P1,P4-tetraphosphate phosphorylase II		0	0	0		3	3	1	4	0.75	0.25
YER027C	GAL83, SPM1	beta-subunits of the Snf1 kinase complex		1	2	0		0	3	2	4	0.75	0.5
YER028C	MIG3	Probable transcriptional repressor		1	0	2		0	3	2	4	0.75	0.5
YER122C	GLO3	ER-Golgi transport		3	0	0		0	3	1	4	0.75	0.25
YER149C	PEA2, DFG9	Coiled-coil polarisome protein required for polarized morphogenesis, cell fusion, and low affinity Ca2+ influx		1	2	0		0	3	2	4	0.75	0.5
YFL054C		uncharacterized, unknown function		1	0	2		0	3	2	4	0.75	0.5
YFR013W	IOC3	nucleosome-stimulated ATPase activity and represses transcription initiation		1	0	2		0	3	2	4	0.75	0.5
YFR015C	GSY1	Glycogen synthase		2	0	1		0	3	2	4	0.75	0.5
YFR025C	HIS2	histidine biosynthesis		2	0	1		0	3	2	4	0.75	0.5
YGL035C	MIG1, TDS22	Transcription factor involved in glucose repression		1	2	0		0	3	2	4	0.75	0.5
YGL041C		dubious		1	2	0		0	3	2	4	0.75	0.5
YGL067W	NPY1	NADH diphosphatase; localizes to peroxisomes		2	1	0		0	3	2	4	0.75	0.5
YGL135W	RPL1B	ribosomal protein		1	2	0		0	3	2	4	0.75	0.5
YGL151W	NUT1	Component of the RNA polymerase II mediator complex		1		2	0	0	3	2	4	0.75	0.5
YGL170C	SPO74	modifying the meiotic outer plaque		1	2	0		0	3	2	4	0.75	0.5
YGL196W		uncharacterized, unknown function		2		0	1	0	3	2	4	0.75	0.5
YGL210W	YPT32	GTPase of the Ypt/Rab family, involved in the exocytic pathway; mediates intra-Golgi traffic or the budding of post-Golgi vesicles		3	0	0		0	3	1	4	0.75	0.25
YGL211W	NCS6	involved in urmylation and in invasive and pseudohyphal growth		3	0	0		0	3	1	4	0.75	0.25
YGL213C	SKI8, REC103	exosome mediated 3' to 5' mRNA degradation and translation inhibition of non-poly(A) mRNAs		2	0	1		0	3	2	4	0.75	0.5
YGL217C		dubious		1	0	2		0	3	2	4	0.75	0.5
YGL218W		dubious		0	2	1		0	3	2	4	0.75	0.5
YGL246C	RAI1	Nuclear protein		1	2	0		0	3	2	4	0.75	0.5
YGR032W	GSC2, FKS2	Glucan Synthase of Cerevisiae		2	0	1		0	3	2	4	0.75	0.5
YGR038W	ORM1	resistance to agents that induce unfolded prot		2	0	1		0	3	2	4	0.75	0.5
YGR050C		dubious		2		1	0	0	3	2	4	0.75	0.5
YGR054W		Eukaryotic initiation factor (eIF) 2A			2	1	0	0	3	2	4	0.75	0.5
YGR061C	ADE6	purine nucleotide biosynthetic pathway		2	0	1		0	3	2	4	0.75	0.5
YGR063C	SPT4	transcription elongation, pre-mRNA procesing		3	0	0		0	3	1	4	0.75	0.25
YGR086C	PIL1	Primary component of eisosomes		2	0	1		0	3	2	4	0.75	0.5
YGR089W	NNF2	uncharacterized, unknown function		2	0	1		0	3	2	4	0.75	0.5
YGR096W	TPC1	Mitochondrial membrane transporter		1	0	2		0	3	2	4	0.75	0.5
YGR106C		uncharacterized, unknown function		2	0	1		0	3	2	4	0.75	0.5
YGR124W	ASN2	Asparagine synthetase		1	2	0		0	3	2	4	0.75	0.5
YGR131W		uncharacterized, unknown function		1	2	0		0	3	2	4	0.75	0.5
YGR134W	CAF130	controlling mRNA initiation, elongation, and degradation		0	2	1		0	3	2	4	0.75	0.5
YGR149W		uncharacterized, unknown function		1	0	2		0	3	2	4	0.75	0.5
YGR214W	RPS0A, NAB1	ribosomal protein		1	2	0		0	3	2	4	0.75	0.5
YGR250C		uncharacterized, unknown function		2	0	1		0	3	2	4	0.75	0.5
YGR261C	APL6	Beta3-like subunit of the yeast AP-3 complex; functions in transport of alkaline phosphatase to the vacuole		2	0	1		0	3	2	4	0.75	0.5
YGR275W	RTT102	Component or chromatin remodeling complexes		2	0	1		0	3	2	4	0.75	0.5
YHL021C	FMP12	uncharacterized, unknown function		0	2	1		0	3	2	4	0.75	0.5
YHL026C		uncharacterized, unknown function		0	2	1		0	3	2	4	0.75	0.5
YHR039C	MSC7	unknown function		0	1	2		0	3	2	4	0.75	0.5
YHR067W				0	2	0		1	3	2	4	0.75	0.5
YHR143W	DSE2	Daughter cell-specific secreted protein with similarity to glucanases		1	2	0		0	3	2	4	0.75	0.5
YHR198C		unkown function		0	0	0		3	3	1	4	0.75	0.25
YHR198C	FMP22	uncharacterized, unknown function		1	0	2		0	3	2	4	0.75	0.5
YIL002C	INP51, SJL1	Phosphatidylinositol 4,5-bisphosphate 5-phosphatase		0	1	2		0	3	2	4	0.75	0.5
YIL029C		uncharacterized, unknown function		2	0	1		0	3	2	4	0.75	0.5
YIL050W	PCL7	Pho85p cyclin of the Pho80p subfamily, forms a functional kinase complex with Pho85p which phosphorylates Mmr1p and is regulated by Pho81p; involved in glycogen metabolism		2	0	1		0	3	2	4	0.75	0.5
YIL055C		uncharacterized, unknown function		2	1		0	0	3	2	4	0.75	0.5
YIL057C		uncharacterized, unknown function		2	0	0		1	3	2	4	0.75	0.5
YIL085C	KTR7	Putative mannosyltransferase		0	2	1		0	3	2	4	0.75	0.5
YIL095W	PRK1	Protein serine/threonine kinase; regulates the organization and function of the actin cytoskeleton		0	2	1		0	3	2	4	0.75	0.5
YIL135C	VHS2	Cytoplasmic protein, unknown function		2	0	0		1	3	2	4	0.75	0.5
YJL139C	YUR1	Mannosyltransferase		1	0	2		0	3	2	4	0.75	0.5
YJL142C	IRC9	dubious	1	1		1	1	0	3	3	4	0.75	0.75
YJL144W		uncharacterized, unknown function		0		1	2	0	3	2	4	0.75	0.5
YJL152W		dubious		0		1	2	0	3	2	4	0.75	0.5
YJL170C	ASG7	regulates signaling from a G protein beta subunit Ste4p		0		2	1	0	3	2	4	0.75	0.5
YJL189W	RPL39	ribosomal protein			0	2	1	0	3	2	4	0.75	0.5
YJL192C				0	2		0	1	3	2	4	0.75	0.5
YJL206C		uncharacterized, unknown function		2	0	1		0	3	2	4	0.75	0.5
YJL213W		uncharacterized, unknown function		2	0	1		0	3	2	4	0.75	0.5
YJR033C	RAV1	Subunit of the RAVE complex, which promotes assembly of the V-ATPase		0	1	2		0	3	2	4	0.75	0.5
YJR048W	CYC1	Cytochrome c		2	0	1		0	3	2	4	0.75	0.5
YJR122W	CAF17	Mitochondrial protein		0	0	3		0	3	1	4	0.75	0.25
YKL073W	LHS1, SSI1	chaperone of the ER, translocation and folding		2	0	0		1	3	2	4	0.75	0.5
YKL096W	CWP1, YJU1	Cell wall mannoprotein		0	2	1		0	3	2	4	0.75	0.5
YKL146W	AVT3	Vacuolar transporter, exports large neutral amino acids from the vacuole		0	2	1		0	3	2	4	0.75	0.5
YKL157W	APE2, LAP1	Zinc-dependent metallopeptidase		1	1		1	0	3	3	4	0.75	0.75
YKL170W	MRPL38, YML38	Mitochondrial ribosomal protein		0	2	1		0	3	2	4	0.75	0.5
YKL200C	MNN4	regulator of mannosylphosphate transferase (Mnn6p)		0	2	1		0	3	2	4	0.75	0.5
YKR023W		uncharacterized, unknown function		2	0	1		0	3	2	4	0.75	0.5
YKR069W	MET1	biosynthesis of siroheme		1	2	0		0	3	2	4	0.75	0.5
YKR090W	PXL1	selection and/or maintenance of polarized growth sites		2	1	0		0	3	2	4	0.75	0.5
YKR104W		Putative transporter of multidrug resistance-associated prot		2	1		0	0	3	2	4	0.75	0.5
YLL053C		uncharacterized, unknown function		0		1	2	0	3	2	4	0.75	0.5
YLL054C		uncharacterized, unknown function		0		1	2	0	3	2	4	0.75	0.5
YLL056C		uncharacterized, unknown function		0		2	1	0	3	2	4	0.75	0.5
YLL057C	JLP1	sulfonate catabolism		0		2	1	0	3	2	4	0.75	0.5
YLR015W	BRE2	methylation of histone		0		2	1	0	3	2	4	0.75	0.5
YLR016C	PML1	nuclear retention of unspliced pre-mRNAs		2		0	1	0	3	2	4	0.75	0.5
YLR054C	OSW2	uncharacterized, unknown function		1	2	0		0	3	2	4	0.75	0.5
YLR056W	ERG3	C-5 sterol desaturase		1	0	2		0	3	2	4	0.75	0.5
YLR207W	HRD3	Resident protein of the ER membrane that plays a central role in ER-associated protein degradation		1	2	0		0	3	2	4	0.75	0.5
YLR282C		dubious		1	2	0		0	3	2	4	0.75	0.5
YLR286C	CTS1			0		2	0	1	3	2	4	0.75	0.5
YLR300W	EXG1, BGL1	involved in cell wall beta-glucan assembly		2	1	0		0	3	2	4	0.75	0.5
YLR318W	EST2	Reverse transcriptase sbunit of the telomerase holoenzyme		0	2	1		0	3	2	4	0.75	0.5
YLR319C	BUD6, AIP3	Actin- and formin-interacting protein, involved in actin cable nucleation and polarized cell growth; isolated as bipolar budding mutant; potential Cdc28p substrate		1	2	0		0	3	2	4	0.75	0.5
YLR328W	NMA1	Nicotinic acid mononucleotide adenylyltransferase, involved in NAD(+) salvage pathway		1	2	0		0	3	2	4	0.75	0.5
YLR337C	VRP1, MDP2	Proline-rich actin-associated protein involved in cytoskeletal organization and cytokinesis		0	2	1		0	3	2	4	0.75	0.5
YLR338W	KRE21	dubious		0	2	1		0	3	2	4	0.75	0.5
YLR369W	SSQ1, SSC2	Mitochondrial hsp70-type molecular chaperone, required for assembly of iron/sulfur clusters into proteins at a step after cluster synthesis		1	2	0		0	3	2	4	0.75	0.5
YLR373C	VID22	fructose-1,6-bisphosphatase (FBPase) degradation; involved in FBPase transport from the cytosol to Vid (vacuole import and degradation) vesicles		1	2	0		0	3	2	4	0.75	0.5
YLR384C	IKI3, ELP1	Subunit of Elongator complex		2	0	1		0	3	2	4	0.75	0.5
YLR410W	VIP1	Inositol hexakisphosphate and inositol heptakisphosphate kinase; generation of IP7 by Vip1p is important for phosphate signaling; likely involved in cortical actin cytoskeleton function		0	0	3		0	3	1	4	0.75	0.25
YLR429W	CRN1	cortical actin cytoskeletal component that associates with the Arp2/3 complex to regulate it		2		0	0	1	3	2	4	0.75	0.5
YLR461W	PAU4	alcoholic fermentation		1	2	0		0	3	2	4	0.75	0.5
YML018C		unknown function			2	0	0	1	3	2	4	0.75	0.5
YML048W	GSF2, ECM6	in glucose-dependent repression		2	0	1		0	3	2	4	0.75	0.5
YML052W	SUR7	Putative integral membrane protein, associated with endocytosis; sporulation and plasma membrane sphingolipid content are altered in mutants		1	2	0		0	3	2	4	0.75	0.5
YML070W	DAK1	stress adaptation			2	1	0	0	3	2	4	0.75	0.5
YML115C	VAN1, VRG7	in mannan synthesis		2	0	1		0	3	2	4	0.75	0.5
YMR015C	ERG5	ergosterol biosynthesis		0		2	1	0	3	2	4	0.75	0.5
YMR042W	ARG80, ARGR1			0		2	0	1	3	2	4	0.75	0.5
YMR118C		uncharacterized, unknown function		1	2	0		0	3	2	4	0.75	0.5
YMR119W	ASI1	Putative integral membrane E3 ubiquitin ligase		1	2	0		0	3	2	4	0.75	0.5
YMR136W	GAT2	Protein containing GATA family zinc finger motifs		0	0	3		0	3	1	4	0.75	0.25
YMR158C-B		uncharacterized, unknown function		1	2	0		0	3	2	4	0.75	0.5
YMR272C	SCS7, FAH1	Sphingolipid alpha-hydroxylase		0		2	1	0	3	2	4	0.75	0.5
YNL011C		uncharacterized, unknown function		3	0	0	0		3	1	4	0.75	0.25
YNL015W	PBI2	Cytosolic inhibitor of vacuolar proteinase B, required for efficient vacuole inheritance; assists in priming SNARE molecules and promotes vacuole fusion		1	2	0		0	3	2	4	0.75	0.5
YNL023C	FAP1	binds to Fpr1p, conferring rapamycin resistance		3	0	0		0	3	1	4	0.75	0.25
YNL045W		Leucyl aminopeptidase		1	2	0		0	3	2	4	0.75	0.5
YNL046W		uncharacterized, unknown function		1	2	0		0	3	2	4	0.75	0.5
YNL069C	RPL16B	ribosomal protein		1	2	0		0	3	2	4	0.75	0.5
YNL078W	NIS1	Protein localized in the bud neck at G2/M phase possibly involved in mitotic signaling		2	1	0		0	3	2	4	0.75	0.5
YNL121C	TOM70, MOM72	Sbunit of translocase of outer membrane (TOM) complex		1	1		1	0	3	3	4	0.75	0.75
YNL134C		uncharacterized, unknown function		1	2	0		0	3	2	4	0.75	0.5
YNL136W	EAF7	Subunit of the NuA4 histone acetyltransferase complex		1	2	0		0	3	2	4	0.75	0.5
YNL141W	AAH1	Adenine deaminase		0	0	0		3	3	1	4	0.75	0.25
YNL219C	ALG9	involved in N-linked glycosylation		1	0	1		1	3	3	4	0.75	0.75
YNL281W	HCH1	Heat shock protein regulator		0	2		1	0	3	2	4	0.75	0.5
YNR002C	FUN34	involved in the export of ammonia		3	0	0		0	3	1	4	0.75	0.25
YNR004W		uncharacterized, unknown function		2	0	1		0	3	2	4	0.75	0.5
YNR031C	SSK2	MAP kinase kinase kinase		1	2	0		0	3	2	4	0.75	0.5
YNR045W	PET494	Mitochondrial translational activator		0	2	1		0	3	2	4	0.75	0.5
YOL001W	PHO80	Cyclin, negatively regulates phosphate metabolism		0	2	1		0	3	2	4	0.75	0.5
YOL036W		uncharacterized, unknown function		0	1	2		0	3	2	4	0.75	0.5
YOL042W	NGL1	Putative endonuclease		0	2	1		0	3	2	4	0.75	0.5
YOL043C	NTG2	base excision repair		0	2	1		0	3	2	4	0.75	0.5
YOL060C	MAM3	required for normal mitochondrial morphology		0	1	2		0	3	2	4	0.75	0.5
YOL076W	MDM20	subunit of the NatB N-terminal acetyltransferase		0	2	1		0	3	2	4	0.75	0.5
YOL084W	PHM7	unknown function on vacuole		1		2	0	0	3	2	4	0.75	0.5
YOR008C-A	KIM1	uncharacterized, unknown function		0	2	1		0	3	2	4	0.75	0.5
YOR123C	LEO1	histone methylation		0		1	2	0	3	2	4	0.75	0.5
YOR131C		uncharacterized, unknown function		2		1	0	0	3	2	4	0.75	0.5
YOR153W	PDR5	Short-lived membrane ABC transporter		1	1	1		0	3	3	4	0.75	0.75
YOR158W	PET123	Mitochondrial ribosomal protein		1	0	2		0	3	2	4	0.75	0.5
YOR175C				0		2	0	1	3	2	4	0.75	0.5
YOR200W		uncharacterized, unknown function		0	1	2	0		3	2	4	0.75	0.5
YOR231W	MKK1	Mitogen-activated kinase kinase		0	1	2		0	3	2	4	0.75	0.5
YOR273C	TPO4	Polyamine transport protein		1	2		0	0	3	2	4	0.75	0.5
YOR279C	RFM1	DNA-binding protein		0		3	0	0	3	1	4	0.75	0.25
YOR284W	HUA2	unknown function		0	1	2		0	3	2	4	0.75	0.5
YOR303W	CPA1	citrulline synthesis		0	1	2	0		3	2	4	0.75	0.5
YOR342C		uncharacterized, unknown function		0	2	1		0	3	2	4	0.75	0.5
YPL092W	SSU1	Plasma membrane sulfite pump		0	2	1		0	3	2	4	0.75	0.5
YPL110C	GDE1	Glycerophosphocholine (GroPCho) phosphodiesterase		0	2	1		0	3	2	4	0.75	0.5
YPL145C	KES1	Member of the oxysterol binding protein family		0	2		1	0	3	2	4	0.75	0.5
YPL152W				0	2		0	1	3	2	4	0.75	0.5
YPL172C	COX10	cytochrome c oxidase activity		0	1		2	0	3	2	4	0.75	0.5
YPL189W	GUP2	Probable membrane protein with a possible role in proton symport of glycerol		0	1		2	0	3	2	4	0.75	0.5
YPL207W	TYW1	Protein required for the synthesis of wybutosine		0	2	1		0	3	2	4	0.75	0.5
YPR046W	MCM16	kinetochore-microtubule mediated chromosom segregation		0	3	0		0	3	1	4	0.75	0.25
YPR060C	ARO7, HGS1	Aromatic amino acid requiring		3	0	0		0	3	1	4	0.75	0.25
YPR074C	TKL1	Transketolase		2	1	0		0	3	2	4	0.75	0.5
YPR087W	VPS69	dubious		0		3	0	0	3	1	4	0.75	0.25
YPR091C		uncharacterized, unknown function		2	0		0	1	3	2	4	0.75	0.5
YPR109W		uncharacterized, unknown function		0	2	1		0	3	2	4	0.75	0.5
YPR193C	HPA2	Tetrameric histone acetyltransferase		2	1	0		0	3	2	4	0.75	0.5
	GSH2				0	2	0	1	3	2	4	0.75	0.5
	PSY2			0	0	0		3	3	1	4	0.75	0.25
	SLZ1			0	0	0		3	3	1	4	0.75	0.25
	SCS1			0	0	0		3	3	1	4	0.75	0.25
YAL014C	SYN8	Endosomal SNARE related to mammalian syntaxin 8		0	0			2	2	1	3	0.666667	0.333333
YAL020C	ATS1, FUN28			0	1			1	2	2	3	0.666667	0.666667
YAL036C	FUN11	GTP-binding protein, DRG family interacts with translating ribosomes		1	1			0	2	2	3	0.666667	0.666667
YAL043C-a	KRE23			1	1			0	2	2	3	0.666667	0.666667
YBL047C	EDE1	endocytic protein involved in a network of interactions			0		0	2	2	1	3	0.666667	0.333333
YBL081W		uncharacterized, unknown function		0	0			2	2	1	3	0.666667	0.333333
YBR059C	AKL1	Ser-Thr protein kinase, involved in endocytosis and actin cytoskeleton organization		2			0	0	2	1	3	0.666667	0.333333
YBR097W	VPS15, VAC4	Myristoylated serine/threonine protein kinase involved in vacuolar protein sorting		2	0	0			2	1	3	0.666667	0.333333
YBR231C				0	1			1	2	2	3	0.666667	0.666667
YCL028W				1	1			0	2	2	3	0.666667	0.666667
YCR060W				1	1			0	2	2	3	0.666667	0.666667
YCR105W				1	0			1	2	2	3	0.666667	0.666667
YDL011C		dubious		0	0			2	2	1	3	0.666667	0.333333
YDL079C	MRK1			1	0			1	2	2	3	0.666667	0.666667
YDL144C				1	0			1	2	2	3	0.666667	0.666667
YDR025W	RPS11A	ribosomal protein		0	0			2	2	1	3	0.666667	0.333333
YDR056C				1		1		0	2	2	3	0.666667	0.666667
YDR174W	HMO1			1	0			1	2	2	3	0.666667	0.666667
YDR184C				1	1			0	2	2	3	0.666667	0.666667
YDR304C	CYP5, CPR5	proline biosynthesis		1	1			0	2	2	3	0.666667	0.666667
YDR310C	SUM1	telomere maintenance		1	1			0	2	2	3	0.666667	0.666667
YDR357C		uncharacterized, unknown function		1	1			0	2	2	3	0.666667	0.666667
YDR417C		dubious		2	0		0		2	1	3	0.666667	0.333333
YEL007W	TOS9				2		0	0	2	1	3	0.666667	0.333333
YER039C-A				1	0			1	2	2	3	0.666667	0.666667
YER044C	ERG28			0	0	2			2	1	3	0.666667	0.333333
YER116C	SLX8	Synthetic Lethal of unknown (X) function		2			0	0	2	1	3	0.666667	0.333333
YER179W	DMC1, ISC2			1	0			1	2	2	3	0.666667	0.666667
YFL023W	FYV11	translation initiation		0	0			2	2	1	3	0.666667	0.333333
YFL034W				1	1			0	2	2	3	0.666667	0.666667
YFL044C	OTU1	regulation of protein degradation		0	0			2	2	1	3	0.666667	0.333333
YFL048C	EMP47			1	1			0	2	2	3	0.666667	0.666667
YFR007W				1	0			1	2	2	3	0.666667	0.666667
YFR010W	UBP6	Ubiquitin-specific protease		0	0			2	2	1	3	0.666667	0.333333
YGL066W				1	0			1	2	2	3	0.666667	0.666667
YGL077C	HNM1			1	0			1	2	2	3	0.666667	0.666667
YGL179C				0			2	0	2	1	3	0.666667	0.333333
YHL016C	DUR3			0	1			1	2	2	3	0.666667	0.666667
YHL022C	SPO11			1	0			1	2	2	3	0.666667	0.666667
YHL027W	RIM101	Transcriptional repressor involved in response to pH		0	0			2	2	1	3	0.666667	0.333333
YHL028W	WSC4, YHC8	ER: translocation of soluble secretory proteins		0	0			2	2	1	3	0.666667	0.333333
YHL045W				0	1			1	2	2	3	0.666667	0.666667
YHR001W-A	QCR10			0	1			1	2	2	3	0.666667	0.666667
YHR030C	SLT2, MPK1	Serine/threonine MAP kinase		0	0			2	2	1	3	0.666667	0.333333
YHR096C				1	1			0	2	2	3	0.666667	0.666667
YHR105W				0	1			1	2	2	3	0.666667	0.666667
YHR117W				1	0			1	2	2	3	0.666667	0.666667
YHR185C	PFS1, ADY1					2	0	0	2	1	3	0.666667	0.333333
YIL007C				1	0			1	2	2	3	0.666667	0.666667
YIL011W	TIR3			1	1			0	2	2	3	0.666667	0.666667
YIL017C	VID28			1	1			0	2	2	3	0.666667	0.666667
YIL024C				1	1			0	2	2	3	0.666667	0.666667
YIL038C	NOT3			1	1			0	2	2	3	0.666667	0.666667
YIL047C	SYG1			1	1			0	2	2	3	0.666667	0.666667
YIL088C				0	0			2	2	1	3	0.666667	0.333333
YIL111W				1	1			0	2	2	3	0.666667	0.666667
YJL053W	PEP8, VPS26	vacuolar protein sorting protein		1	1			0	2	2	3	0.666667	0.666667
YJL055W		uncharacterized, unknown function		0	0			2	2	1	3	0.666667	0.333333
YJL212C	OPT1, HGT1			0	1			1	2	2	3	0.666667	0.666667
YJR021C	REC107, MER2			1	1			0	2	2	3	0.666667	0.666667
YJR031C	GEA1	vesicular transport between the Golgi and ER		0	0			2	2	1	3	0.666667	0.333333
YJR037W				0	1			1	2	2	3	0.666667	0.666667
YJR055W	HIT1	uncharacterized, unknown function		0	0			2	2	1	3	0.666667	0.333333
YJR099W	YUH1					2	0	0	2	1	3	0.666667	0.333333
YJR106W	ECM27			1	1			0	2	2	3	0.666667	0.666667
YKL070W		uncharacterized, unknown function				0	2	0	2	1	3	0.666667	0.333333
YKL110C	KTI12			0	1			1	2	2	3	0.666667	0.666667
YKR094C	RPL40B, UBI2			1	1			0	2	2	3	0.666667	0.666667
YLR020C	YEH1			0	1			1	2	2	3	0.666667	0.666667
YLR021W	IRC25	regulate formation of proteasome isoforms		0	0			2	2	1	3	0.666667	0.333333
YLR047C				1		0		1	2	2	3	0.666667	0.666667
YLR058C				1	0			1	2	2	3	0.666667	0.666667
YLR128W	DCN1	cullin neddylation		2	0	0			2	1	3	0.666667	0.333333
YLR168C	MSF1'			0			2	0	2	1	3	0.666667	0.333333
YLR191W	PEX13, PAS20			1	1			0	2	2	3	0.666667	0.666667
YLR206W	ENT2			1	1			0	2	2	3	0.666667	0.666667
YLR289W	GUF1			1	0			1	2	2	3	0.666667	0.666667
YLR333C	RPS25B	ribosomal protein		0	0			2	2	1	3	0.666667	0.333333
YLR350W				1	0			1	2	2	3	0.666667	0.666667
YLR361C				1	0			1	2	2	3	0.666667	0.666667
YLR382C	NAM2			1	1			0	2	2	3	0.666667	0.666667
YLR394W	CST9, ZIP3			1	0			1	2	2	3	0.666667	0.666667
YLR408C		uncharacterized, unknown function		0	0			2	2	1	3	0.666667	0.333333
YLR433C				1	0			1	2	2	3	0.666667	0.666667
YLR437C				1			0	1	2	2	3	0.666667	0.666667
YLR448W	RPL6B	ribosomal protein		2			0	0	2	1	3	0.666667	0.333333
YML013C-A		dubious		0	1			1	2	2	3	0.666667	0.666667
YML028W	TSA1	Thioredoxin peroxidase		0	0			2	2	1	3	0.666667	0.333333
YML029W	USA1	ligase oligomerization;		0	0			2	2	1	3	0.666667	0.333333
YML034W	SRC1	Inner nuclear membrane protein		0	0			2	2	1	3	0.666667	0.333333
YML037C		uncharacterized, unknown function		0	0			2	2	1	3	0.666667	0.333333
YML081W		uncharacterized, unknown function				0	2	0	2	1	3	0.666667	0.333333
YML082W						0	2	0	2	1	3	0.666667	0.333333
YML117W-A		dubious		0	0			2	2	1	3	0.666667	0.333333
YMR020W	FMS1			0		2		0	2	1	3	0.666667	0.333333
YMR058W	FET3			1			0	1	2	2	3	0.666667	0.666667
YMR135W-A				0	1			1	2	2	3	0.666667	0.666667
YMR201C	RAD14			0	1			1	2	2	3	0.666667	0.666667
YMR275C	BUL1, RDS1					2	0	0	2	1	3	0.666667	0.333333
YNL024C		uncharacterized, unknown function		2	0			0	2	1	3	0.666667	0.333333
YNL068C	FKH2			1	0			1	2	2	3	0.666667	0.666667
YNL080C				0	0			2	2	1	3	0.666667	0.333333
YNL081C				1	1			0	2	2	3	0.666667	0.666667
YNL218W				1	0			1	2	2	3	0.666667	0.666667
YNL329C	PEX6, PAS8			0	1			1	2	2	3	0.666667	0.666667
YNR005C		dubious		0	0			2	2	1	3	0.666667	0.333333
YNR037C	RSM19	Mitochondrial Ribosomal Protein			2	0		0	2	1	3	0.666667	0.333333
YOL013C					1	1		0	2	2	3	0.666667	0.666667
YOL013W-A				0			0	2	2	1	3	0.666667	0.333333
YOL098C				0	1			1	2	2	3	0.666667	0.666667
YOR066W				0	1			1	2	2	3	0.666667	0.666667
YOR073W				1	0			1	2	2	3	0.666667	0.666667
YOR118W				1	0			1	2	2	3	0.666667	0.666667
YOR133W				0	1			1	2	2	3	0.666667	0.666667
YOR240W				1	0			1	2	2	3	0.666667	0.666667
YOR313C				0	1			1	2	2	3	0.666667	0.666667
YOR371C				1	1			0	2	2	3	0.666667	0.666667
YOR382W				0	1			1	2	2	3	0.666667	0.666667
YPL036W	PMA2	Plasma membrane H+-ATPase		0			2	0	2	1	3	0.666667	0.333333
YPL077C				1	0			1	2	2	3	0.666667	0.666667
YPL078C	ATP4, LPF7	Sbunit of stator stalk of mitochondrial F1F0 ATP synthase		0			2	0	2	1	3	0.666667	0.333333
YPL103C				1	1			0	2	2	3	0.666667	0.666667
YPL184C	MRN1	uncharacterized, unknown function			2		0	0	2	1	3	0.666667	0.333333
YPL194W	DDC1			1	0			1	2	2	3	0.666667	0.666667
YPL247C				0	1			1	2	2	3	0.666667	0.666667
YPL259C	APM1, YAP54			1	0			1	2	2	3	0.666667	0.666667
YPL272C				1	1			0	2	2	3	0.666667	0.666667
YPR066W	UBA3			1	1			0	2	2	3	0.666667	0.666667
YPR083W				1	1			0	2	2	3	0.666667	0.666667
YPR095C	SYT1			1	1			0	2	2	3	0.666667	0.666667
YPR154W				1	0			1	2	2	3	0.666667	0.666667
YPR170C				1	0			1	2	2	3	0.666667	0.666667
	RPS10A	ribosomal protein		0	0			2	2	1	3	0.666667	0.333333
	STD1			0	0			2	2	1	3	0.666667	0.333333
	GLN3			0	0			2	2	1	3	0.666667	0.333333
	DMA1			0	0			2	2	1	3	0.666667	0.333333
	PMS1			0	0			2	2	1	3	0.666667	0.333333
	TRM10			0	0			2	2	1	3	0.666667	0.333333
	APT1			0	0			2	2	1	3	0.666667	0.333333
	HMG1			0	0			2	2	1	3	0.666667	0.333333
	BUD24			0	0			2	2	1	3	0.666667	0.333333
YBR150C	TBS1	unknown function		0	2	0	1	0	3	2	5	0.6	0.4
YBR228W	SLX1	hydrolyzes 5' branches from duplex DNA in response to stalled or converging replication forks		1	0	2	0	0	3	2	5	0.6	0.4
YCL058C	FYV5			0	0	1	2	0	3	2	5	0.6	0.4
YDL174C	DLD1	D-lactate dehydrogenase		2	0	0	1	0	3	2	5	0.6	0.4
YDR070C	FMP16	unknown function		3	0	0	0	0	3	1	5	0.6	0.2
YDR084C	TVP23	Integral membrane protein localized to late Golgi vesicles along with the v-SNARE Tlg2p		2	0	0	1	0	3	2	5	0.6	0.4
YDR135C	YCF1	Vacuolar glutathione S-conjugate transporter of the ATP-binding cassette family		0	2	0	1	0	3	2	5	0.6	0.4
YDR175C	RSM24	Mitochondrial ribosomal protein		2	0	0	1	0	3	2	5	0.6	0.4
YDR218C	SPR28	meiotic septin		0	2	0	1	0	3	2	5	0.6	0.4
YDR340W		dubious		0	0	0	3	0	3	1	5	0.6	0.2
YDR369C	XRS2	DNA repair		0	0	0	3	0	3	1	5	0.6	0.2
YDR484W	SAC2, VPS52	Component of the Golgi-associated retrograde protein complex, Vps51p-Vps52p-Vps53p-Vps54p, which is required for the recycling of proteins from endosomes to the late Golgi; involved in localization of actin and chitin		0	3	0	0	0	3	1	5	0.6	0.2
YDR512C	EMI1	unknown function		2	0	0	1	0	3	2	5	0.6	0.4
YEL015W	EDC3	unknown function		1	2	0	0	0	3	2	5	0.6	0.4
YEL016C	NPP2	mediates extracellular nucleotide phosphate hydrolysis		1	2	0	0	0	3	2	5	0.6	0.4
YEL036C	ANP1, MNN8	Subunit of the alpha-1,6 mannosyltransferase complex		0	0	2	1	0	3	2	5	0.6	0.4
YEL048C		uncharacterized, unknown function		0	0	2	1	0	3	2	5	0.6	0.4
YER033C	ZRG8	unknown function		0	0	2	1	0	3	2	5	0.6	0.4
YGL006W	PMC1	Vacuolar Ca2+ ATPase involved in depleting cytosol of Ca2+ ions		0	3	0	0	0	3	1	5	0.6	0.2
YGL015C		uncharacterized, unknown function		0	2	0	1	0	3	2	5	0.6	0.4
YGL157W		Oxidoreductase		2	0	0	1	0	3	2	5	0.6	0.4
YGL167C	PMR1	High affinity Ca2+/Mn2+ P-type ATPase required for Ca2+ and Mn2+ transport into Golgi		0	3	0	0	0	3	1	5	0.6	0.2
YGL208W	SIP2, SPM2	response to glucose starvation		2	0	0	1	0	3	2	5	0.6	0.4
YGL263W	COS12	unknown function		1	0	0	2	0	3	2	5	0.6	0.4
YGR217W	CCH1	Voltage-gated high-affinity calcium channel		0	2	0	1	0	3	2	5	0.6	0.4
YGR235C		uncharacterized, unknown function		0	0	2	1	0	3	2	5	0.6	0.4
YHL003C	LAG1	Ceramide synthase component		0	2	0	1	0	3	2	5	0.6	0.4
YHL047C	TAF1	ARN family of transporters		0	1	0	0	2	3	2	5	0.6	0.4
YHR014W	SPO13			0	0	2	0	1	3	2	5	0.6	0.4
YHR033W		uncharacterized, unknown function		0	1	2	0	0	3	2	5	0.6	0.4
YHR154W	RTT107	regulation of Ty1 transposition		2	0	0	0	1	3	2	5	0.6	0.4
YHR179W	OYE2	Widely conserved NADPH oxidoreductase		0	0	2	1	0	3	2	5	0.6	0.4
YHR209W	CRG1	uncharacterized, unknown function		0	0	2	1	0	3	2	5	0.6	0.4
YIL005W	EPS1	ER retention of resident ER proteins		2	0	0	0	1	3	2	5	0.6	0.4
YIL012W		dubious		0	2	1	0	0	3	2	5	0.6	0.4
YIL065C	FIS1, MDV2	Mitochondrial outer membrane protein involved in membrane fission		0	2	0	1	0	3	2	5	0.6	0.4
YIL121W	QDR2	Multidrug transporter		3	0	0	0	0	3	1	5	0.6	0.2
YIL141W		dubious		2	0	0	1	0	3	2	5	0.6	0.4
YIL162W	SUC2	Sucrose fermentation		2	0	0	0	1	3	2	5	0.6	0.4
YIL164C	NIT1	nitrilase		2	0	1	0	0	3	2	5	0.6	0.4
YJL006C	CTK2			0	0	1	2	0	3	2	5	0.6	0.4
YJL044C	GYP6	GTPase-activating protein (GAP) for the Rab family member, Ypt6p; involved in vesicle mediated protein transport		0	2	1	0	0	3	2	5	0.6	0.4
YJL190C	RPS22A, RPS24	ribosomal protein		0	2	1	0	0	3	2	5	0.6	0.4
YJL204C	RCY1	F-box protein involved in recycling plasma membrane prot internalized by endocytosis		0	2	0	1	0	3	2	5	0.6	0.4
YJR083C	ACF4	possible role in actin cytoskeleton organization		0	0	2	1	0	3	2	5	0.6	0.4
YJR124C				0	0	2	1	0	3	2	5	0.6	0.4
YKL075C		uncharacterized, unknown function		1	0	0	2	0	3	2	5	0.6	0.4
YKR001C	VPS1	dynamin-like GTPase		0	1	0	2	0	3	2	5	0.6	0.4
YLR019W	PSR2	MP phosphatase, general stress		2	0	0	1	0	3	2	5	0.6	0.4
YLR057W		uncharacterized, unknown function		1	0	0	2	0	3	2	5	0.6	0.4
YLR104W		uncharacterized, unknown function		1	0	0	2	0	3	2	5	0.6	0.4
YLR173W		uncharacterized, unknown function		1	0	0	2	0	3	2	5	0.6	0.4
YLR203C	MSS51	for translation of COX1 mRNA		0	1	0	2	0	3	2	5	0.6	0.4
YLR308W	CDA2	Chitin deacetylase		0	0	3	0	0	3	1	5	0.6	0.2
YLR432W	IMD3	GMP biosynthesis		3	0	0	0	0	3	1	5	0.6	0.2
YLR449W	FPR4	isomerization of proline residues in histones		2	0	1	0	0	3	2	5	0.6	0.4
YLR450W	HMG2	sterol biosynthesis		3	0	0	0	0	3	1	5	0.6	0.2
YML079W		uncharacterized, unknown function		0	0	0	3	0	3	1	5	0.6	0.2
YMR068W	AVO2			0	2	0	0	1	3	2	5	0.6	0.4
YMR138W	CIN4, UGX1			0	0	2	0	1	3	2	5	0.6	0.4
YMR194W	RPL36A, RPL39B	ribosomal protein		0	2	1	0	0	3	2	5	0.6	0.4
YMR297W	PRC1, LBC1	Vacuolar carboxypeptidase Y		0	2	1	0	0	3	2	5	0.6	0.4
YNL071W	LAT1, PDA2			1	0	0	0	2	3	2	5	0.6	0.4
YNL220W	ADE12, BRA9	synthesis of adenosine monophosphate		3	0	0	0	0	3	1	5	0.6	0.2
YNL254C				0	2	0	0	1	3	2	5	0.6	0.4
YNL269W	BSC4	unknown function		0	2	0	1	0	3	2	5	0.6	0.4
YNL297C	MON2	Peripheral membrane protein with a role in endocytosis and vacuole integrity		0	0	2	1	0	3	2	5	0.6	0.4
YNL319W		dubious		0	3	0	0	0	3	1	5	0.6	0.2
YOL035C		dubious		0	2	0	1	0	3	2	5	0.6	0.4
YOL053C-A	DDR2	Multistress response protein		1	0	0	2	0	3	2	5	0.6	0.4
YOL054W	PSH1	putative RNA polymerase II elongation factor		0	0	1	2	0	3	2	5	0.6	0.4
YOR022C		uncharacterized, unknown function		2	0	1	0	0	3	2	5	0.6	0.4
YOR033C	EXO1	exonuclease and flap-endonuclease		3	0	0	0	0	3	1	5	0.6	0.2
YOR065W	CYT1	Cytochrome c1		0	2	1	0	0	3	2	5	0.6	0.4
YOR071C	THI71	uncharacterized, unknown function		0	2	1	0	0	3	2	5	0.6	0.4
YOR108W	LEU9	leucine biosynthesis		2	1	0	0	0	3	2	5	0.6	0.4
YOR114W				0	2	0	0	1	3	2	5	0.6	0.4
YOR115C	TRS33	subunits of the transport protein particle (TRAPP) complex of the cis-Golgi which mediates vesicle docking and fusion; involved in ER to Golgi traffic		0	2	1	0	0	3	2	5	0.6	0.4
YOR130C	ORT1			0	0	1	0	2	3	2	5	0.6	0.4
YOR150W	MRPL23	Mitochondrial Ribosomal Protein		0	2	1	0	0	3	2	5	0.6	0.4
YOR172W	YRM1	multidrug resistance		1	0	0	2	0	3	2	5	0.6	0.4
YOR182C				0	0	2	0	1	3	2	5	0.6	0.4
YOR183W				0	0	2	0	1	3	2	5	0.6	0.4
YOR196C	LIP5	biosynthesis of the coenzyme lipoic acid		0	1	2	0	0	3	2	5	0.6	0.4
YOR201C	MRM1	ribose methyltransferase		0	0	2	1	0	3	2	5	0.6	0.4
YOR214C				0	2	0	0	1	3	2	5	0.6	0.4
YOR219C				0	2	0	0	1	3	2	5	0.6	0.4
YOR223W		uncharacterized, unknown function		0	2	0	1	0	3	2	5	0.6	0.4
YOR227W				0	2	0	0	1	3	2	5	0.6	0.4
YOR230W	WTM1	Transcriptional repressor involved in regulation of meiosis and silencing		0	0	1	0	2	3	2	5	0.6	0.4
YOR258W				0	0	1	0	2	3	2	5	0.6	0.4
YOR301W	RAX1	bud site selection during bipolar budding		0	0	1	0	2	3	2	5	0.6	0.4
YOR321W				0	0	2	0	1	3	2	5	0.6	0.4
YOR324C	FRT1	ER prot, substrate of the phosphatase calcineurin		1	2	0	0	0	3	2	5	0.6	0.4
YOR328W	PRD10	pleiotropic drug resistance		0	2	1	0	0	3	2	5	0.6	0.4
YOR331C		dubious		0	2	1	0	0	3	2	5	0.6	0.4
YOR332W	VMA4	Subunit E of the V-ATPase (V1)		0	2	0	1	0	3	2	5	0.6	0.4
YOR337W	TEA1	Ty1 enhancer activator		0	1	2	0	0	3	2	5	0.6	0.4
YOR339C	UBC11	Ubiquitin-conjugating enzyme		0	2	1	0	0	3	2	5	0.6	0.4
YPL099C	FMP14	uncharacterized, unknown function		0	2	1	0	0	3	2	5	0.6	0.4
YPL161C	BEM4	Protein involved in establishment of cell polarity and bud emergence; interacts with the Rho1p small GTP-binding protein and with the Rho-type GTPase Cdc42p		0	2	1	0	0	3	2	5	0.6	0.4
YPL170W	DAP1	Heme-binding prot, regulation of cytochrome		0	2	0	1	0	3	2	5	0.6	0.4
YPL196W	OXR1	unknown function		0	0	0	1	2	3	2	5	0.6	0.4
YPL197C		dubious		2	0	1	0	0	3	2	5	0.6	0.4
YPL198W	RPL7B	ribosomal protein		0	1	0	0	2	3	2	5	0.6	0.4
YPL230W	USV1			0	2	0	0	1	3	2	5	0.6	0.4
YAL012W	CYS3, FUN35			1	0				1	1	2	0.5	0.5
YAL060W				0		2	0	0	2	1	4	0.5	0.25
YBL038W	MRPL16	Mitochondrial ribosomal protein		0	0	2		0	2	1	4	0.5	0.25
YBR030W				0		0	2	0	2	1	4	0.5	0.25
YBR036C	CSG2, CLS2			0		0	2	0	2	1	4	0.5	0.25
YBR048W	RPS11B	ribosomal protein		2	0	0		0	2	1	4	0.5	0.25
YBR052C	RFS1	uncharacterized, unknown function		2	0	0		0	2	1	4	0.5	0.25
YBR084W	MIS1			1		0	1	0	2	2	4	0.5	0.5
YBR090C				0	2		0	0	2	1	4	0.5	0.25
YBR093C	PHO5	phosphate hydrolysis		0	0		0	2	2	1	4	0.5	0.25
YBR116C		dubious		2	0	0		0	2	1	4	0.5	0.25
YBR133C	HSL7						1	0	1	1	2	0.5	0.5
YBR139W		Putative serine type carboxypeptidase		2	0	0		0	2	1	4	0.5	0.25
YBR147W	RTC2	unknown function		0	0		0	2	2	1	4	0.5	0.25
YBR171W	SEC66, SEC71	Non-essential subunit of Sec63 complex		2	0		0	0	2	1	4	0.5	0.25
YBR179C				0	2	0		0	2	1	4	0.5	0.25
YBR191W	RPL21A, URP1	ribosomal protein		0	0	2		0	2	1	4	0.5	0.25
YBR229C	ROT2	Glucosidase II catalytic subunit required for normal cell wall synthesis; mutations in tor2 suppress tor2 mutations		2	0	0		0	2	1	4	0.5	0.25
YBR245C				0	2	0		0	2	1	4	0.5	0.25
YBR274W				0	0	2		0	2	1	4	0.5	0.25
YBR285W				0	0	2		0	2	1	4	0.5	0.25
YBR300C				0	0	2		0	2	1	4	0.5	0.25
YCL012W	merged with BUD3	in bud-site selection and required for axial		2	0	0		0	2	1	4	0.5	0.25
YCL042W		uncharacterized, unknown function		2	0	0		0	2	1	4	0.5	0.25
YCR002C	CDC10	Component of the septin ring of the mother-bud neck that is required for cytokinesis		0	0	2		0	2	1	4	0.5	0.25
YCR025C				0	2	0		0	2	1	4	0.5	0.25
YCR031C				0	2	0		0	2	1	4	0.5	0.25
YCR032W	BPH1			0	2		0	0	2	1	4	0.5	0.25
YCR036W	RBK1	Putative ribokinase		0	2	0		0	2	1	4	0.5	0.25
YCR081W				0		0	2	0	2	1	4	0.5	0.25
YCR083W	TRX3			0	0		2	0	2	1	4	0.5	0.25
YDL095W	PMT1	Protein O-mannosyltransferase		0	0		0	2	2	1	4	0.5	0.25
YDL106C	PHO2, GRF10				1			0	1	1	2	0.5	0.5
YDL118W		uncharacterized, unknown function		0	0	0		2	2	1	4	0.5	0.25
YDL127W	PCL2, CLN4				1			0	1	1	2	0.5	0.5
YDL182W	LYS20			1	0				1	1	2	0.5	0.5
YDL202W	MRPL11	Mitochondrial ribosomal protein		0	0	2		0	2	1	4	0.5	0.25
YDL204W					1			0	1	1	2	0.5	0.5
YDR051C		uncharacterized, unknown function		2		0	0	0	2	1	4	0.5	0.25
YDR059C	UBC5	Ubiquitin-conjugating enzyme that mediates selective degradation		0		2	0	0	2	1	4	0.5	0.25
YDR065W		uncharacterized, unknown function		2		0	0	0	2	1	4	0.5	0.25
YDR067C				1	0	1		0	2	2	4	0.5	0.5
YDR123C	INO2, SCS1	transcription activator		1	0	0	1		2	2	4	0.5	0.5
YDR200C				1		1	0	0	2	2	4	0.5	0.5
YDR254W	CHL4, MCM17	chromosome stability		2	0	0		0	2	1	4	0.5	0.25
YDR261C	EXG2	involved in cell wall beta-glucan assembly		2	0	0		0	2	1	4	0.5	0.25
YDR262W		uncharacterized, unknown function		2	0	0		0	2	1	4	0.5	0.25
YDR270W	CCC2	Cu(+2)-transporting P-type ATPase		1	1		0	0	2	2	4	0.5	0.5
YDR485C	VPS72	exchanges histone variant		2	0	0	0		2	1	4	0.5	0.25
YDR490C	PKH1	sphingolipid-mediated signaling pathway that controls endocytosis		2	0		0	0	2	1	4	0.5	0.25
YDR491C		dubious		2	0	0		0	2	1	4	0.5	0.25
YEL005C	VAB2, VAB31			0	1				1	1	2	0.5	0.5
YEL049W	PAU2	encoded mainly in subtelomeric regions			0	2	0	0	2	1	4	0.5	0.25
YEL071W	DLD3			0				1	1	1	2	0.5	0.5
YER001W	MNN1	Alpha-1,3-mannosyltransferase		2	0	0		0	2	1	4	0.5	0.25
YER030W	CHZ1	Histone chaperone			0	2	0	0	2	1	4	0.5	0.25
YER048C	CAJ1				0	2	0	0	2	1	4	0.5	0.25
YER052C	HOM3, SIL4				0	2	0	0	2	1	4	0.5	0.25
YER088C	DOT6				2	0	0	0	2	1	4	0.5	0.25
YER113C				1	1		0	0	2	2	4	0.5	0.5
YER115C	SPR6			1	1		0	0	2	2	4	0.5	0.5
YER117W	RPL23B			1	1		0	0	2	2	4	0.5	0.5
YER139C				0	1				1	1	2	0.5	0.5
YER144C				1	0				1	1	2	0.5	0.5
YFL013C	IES1			1	1		0	0	2	2	4	0.5	0.5
YFL027C	GYP8	regulation of ER to Golgi vesicle transport		0	0		0	2	2	1	4	0.5	0.25
YFR001W	LOC1					1		0	1	1	2	0.5	0.5
YFR032C				1	0				1	1	2	0.5	0.5
YFR036W	CDC26	Cell Division Cycle		2	0	0	0		2	1	4	0.5	0.25
YFR038W				1	0				1	1	2	0.5	0.5
YFR040W				1	0				1	1	2	0.5	0.5
YFR048W				1	0				1	1	2	0.5	0.5
YGL005C	COG7	protein trafficking to mediate fusion of transport vesicles to Golgi compartments		0	2	0		0	2	1	4	0.5	0.25
YGL031C	RPL24A, RPL30A	ribosomal protein		2	0		0	0	2	1	4	0.5	0.25
YGL034C				0	2		0	0	2	1	4	0.5	0.25
YGL059W				1	0				1	1	2	0.5	0.5
YGL081W		uncharacterized, unknown function		2		0	0	0	2	1	4	0.5	0.25
YGL082W				1	1		0	0	2	2	4	0.5	0.5
YGL107C				1	1		0	0	2	2	4	0.5	0.5
YGL127C				1	1		0	0	2	2	4	0.5	0.5
YGL136C				0		2	0	0	2	1	4	0.5	0.25
YGL165C				0		1			1	1	2	0.5	0.5
YGL175C				0		2	0	0	2	1	4	0.5	0.25
YGL177W				0	2		0	0	2	1	4	0.5	0.25
YGL180W	ATG1	autophagy and for the cytoplasm-to-vacuole targeting (Cvt) pathway		2		0	0	0	2	1	4	0.5	0.25
YGL195W	GCN1			1		0	1	0	2	2	4	0.5	0.5
YGL197W	MDS3	negative regulator of meiotic gene expression		2		0	0	0	2	1	4	0.5	0.25
YGL200C	EMP24	Integral membrane component of ER-derived COPII-coated vesicles		2		0	0	0	2	1	4	0.5	0.25
YGL218W				0	2	0	0		2	1	4	0.5	0.25
YGL223C	COG1	protein trafficking to mediate fusion of transport vesicles to Golgi compartments		2	0	0	0		2	1	4	0.5	0.25
YGR040W	KSS1	MAP kinase		2	0	0		0	2	1	4	0.5	0.25
YGR053C		uncharacterized, unknown function		2	0	0		0	2	1	4	0.5	0.25
YGR109C	CLB6				2	0	0	0	2	1	4	0.5	0.25
YGR110W		uncharacterized, unknown function		2	0	0		0	2	1	4	0.5	0.25
YGR125W		uncharacterized, unknown function		0	2	0		0	2	1	4	0.5	0.25
YGR138C				1	0				1	1	2	0.5	0.5
YGR157W	CHO2, PEM1			1	0				1	1	2	0.5	0.5
YGR169C				1	0				1	1	2	0.5	0.5
YGR189C	CRH1			1	0				1	1	2	0.5	0.5
YGR203W				1	0				1	1	2	0.5	0.5
YGR225W				1	0				1	1	2	0.5	0.5
YGR290W				1		0			1	1	2	0.5	0.5
YHL007C	STE20	pheromone response, activated by Cdc42p		2	0	0		0	2	1	4	0.5	0.25
YHL024W	RIM4, NOS1			0	1				1	1	2	0.5	0.5
YHL025W	SNF6				1			0	1	1	2	0.5	0.5
YHR004C	NEM1			0		2	0	0	2	1	4	0.5	0.25
YHR017W	YSC83			0	2	0	0		2	1	4	0.5	0.25
YHR131C				0	0	2		0	2	1	4	0.5	0.25
YHR160C	PEX18	peroxisomal targeting of the Pex7p peroxisomal signal recognition factor and peroxisomal matrix		1	1	0		0	2	2	4	0.5	0.5
YHR168W				1	0				1	1	2	0.5	0.5
YHR203C	RPS4B	ribosomal protein		0	0	0		2	2	1	4	0.5	0.25
YIL018W	RPL2B, RPL5A	ribosomal protein		2	0	0		0	2	1	4	0.5	0.25
YIL090W				0	+			1	1	1	2	0.5	0.5
YIL107C				0	1	1		0	2	2	4	0.5	0.5
YIL128W				0		2	0	0	2	1	4	0.5	0.25
YIL136W	OM45	mitochondrial membrane prot, unknown function		2	0	0		0	2	1	4	0.5	0.25
YIL158W				0	1				1	1	2	0.5	0.5
YJL030W	MAD2			1	0				1	1	2	0.5	0.5
YJL075C				0			1		1	1	2	0.5	0.5
YJL078C	PRY3			0	2		0	0	2	1	4	0.5	0.25
YJL093C	TOK1, DUK1				2	0	0	0	2	1	4	0.5	0.25
YJL120W		dubious	2	0	0	2		0	2	1	4	0.5	0.25
YJL151C				0		2	0	0	2	1	4	0.5	0.25
YJL163C		uncharacterized, unknown function		0	0	2		0	2	1	4	0.5	0.25
YJL191W	RPS14B, CRY2			0	2		0	0	2	1	4	0.5	0.25
YJR003C				0	2		0	0	2	1	4	0.5	0.25
YJR011C		uncharacterized, unknown function		0	0		0	2	2	1	4	0.5	0.25
YJR053W	BFA1	cell cycle checkpoint pathways		2	0		0	0	2	1	4	0.5	0.25
YJR087W		dubious		0	0	2		0	2	1	4	0.5	0.25
YJR104C	SOD1, CRS4	Cytosolic superoxide dismutase		0	0	2		0	2	1	4	0.5	0.25
YKL008C	LAC1			0	2	0		0	2	1	4	0.5	0.25
YKL046C				0	2	0		0	2	1	4	0.5	0.25
YKL118W				1	0				1	1	2	0.5	0.5
YKL139W	CTK1	transcription and pre-mRNA 3' end processing		2	0	0		0	2	1	4	0.5	0.25
YKL150W	MCR1	ergosterol biosynthesis		0	0		0	2	2	1	4	0.5	0.25
YKL215C		uncharacterized, unknown function		2	0	0		0	2	1	4	0.5	0.25
YKR019C	IRS4	regulation of phosphatidylinositol 4,5-bisP		1	0	1		0	2	2	4	0.5	0.5
YKR040C		dubious		2	0		0	0	2	1	4	0.5	0.25
YKR048C	NAP1				0	0	2	0	2	1	4	0.5	0.25
YKR065C				0	1				1	1	2	0.5	0.5
YKR066C	CCP1	Mitochondrial cytochrome-c peroxidase		0		2	0	0	2	1	4	0.5	0.25
YKR097W				1	1		0	0	2	2	4	0.5	0.5
YLL018C-A				1	1		0	0	2	2	4	0.5	0.5
YLL060C	GTT2	Glutathione S-transferase		0		1	1	0	2	2	4	0.5	0.5
YLR004C				0		2	0	0	2	1	4	0.5	0.25
YLR035C	MLH2			0	0		2	0	2	1	4	0.5	0.25
YLR040C				0	1				1	1	2	0.5	0.5
YLR043C				0	2	0		0	2	1	4	0.5	0.25
YLR080W				1				0	1	1	2	0.5	0.5
YLR093C	NYV1			1				0	1	1	2	0.5	0.5
YLR102C	APC9	cell cycle		2	0	0		0	2	1	4	0.5	0.25
YLR111W		dubious		0		0	2	0	2	1	4	0.5	0.25
YLR135W	SLX4	Subunit of a complex, with Slx1p, that hydrolyzes 5' branches from duplex DNA		1	0	0		1	2	2	4	0.5	0.5
YLR136C	TIS11, CTH2			1		0			1	1	2	0.5	0.5
YLR164W		Mitochondrial inner membrane of unknown function			0	0	2	0	2	1	4	0.5	0.25
YLR193C				1	0				1	1	2	0.5	0.5
YLR194C		uncharacterized, unknown function		2	0	0		0	2	1	4	0.5	0.25
YLR211C				1				0	1	1	2	0.5	0.5
YLR242C	ARV1	intracellular sterol distribution and sphingolipid metabolism		1	1	0		0	2	2	4	0.5	0.5
YLR247C				0		2	0	0	2	1	4	0.5	0.25
YLR250W	SSP120	unknown function		0	0	2		0	2	1	4	0.5	0.25
YLR251W	SYM1	ethanol metabolism		2	0	0	0		2	1	4	0.5	0.25
YLR261C				0	1				1	1	2	0.5	0.5
YLR285W	NNT1	rDNA silencing		2	0	0		0	2	1	4	0.5	0.25
YLR294C				1	1		0	0	2	2	4	0.5	0.5
YLR322W				1				0	1	1	2	0.5	0.5
YLR421C	RPN13				0			1	1	1	2	0.5	0.5
YLR431C	ATG23	autophagy and cytoplasm-to-vacuole targeting		2		0	0	0	2	1	4	0.5	0.25
YLR434C				1	1		0	0	2	2	4	0.5	0.5
YLR460C		uncharacterized, unknown function		2		0	0	0	2	1	4	0.5	0.25
YML020W					0	0	2	0	2	1	4	0.5	0.25
YML038C	YMD8			0	2	0		0	2	1	4	0.5	0.25
YML042W	CAT2	Carnitine acetyl-CoA transferase		0	0	0		2	2	1	4	0.5	0.25
YML072C				0		2	0	0	2	1	4	0.5	0.25
YML086C	ALO1					0		1	1	1	2	0.5	0.5
YML128C	MSC1			1	0				1	1	2	0.5	0.5
YMR018W		unknown function; similarity to human PEX5Rp		0		1	1	0	2	2	4	0.5	0.5
YMR038C	LYS7	oxidative stress protection		0	2	0		0	2	1	4	0.5	0.25
YMR067C				1		1	0	0	2	2	4	0.5	0.5
YMR121C	RPL15B	ribosomal protein		0		0	2	0	2	1	4	0.5	0.25
YMR158W-A				0	1				1	1	2	0.5	0.5
YMR182C	RGM1			0	0	2		0	2	1	4	0.5	0.25
YMR190C	SGS1			0	0	1		1	2	2	4	0.5	0.5
YMR204C				0	2		0	0	2	1	4	0.5	0.25
YMR209C				1	0				1	1	2	0.5	0.5
YMR258C				0		1	1	0	2	2	4	0.5	0.5
YMR259C				0		1	1	0	2	2	4	0.5	0.5
YMR273C	ZDS1, NRC1			0		2	0	0	2	1	4	0.5	0.25
YMR274C	RCE1			0		2	0	0	2	1	4	0.5	0.25
YMR284W	YKU70, HDF1			0		1	0	1	2	2	4	0.5	0.5
YMR287C	MSU1, DSS1			0		0	2	0	2	1	4	0.5	0.25
YMR289W				0		0	2	0	2	1	4	0.5	0.25
YMR311C	GLC8			0	1	1	0		2	2	4	0.5	0.5
YMR322C				0	2		0	0	2	1	4	0.5	0.25
YNL014W	HEF3	Translational elongation factor EF-3		2	0	0	0		2	1	4	0.5	0.25
YNL050C				1	0				1	1	2	0.5	0.5
YNL063W				1	0				1	1	2	0.5	0.5
YNL069C	RPL16B, RP23	ribosomal protein		1	0	0		1	2	2	4	0.5	0.5
YNL074C	MLF3, YMK1			0		1			1	1	2	0.5	0.5
YNL079C	TPM1						0	1	1	1	2	0.5	0.5
YNL084C	END3				1			0	1	1	2	0.5	0.5
YNL092W					0	0	2	0	2	1	4	0.5	0.25
YNL094W					0	0	2	0	2	1	4	0.5	0.25
YNL133C				0	1				1	1	2	0.5	0.5
YNL147W	LSM7	Lsm (Like Sm) protein		2	0		0	0	2	1	4	0.5	0.25
YNL176C				0	2		0	0	2	1	4	0.5	0.25
YNL204C	SPS18, SPX18			0	2		0	0	2	1	4	0.5	0.25
YNL208W		unknown function		0	1	1		0	2	2	4	0.5	0.5
YNL265C	IST1			0	1				1	1	2	0.5	0.5
YNL268W	LYP1	Lysine permease		2	0		0	0	2	1	4	0.5	0.25
YNL277W	MET2			0	2		0	0	2	1	4	0.5	0.25
YNL278W	CAF120			0	2		0	0	2	1	4	0.5	0.25
YNR013C	PHO91	Low-affinity phosphate transporter		2	0	0		0	2	1	4	0.5	0.25
YNR024W				0	0	2	0		2	1	4	0.5	0.25
YNR025C		dubious		2	0	0		0	2	1	4	0.5	0.25
YNR047W				0	0		2	0	2	1	4	0.5	0.25
YNR074C				0		0	0	2	2	1	4	0.5	0.25
YOL016C	CMK2				2	0	0	0	2	1	4	0.5	0.25
YOL039W				0	1	1		0	2	2	4	0.5	0.5
YOL045W	PSK2	sugar flux and translation		2	0	0		0	2	1	4	0.5	0.25
YOL055C	THI20	thiamine biosynthesis and degradation		2	0	0		0	2	1	4	0.5	0.25
YOL087C				0	1				1	1	2	0.5	0.5
YOL115W	TRF4, PAP2	RNA quality control		2	0	0	0		2	1	4	0.5	0.25
YOL121C	RPS19A	ribosomal protein		0		2	0	0	2	1	4	0.5	0.25
YOL141W	PPM2			0	2		0	0	2	1	4	0.5	0.25
YOL147C	PEX11, PMP27	peroxisome proliferation		2	0		0	0	2	1	4	0.5	0.25
YOL162W				0		2	0	0	2	1	4	0.5	0.25
YOR013W				0		2	0	0	2	1	4	0.5	0.25
YOR040W	GLO4	mitochondrial glyoxalase II		0	0		1	1	2	2	4	0.5	0.5
YOR061W	CKA2	kinase invovled in cell growth and proliferation		0	2	0		0	2	1	4	0.5	0.25
YOR091W				1		1	0	0	2	2	4	0.5	0.5
YOR094W				0		1	0	1	2	2	4	0.5	0.5
YOR097C				0		2	0	0	2	1	4	0.5	0.25
YOR101W	RAS1	GTPase, plays a role in cell proliferation		1		1	0	0	2	2	4	0.5	0.5
YOR104W				0		2	0	0	2	1	4	0.5	0.25
YOR129C				1		1	0	0	2	2	4	0.5	0.5
YOR132W	VPS17	endosome-to-Golgi retrograde protein transport		0	1	1		0	2	2	4	0.5	0.5
YOR136W				0	1		0	1	2	2	4	0.5	0.5
YOR154W					0	2	0	0	2	1	4	0.5	0.25
YOR155C					0	2	0	0	2	1	4	0.5	0.25
YOR162C				0		2	0	0	2	1	4	0.5	0.25
YOR163W					0	2	0	0	2	1	4	0.5	0.25
YOR197W	MCA1	Putative cysteine protease		0		0	1	1	2	2	4	0.5	0.5
YOR237W				0	2		0	0	2	1	4	0.5	0.25
YOR242C				0	2		0	0	2	1	4	0.5	0.25
YOR304C-A		uncharacterized, unknown function		0		2	0	0	2	1	4	0.5	0.25
YOR306C					1			0	1	1	2	0.5	0.5
YOR317W	FAA1				2	0	0	0	2	1	4	0.5	0.25
YOR384W	FRE5	Putative ferric reductase		0	1	1		0	2	2	4	0.5	0.5
YPL026C				0	2	0		0	2	1	4	0.5	0.25
YPL042C				1	0				1	1	2	0.5	0.5
YPL045W	VPS16	subunit of the HOPS complex		2	0	0		0	2	1	4	0.5	0.25
YPL086C	ELP3	Subunit of Elongator complex		0	0	0		2	2	1	4	0.5	0.25
YPL088W					1			0	1	1	2	0.5	0.5
YPL089C	RLM1	MAP kinase pathway		2	0	0		0	2	1	4	0.5	0.25
YPL115C					2	0	0	0	2	1	4	0.5	0.25
YPL130W				0	2		0	0	2	1	4	0.5	0.25
YPL133C	RDS2	regulator of drug sensitivity		2	0		0	0	2	1	4	0.5	0.25
YPL136W				0	2		0	0	2	1	4	0.5	0.25
YPL147W	PXA1	Subunit of a heterodimeric peroxisomal ATP-binding cassette transporter complex		0	2		0	0	2	1	4	0.5	0.25
YPL150W				0	2		0	0	2	1	4	0.5	0.25
YPL165C				1	1		0	0	2	2	4	0.5	0.5
YPL171C				1	1		0	0	2	2	4	0.5	0.5
YPL192C	PRM3				2	0	0	0	2	1	4	0.5	0.25
YPL193W	RSA1			0	2		0	0	2	1	4	0.5	0.25
YPL257W		uncharacterized, unknown function		1	0	1		0	2	2	4	0.5	0.5
YPR024W	YME1, YTA11	degradation of unfolded or misfolded mitochondrial gene products		2	0		0	0	2	1	4	0.5	0.25
YPR047W	MSF1			0	0		2	0	2	1	4	0.5	0.25
YPR063C		uncharacterized, unknown function		2	0	0		0	2	1	4	0.5	0.25
YPR096C		uncharacterized, unknown function		2	0	0		0	2	1	4	0.5	0.25
YPR098C		uncharacterized, unknown function		2	0	0		0	2	1	4	0.5	0.25
YPR100W				0	2	0		0	2	1	4	0.5	0.25
YPR117W		uncharacterized, unknown function		2	0	0		0	2	1	4	0.5	0.25
YPR118W				0	1				1	1	2	0.5	0.5
YPR121W	THI22			2	0	0		0	2	1	4	0.5	0.25
YPR125W	YLH47	Mitochondrial inner membrane protein		2	0	0		0	2	1	4	0.5	0.25
YPR127W					2	0	0	0	2	1	4	0.5	0.25
YPR135W	CTF4, CHL15, POB1			0	2	0		0	2	1	4	0.5	0.25
YPR145W	ASN1			0	2	0		0	2	1	4	0.5	0.25
YPR150W				0	2	0		0	2	1	4	0.5	0.25
YPR197C				0	2	0		0	2	1	4	0.5	0.25
YBR003W	COQ1			0	0	0	2	0	2	1	5	0.4	0.2
YBR020W	GAL1	Galactokinase		2	0	0	0	0	2	1	5	0.4	0.2
YBR075W		Putative metalloprotease		2	0	0	0	0	2	1	5	0.4	0.2
YBR113W		dubious		2	0	0	0	0	2	1	5	0.4	0.2
YBR169C	SSE2	Member of the heat shock protein 70 (HSP70) family		0	2	0	0	0	2	1	5	0.4	0.2
YCL009C	ILV6	Regulatory subunit of acetolactate synthase		0	0	2	0	0	2	1	5	0.4	0.2
YCL035C	GRX1			0	0	2	0	0	2	1	5	0.4	0.2
YCL061C	MRC1	S-phase checkpoint protein		1	0	1	0	0	2	2	5	0.4	0.4
YCL063W	VAC17	protein involved in vacuole inheritance; acts as a vacuole-specific receptor for myosin Myo2p		0	0	2	0	0	2	1	5	0.4	0.2
YCR092C	MSH3	Mismatch repair protein		2	0	0	0	0	2	1	5	0.4	0.2
YDL035C	GPR1	Plasma membrane G protein coupled receptor		0	0	2	0	0	2	1	5	0.4	0.2
YDL040C	NAT1, AAA1	Subunit of the N-terminal acetyltransferase NatA		0	2	0	0	0	2	1	5	0.4	0.2
YDL046W	NPC2	cholesterol-binding protein		0	2	0	0	0	2	1	5	0.4	0.2
YDL061C	RPS29B, YS29B	ribosomal protein		0	2	0	0	0	2	1	5	0.4	0.2
YDL066W	IDP1	Mitochondrial NADP-specific isocitrate dehydrogenase		0	2	0	0	0	2	1	5	0.4	0.2
YDL179W	PCL9	Cyclin, forms a kinase complex with Pho85p		2	0	0	0	0	2	1	5	0.4	0.2
YDL216C	RRI1	adaptation to pheromone signaling		2	0	0	0	0	2	1	5	0.4	0.2
YDL231C	BRE4	Zinc finger protein containing 5 TM domains; null mutant exhibits strongly fragmented vacuoles		2	0	0	0	0	2	1	5	0.4	0.2
YDL241W		uncharacterized, unknown function		2	0	0	0	0	2	1	5	0.4	0.2
YDL243C	AAD4	oxidative stress response		2	0	0	0	0	2	1	5	0.4	0.2
YDR015C		dubious		2	0	0	0	0	2	1	5	0.4	0.2
YDR019C	GCV1, GSD1	required for the catabolism of glycine		2	0	0	0	0	2	1	5	0.4	0.2
YDR022C	CIS1	autophagosome formation		2	0	0	0	0	2	1	5	0.4	0.2
YDR030C	RAD28	nucleotide repair of UV-induced DNA lesions		2	0	0	0	0	2	1	5	0.4	0.2
YDR033W	MRH1	induced during heat shock		2	0	0	0	0	2	1	5	0.4	0.2
YDR071C				1	0	0	0	1	2	2	5	0.4	0.4
YDR074W	TPS2, PFK3			0	0	2	0	0	2	1	5	0.4	0.2
YDR075W	PPH3	involved in activation of Gln3p		2	0	0	0	0	2	1	5	0.4	0.2
YDR078C	SHU2	uncharacterized, unknown function		2	0	0	0	0	2	1	5	0.4	0.2
YDR080W	VPS41, VAM2	subunit of the HOPS complex		0	0	0	2	0	2	1	5	0.4	0.2
YDR083W	RRP8	in rRNA processing		2	0	0	0	0	2	1	5	0.4	0.2
YDR159W	SAC3	Nuclear pore-associated protein		0	2	0	0	0	2	1	5	0.4	0.2
YDR223W				0	0	0	2	0	2	1	5	0.4	0.2
YDR234W				0	0	0	2	0	2	1	5	0.4	0.2
YDR290W				0	0	2	0	0	2	1	5	0.4	0.2
YDR320C	SWA2	involved in vesicular transport; clathrin-binding required for uncoating of clathrin-coated vesicles		2	0	0	0	0	2	1	5	0.4	0.2
YDR344C		dubious		0	0	0	2	0	2	1	5	0.4	0.2
YDR346C	SVF1	cell survival pathways		0	0	0	2	0	2	1	5	0.4	0.2
YDR395W	SXM1, KAP108	Nuclear transport factor		1	0	0	1	0	2	2	5	0.4	0.4
YDR417C				0	2	0	0	0	2	1	5	0.4	0.2
YDR465C	RMT2	Arginine methyltransferase		2	0	0	0	0	2	1	5	0.4	0.2
YDR483W	KRE2, MNT1	protein mannosylation		2	0	0	0	0	2	1	5	0.4	0.2
YDR496C	PUF6	Pumilio-homology domain protein		0	2	0	0	0	2	1	5	0.4	0.2
YDR514C		uncharacterized, unknown function		2	0	0	0	0	2	1	5	0.4	0.2
YDR517W	GRH1	spindle assembly checkpoint		2	0	0	0	0	2	1	5	0.4	0.2
YDR528W	HLR1			0	2	0	0	0	2	1	5	0.4	0.2
YEL008W				0	2	0	0	0	2	1	5	0.4	0.2
YEL020C		uncharacterized, unknown function		0	0	2	0	0	2	1	5	0.4	0.2
YEL028W				0	0	2	0	0	2	1	5	0.4	0.2
YEL033W		dubious		0	0	2	0	0	2	1	5	0.4	0.2
YEL056W	HAT2			0	0	2	0	0	2	1	5	0.4	0.2
YEL062W	NPR2	role in regulating expression of nitrogen permeases		0	1	1	0	0	2	2	5	0.4	0.4
YER044C-A	MEI4			0	0	2	0	0	2	1	5	0.4	0.2
YER046W-A				0	0	0	2	0	2	1	5	0.4	0.2
YER051W				0	0	2	0	0	2	1	5	0.4	0.2
YER066C-A		dubious		0	0	2	0	0	2	1	5	0.4	0.2
YER069W	ARG5, 6			0	0	2	0	0	2	1	5	0.4	0.2
YER110C	KAP123, YRB4	mediates nuclear import of ribosomal proteins		1	0	1	0	0	2	2	5	0.4	0.4
YER114C	BOI2, BEB1	polar growth, interacts with Bem1p		2	0	0	0	0	2	1	5	0.4	0.2
YER124C				0	2	0	0	0	2	1	5	0.4	0.2
YER129W	PAK1			0	2	0	0	0	2	1	5	0.4	0.2
YER130C				0	2	0	0	0	2	1	5	0.4	0.2
YER131W	RPS26B	ribosomal protein		0	2	0	0	0	2	1	5	0.4	0.2
YER140W				0	2	0	0	0	2	1	5	0.4	0.2
YER142C	MAG1, MMS5			0	2	0	0	0	2	1	5	0.4	0.2
YER143W	DDI1, VSM1	DNA damage-inducible v-SNARE binding protein		2	0	0	0	0	2	1	5	0.4	0.2
YFL004W	VTC2, PHM1			0	0	2	0	0	2	1	5	0.4	0.2
YFL034C-A	RPL22B	ribosomal protein		2	0	0	0	0	2	1	5	0.4	0.2
YFR045W		uncharacterized, unknown function		2	0	0	0	0	2	1	5	0.4	0.2
YGL002W	ERP6	involved in ER to Golgi transport		0	0	2	0	0	2	1	5	0.4	0.2
YGL029W	CGR1	nucleolar integrity and processing of the pre-rRNA for the 60S ribosome subunit		2	0	0	0	0	2	1	5	0.4	0.2
YGL032C	AGA2	Adhesion subunit of a-agglutinin of a-cells		2	0	0	0	0	2	1	5	0.4	0.2
YGL039W		Oxidoreductase		2	0	0	0	0	2	1	5	0.4	0.2
YGL049C	TIF4632	Translation initiation factor eIF4G		2	0	0	0	0	2	1	5	0.4	0.2
YGL053W	PRM8	involved in COPII binding		2	0	0	0	0	2	1	5	0.4	0.2
YGL054C	ERV14	Prot localized to COPII-coated vesicles, involved in vesicle formation and incorporation of cargo		2	0	0	0	0	2	1	5	0.4	0.2
YGL056C	SDS23	APC/cyclosome regulation		2	0	0	0	0	2	1	5	0.4	0.2
YGL062W	PYC1	Pyruvate carboxylase isoform		0	2	0	0	0	2	1	5	0.4	0.2
YGL063W	PUS2	Putative pseudouridine synthase		2	0	0	0	0	2	1	5	0.4	0.2
YGL084C	GUP1	MP prot with a possible role in proton symport of glycerol		0	0	2	0	0	2	1	5	0.4	0.2
YGL094C	PAN2			0	2	0	0	0	2	1	5	0.4	0.2
YGL140C		uncharacterized, unknown function		2	0	0	0	0	2	1	5	0.4	0.2
YGL166W				0	2	0	0	0	2	1	5	0.4	0.2
YGL198W	YIP4	interacts with Rab GTPases, localized to late Golgi vesicles		2	0	0	0	0	2	1	5	0.4	0.2
YGR022C				0	0	2	0	0	2	1	5	0.4	0.2
YGR039W				0	0	0	2	0	2	1	5	0.4	0.2
YGR041W	BUD9			0	0	0	2	0	2	1	5	0.4	0.2
YGR042W				0	0	0	2	0	2	1	5	0.4	0.2
YGR044C	RME1, CSP1	control of meiosis		2	0	0	0	0	2	1	5	0.4	0.2
YGR118W	RPS23A	ribosomal protein		0	0	0	2	0	2	1	5	0.4	0.2
YGR129W	SYF2	Component of the spliceosome complex		2	0	0	0	0	2	1	5	0.4	0.2
YGR132C	PHB1			0	0	0	2	0	2	1	5	0.4	0.2
YGR254W	ENO1, HSP48			0	0	0	2	0	2	1	5	0.4	0.2
YGR260W				2	0	0	0	0	2	1	5	0.4	0.2
YHL005C				0	2	0	0	0	2	1	5	0.4	0.2
YHL036W	MUP3	methionine uptake		0	0	2	0	0	2	1	5	0.4	0.2
YHR013C	ARD1			0	0	2	0	0	2	1	5	0.4	0.2
YHR031C	RRM3, RTT104	DNA helic		0	2	0	0	0	2	1	5	0.4	0.2
YHR155W	YSP1	Mitochondrial protein with a potential role in promoting mitochondrial fragmentation during programmed cell death		2	0	0	0	0	2	1	5	0.4	0.2
YHR156C	LIN1	Non-essential component of U5 snRNP		2	0	0	0	0	2	1	5	0.4	0.2
YHR189W				0	0	2	0	0	2	1	5	0.4	0.2
YIL087C				0	2	0	0	0	2	1	5	0.4	0.2
YIL093C	RSM25			0	2	0	0	0	2	1	5	0.4	0.2
YIL094C	LYS12	Homo-isocitrate dehydrogenase		0	2	0	0	0	2	1	5	0.4	0.2
YIL098C				0	2	0	0	0	2	1	5	0.4	0.2
YIL105C	SLM1			0	2	0	0	0	2	1	5	0.4	0.2
YIL133C	RPL16A	ribosomal protein		2	0	0	0	0	2	1	5	0.4	0.2
YIL134W	FLX1	transport of flavin adenine dinucleotide (FAD)		2	0	0	0	0	2	1	5	0.4	0.2
YIL139C	REV7	DNA repair and translesion synthesis		2	0	0	0	0	2	1	5	0.4	0.2
YIL153W	RRD1	Activator of the phosphotyrosyl phosphatase PP2A		0	0	2	0	0	2	1	5	0.4	0.2
YIL156W	UBP7	ubiquitin-specific protease		2	0	0	0	0	2	1	5	0.4	0.2
YIR020C		dubious		0	0	2	0	0	2	1	5	0.4	0.2
YIR032C	DAL3			0	2	0	0	0	2	1	5	0.4	0.2
YJL022W				0	0	2	0	0	2	1	5	0.4	0.2
YJL070C				0	0	2	0	0	2	1	5	0.4	0.2
YJL077C	ICS3			0	2	0	0	0	2	1	5	0.4	0.2
YJL103C	GSM1	uncharacterized, unknown function		1	0	1	0	0	2	2	5	0.4	0.4
YJL191W	RPS14B, CRY2	ribosomal protein		2	0	0	0	0	2	1	5	0.4	0.2
YJL201W	ECM25	unknown function		0	2	0	0	0	2	1	5	0.4	0.2
YJR010C-A	SPC1	Subunit of the signal peptidase complex (SPC)		0	0	2	0	0	2	1	5	0.4	0.2
YJR036C	HUL4			0	0	2	0	0	2	1	5	0.4	0.2
YKL076C	PSY1	dubious		2	0	0	0	0	2	1	5	0.4	0.2
YKL121W				0	0	0	2	0	2	1	5	0.4	0.2
YKL148C	SDH1			0	0	2	0	0	2	1	5	0.4	0.2
YKL179C	COY1	Golgi membrane protein		2	0	0	0	0	2	1	5	0.4	0.2
YKL220C	FRE2	Ferric reductase and cupric reductase		2	0	0	0	0	2	1	5	0.4	0.2
YKR003W	OSH6			0	2	0	0	0	2	1	5	0.4	0.2
YKR013W	PRY2	unknown function		0	2	0	0	0	2	1	5	0.4	0.2
YKR049C	FMP46	Putative redox protein		2	0	0	0	0	2	1	5	0.4	0.2
YKR058W	GLG1			0	2	0	0	0	2	1	5	0.4	0.2
YKR074W				2	0	0	0	0	2	1	5	0.4	0.2
YKR089C	TGL4			2	0	0	0	0	2	1	5	0.4	0.2
YKR101W				2	0	0	0	0	2	1	5	0.4	0.2
YKR103W				0	2	0	0	0	2	1	5	0.4	0.2
YLL021W	SPA2	Component of the polarisome, which functions in actin cytoskeletal organization during polarized growth		0	0	2	0	0	2	1	5	0.4	0.2
YLL061W	MMP1	High-affinity S-methylmethionine permease		0	0	1	1	0	2	2	5	0.4	0.4
YLR352W				0	0	2	0	0	2	1	5	0.4	0.2
YLR354C	TAL1			0	2	0	0	0	2	1	5	0.4	0.2
YLR371W	ROM2			0	2	0	0	0	2	1	5	0.4	0.2
YLR377C	FBP1			0	2	0	0	0	2	1	5	0.4	0.2
YLR427W	MAG2	hydrolysis of alkylated DNA		2	0	0	0	0	2	1	5	0.4	0.2
YLR428C		dubious		2	0	0	0	0	2	1	5	0.4	0.2
YLR444C		dubious		2	0	0	0	0	2	1	5	0.4	0.2
YLR445W		uncharacterized, unknown function		2	0	0	0	0	2	1	5	0.4	0.2
YLR454W		uncharacterized, unknown function		2	0	0	0	0	2	1	5	0.4	0.2
YLR456W		uncharacterized, unknown function		2	0	0	0	0	2	1	5	0.4	0.2
YML058W	SML1			0	2	0	0	0	2	1	5	0.4	0.2
YMR053C	STB2			0	2	0	0	0	2	1	5	0.4	0.2
YMR110C				0	2	0	0	0	2	1	5	0.4	0.2
YMR151W	YIM2	dubious		0	0	0	2	0	2	1	5	0.4	0.2
YMR167W	MLH1, PMS2	mismatch repair in mitosis and meiosis		0	0	1	1	0	2	2	5	0.4	0.4
YMR194C-A				0	2	0	0	0	2	1	5	0.4	0.2
YMR196W				0	2	0	0	0	2	1	5	0.4	0.2
YMR198W	CIK1			0	2	0	0	0	2	1	5	0.4	0.2
YMR202W	ERG2	sterol isomerase		0	2	0	0	0	2	1	5	0.4	0.2
YMR312W				0	2	0	0	0	2	1	5	0.4	0.2
YMR317W				0	2	0	0	0	2	1	5	0.4	0.2
YNL012W	SPO1	meiotic spindle pole body duplic. and separa.		2	0	0	0	0	2	1	5	0.4	0.2
YNL034W				0	2	0	0	0	2	1	5	0.4	0.2
YNL086W		uncharacterized, unknown function		2	0	0	0	0	2	1	5	0.4	0.2
YNL111C	CYB5	Cytochrome b5		2	0	0	0	0	2	1	5	0.4	0.2
YNL154C	YCK2	plasma membrane-bound casein kinase I isoform		0	0	1	1	0	2	2	5	0.4	0.4
YNL156C				0	0	2	0	0	2	1	5	0.4	0.2
YNL159C	ASI2	integral inner nuclear membrane protein		0	0	1	0	1	2	2	5	0.4	0.4
YNL160W	YGP1	cell wall-related secretory glycoprotein		0	0	2	0	0	2	1	5	0.4	0.2
YNL165W				0	0	2	0	0	2	1	5	0.4	0.2
YNL175C	NOP13			2	0	0	0	0	2	1	5	0.4	0.2
YNL195C				0	2	0	0	0	2	1	5	0.4	0.2
YNL311C				0	2	0	0	0	2	1	5	0.4	0.2
YNL323W	LEM3, BRE3	translocation of phospholipids across the MP		0	0	0	0	2	2	1	5	0.4	0.2
YNR001C	CIT1, CS1	citric cycle		2	0	0	0	0	2	1	5	0.4	0.2
YNR042W				0	2	0	0	0	2	1	5	0.4	0.2
YNR069C	BSC5	unknown function		2	0	0	0	0	2	1	5	0.4	0.2
YOL004W				0	2	0	0	0	2	1	5	0.4	0.2
YOL047C				2	0	0	0	0	2	1	5	0.4	0.2
YOL111C	MDY2	Protein required for efficient mating		2	0	0	0	0	2	1	5	0.4	0.2
YOL125W	TRM13	uncharacterized, unknown function		2	0	0	0	0	2	1	5	0.4	0.2
YOL138C				0	2	0	0	0	2	1	5	0.4	0.2
YOR018W	ROD1	Membrane protein, which are required for a ubiquitin ligase		0	0	1	1	0	2	2	5	0.4	0.4
YOR034C				2	0	0	0	0	2	1	5	0.4	0.2
YOR039W				0	0	0	2	0	2	1	5	0.4	0.2
YOR043W	WHI2	general stress response		2	0	0	0	0	2	1	5	0.4	0.2
YOR044W	IRC23	uncharacterized, unknown function		0	0	0	0	2	2	1	5	0.4	0.2
YOR054c				0	0	2	0	0	2	1	5	0.4	0.2
YOR069W	VPS5	localizing membrane proteins from a prevacuolar/late endosomal compartment back to the late Golgi apparatus		0	0	2	0	0	2	1	5	0.4	0.2
YOR070C	GYP1	Cis-golgi GTPase-activating protein (GAP) for the Rab family members Ypt1p (in vivo) and for Ypt1p, Sec4p, Ypt7p, and Ypt51p (in vitro); involved in vesicle docking and fusion		0	0	2	0	0	2	1	5	0.4	0.2
YOR086C	TCB1	Lipid-binding protein containing three calcium and lipid binding domains		0	1	1	0	0	2	2	5	0.4	0.4
YOR090C				0	0	2	0	0	2	1	5	0.4	0.2
YOR100C				2	0	0	0	0	2	1	5	0.4	0.2
YOR120W	GCY1	glycerol catabolism		2	0	0	0	0	2	1	5	0.4	0.2
YOR124C	UBP2	removes ubiquitin from ubiquitinated prot		2	0	0	0	0	2	1	5	0.4	0.2
YOR134W				0	0	2	0	0	2	1	5	0.4	0.2
YOR173W	DCS2	Non-essential, stress induced regulatory protein		0	0	0	2	0	2	1	5	0.4	0.2
YOR177C	MPC54	Component of the meiotic outer plaque; potential Cdc28p substrate		2	0	0	0	0	2	1	5	0.4	0.2
YOR198C	BFR1	Component of mRNP complexes associated with polyribosomes		0	0	0	1	1	2	2	5	0.4	0.4
YOR233W	KIN4	Kinase, inhibits the mitotic exit network		0	1	1	0	0	2	2	5	0.4	0.4
YOR277C				0	0	2	0	0	2	1	5	0.4	0.2
YOR306C	MCH5	MP riboflavin transporter		0	0	2	0	0	2	1	5	0.4	0.2
YOR307C	SLY41	ER-to-Golgi transport		0	0	0	2	0	2	1	5	0.4	0.2
YOR309C				0	2	0	0	0	2	1	5	0.4	0.2
YOR316C	COT1	zinc transporter into the vacuole		0	0	2	0	0	2	1	5	0.4	0.2
YOR318C		dubious		0	1	1	0	0	2	2	5	0.4	0.4
YOR325W				0	2	0	0	0	2	1	5	0.4	0.2
YOR327C				0	2	0	0	0	2	1	5	0.4	0.2
YOR360C				0	2	0	0	0	2	1	5	0.4	0.2
YOR365C		uncharacterized, unknown function		0	2	0	0	0	2	1	5	0.4	0.2
YOR375C	GDH1	NADP(+)-dependent glutamate dehydrogenase		2	0	0	0	0	2	1	5	0.4	0.2
YOR376W				0	0	0	2	0	2	1	5	0.4	0.2
YPL101W				0	2	0	0	0	2	1	5	0.4	0.2
YPL102C				0	2	0	0	0	2	1	5	0.4	0.2
YPL107W		uncharacterized, unknown function		0	1	1	0	0	2	2	5	0.4	0.4
YPL111W				0	2	0	0	0	2	1	5	0.4	0.2
YPL120W				0	0	2	0	0	2	1	5	0.4	0.2
YPL148C	PPT2			0	2	0	0	0	2	1	5	0.4	0.2
YPL156C				1	0	0	0	1	2	2	5	0.4	0.4
YPL166W	ATG29	autophagy		0	0	0	0	2	2	1	5	0.4	0.2
YPL167C				0	2	0	0	0	2	1	5	0.4	0.2
YPL244C	HUT1			0	2	0	0	0	2	1	5	0.4	0.2
YPL249C	GYP5	GTPase-activating protein (GAP) for yeast Rab family members, involved in ER to Golgi trafficking		0	0	1	1	0	2	2	5	0.4	0.4
YPR018W	RLF2, CAC1	subunit of Chromatin Assembly Complex		2	0	0	0	0	2	1	5	0.4	0.2
YPR123C		dubious		2	0	0	0	0	2	1	5	0.4	0.2
YPR129W	SCD6			0	0	2	0	0	2	1	5	0.4	0.2
YAL028W				0	1			0	1	1	3	0.333333	0.333333
YAL031C	FUN21	cytoplasmic Glc7-interacting protein prevents chromosomes segregation		1	0			0	1	1	3	0.333333	0.333333
YAL034C	FUN19	unknown function		1	0			0	1	1	3	0.333333	0.333333
YAL037W				0	1			0	1	1	3	0.333333	0.333333
YAL042W	ERV46, FUN9			0	1			0	1	1	3	0.333333	0.333333
YAL051W	OAF1, YAF1			0	1			0	1	1	3	0.333333	0.333333
YAL053W				1	0			0	1	1	3	0.333333	0.333333
YAL054C	ACS1, FUN44			0	1			0	1	1	3	0.333333	0.333333
YAL055W	PEX22, YAF5	uncharacterized, unknown function		0	1			0	1	1	3	0.333333	0.333333
YAL066W				0	1			0	1	1	3	0.333333	0.333333
YAR020C	PAU7	active during alcoholic fermentation		1	0			0	1	1	3	0.333333	0.333333
YAR029W				1	0			0	1	1	3	0.333333	0.333333
YBL009W				1	0			0	1	1	3	0.333333	0.333333
YBL016W	FUS3, DAC2			1	0			0	1	1	3	0.333333	0.333333
YBL036C				1			0	0	1	1	3	0.333333	0.333333
YBL078C	AUT7, APG8			1	0			0	1	1	3	0.333333	0.333333
YBL079W	NUP170, NLE3			1	0			0	1	1	3	0.333333	0.333333
YBL103C	RTG3			1	0			0	1	1	3	0.333333	0.333333
YBR026C	MRF1'			1	0			0	1	1	3	0.333333	0.333333
YBR041W	FAT1			1	0			0	1	1	3	0.333333	0.333333
YBR046C	ZTA1			1	0			0	1	1	3	0.333333	0.333333
YBR047W				1	0			0	1	1	3	0.333333	0.333333
YBR053C				1	0	0			1	1	3	0.333333	0.333333
YBR075W				1	0			0	1	1	3	0.333333	0.333333
YBR100W				1	0			0	1	1	3	0.333333	0.333333
YBR103W	SIF2, EMB1			1	0			0	1	1	3	0.333333	0.333333
YBR107C	IML3, MCM19			1	0			0	1	1	3	0.333333	0.333333
YBR131W	CCZ1			1	0			0	1	1	3	0.333333	0.333333
YBR138C	HDR1			1	0			0	1	1	3	0.333333	0.333333
YBR144C				1	0			0	1	1	3	0.333333	0.333333
YBR157C	ICS2			1	0			0	1	1	3	0.333333	0.333333
YBR158W	CST13, ICS4			1	0			0	1	1	3	0.333333	0.333333
YBR159W				1	0			0	1	1	3	0.333333	0.333333
YBR183W				1	0			0	1	1	3	0.333333	0.333333
YBR185C				1	0			0	1	1	3	0.333333	0.333333
YBR186W				1	0			0	1	1	3	0.333333	0.333333
YBR220C				1	0			0	1	1	3	0.333333	0.333333
YBR225W				1	0			0	1	1	3	0.333333	0.333333
YBR240C				1	0			0	1	1	3	0.333333	0.333333
YBR261C				1	0			0	1	1	3	0.333333	0.333333
YBR279W				1			0	0	1	1	3	0.333333	0.333333
YBR292C				1	0			0	1	1	3	0.333333	0.333333
YBR294W	SUL1			0	1			0	1	1	3	0.333333	0.333333
[truncated: 655 more rows]
